# Supplementary material for: Effects of metal–metal bonding in photosensitizers: red-shifted absorption and oscillator strength enhancement
Source: Royal Society of Chemistry journal article supplement (doi:10.1039/d4qi02131b), 2024-01-01
Supplement: d4qi02131b1.pdf [file d4qi02131b1.pdf]

## Supporting Information

### Effects of Metal–Metal Bonding in Photosensitizers: Red-Shifted Absorption and Oscillator Strength Enhancement

Oshan J. Jinarathne and Malkanthi K. Karunananda\*

Department of Chemistry, Saint Louis University, St. Louis, Missouri 63103, United States.

\*E-mail: [malkanthi.karunananda@slu.edu](mailto:malkanthi.karunananda@slu.edu)

### Table of Contents

|                                                                                                                                                       |    |
|-------------------------------------------------------------------------------------------------------------------------------------------------------|----|
| 1. Benchmarking Data for DFT calculations.....                                                                                                        | 2  |
| 2. Calculated Absorption Spectra marked with Oscillator Strengths (Vertical Lines) .....                                                              | 5  |
| 3. Comparison of [Ru-1] geometries.....                                                                                                               | 6  |
| 4. Visualized NTOs.....                                                                                                                               | 8  |
| 5. Orbital Contributions for each NTO.....                                                                                                            | 12 |
| 6. Data Tables for the MVR analysis.....                                                                                                              | 14 |
| 7. MVR Plots.....                                                                                                                                     | 16 |
| 7.1 MVR analysis with Metal percentage in the <i>hole</i> ( $M_H$ ) and Molecular Orbital Bond Order .....                                            | 16 |
| 7.2 MVR analysis with Metal percentage in the <i>hole</i> ( $M_H$ ), Molecular Orbital Bond Order and HOMO-LUMO Energy gap .....                      | 17 |
| 7.3 MVR analysis with Metal percentage in the <i>hole</i> ( $M_H$ ), Molecular Orbital Bond Order, HOMO-LUMO Energy gap and Dielectric constant ..... | 18 |
| 7.4 Excluding one metal parameter at a time .....                                                                                                     | 19 |
| 8. Replacing $M_H$ with difference between $M_H$ and $M_P$ .....                                                                                      | 21 |
| 9. Calculated NBOs .....                                                                                                                              | 22 |
| 10. Optimized Coordinates (Charge and Multiplicity added to the first line) .....                                                                     | 31 |
| 11. References.....                                                                                                                                   | 74 |

## 1. Benchmarking Data for DFT calculations

TD-DFT methods which have shown remarkable accuracy in predictions of absorption wavelengths and excited states in organic molecules were used here.<sup>1-3</sup> However, since most of the DFT functionals overestimate the excitation energies due to the underestimation of electronic correlation effects for transition metal complexes and also makes errors in the predictions of charge transfers,<sup>4,5</sup> we performed benchmarking studies to identify the functional with the highest accuracy. A series of hybrid functionals (cam-B3LYP, B3PW91, BPV86, M06 and PBEPBE) were used with the Polarizable Continuum Model (PCM). The number of excited states was varied to match the best fit for the experimental wavelengths (Table S1, Column 2). While some functionals showed closer values for some of the absorption wavelengths (Table S1), the range separated hybrid functional cam-B3LYP which is known for minimizing the above mentioned errors was the most accurate in predicting all the peaks with reasonable accuracy.<sup>4-6</sup> The functional cam-B3LYP was also the most accurate in predicting the experimental molar absorptivity in all the complexes (Table S2). UV-Vis plots were obtained from TD DFT output files using GaussView 6.<sup>16</sup>

Table S1: TD-DFT benchmarking Data for Absorption wavelength/nm

| Complex                | Number of Excited States | Wavelength/nm             |                        |                      |                    |                      |                    |
|------------------------|--------------------------|---------------------------|------------------------|----------------------|--------------------|----------------------|--------------------|
|                        |                          | Experimental nm           | cam-B3LYP              | B3PW91               | BPV86              | M06                  | PBEPBE             |
| [Ag-1] <sup>7</sup>    | 70                       | -                         | 190                    | 259                  | 261                | 200                  | 289                |
| [Ag-2] <sup>8</sup>    | 70                       | 257*<br>351<br>364<br>467 | 228<br>304<br>-<br>438 | 252<br>320<br>-<br>- | -<br>365<br>-<br>- | 255<br>333<br>-<br>- | -<br>366<br>-<br>- |
| [Ag-2-A] <sup>8</sup>  | 70                       | 254*<br>348<br>460        | 230<br>326<br>435      | 298<br>378<br>579    | -<br>-<br>428      | 272<br>354<br>405    | -<br>-<br>515      |
| [Ru-1]                 | 70                       | -                         | 481                    | 449                  | 383                | 575                  | 279                |
| [Ru-2] <sup>9</sup>    | 70                       | 672*<br>880               | 591<br>868             | 629<br>821           | 668<br>812         | 607<br>-             | 665<br>-           |
| [Mo-1]                 | 30                       | -                         | 289                    | 343                  | 776                | 392                  | 781                |
| [Mo-2] <sup>10</sup>   | 30                       | 521*                      | 436                    | 583                  | 675                | 494                  | 680                |
| [Rh-2-A] <sup>11</sup> | 70                       | 330*<br>433<br>575        | 306<br>400<br>586      | 325<br>349<br>-      | 380<br>-<br>849    | 329<br>358<br>-      | 381<br>458<br>520  |

|                              |    |                           |                          |                        |                      |                        |                      |
|------------------------------|----|---------------------------|--------------------------|------------------------|----------------------|------------------------|----------------------|
| <b>[Rh-2-B]<sup>12</sup></b> | 70 | 258*<br>367<br>560<br>832 | 254<br>306<br>551<br>-   | -<br>337<br>342        | -<br>-<br>481<br>886 | -<br>341<br>-<br>-     | -<br>-<br>470<br>-   |
| <b>[Rh-2-C]<sup>13</sup></b> | 70 | 259*<br>366<br>554        | 272<br>331<br>515        | -<br>339<br>523        | -<br>-<br>526        | -<br>340<br>-          | -<br>-<br>527        |
| <b>[Rh-2-D]<sup>14</sup></b> | 70 | 275*<br>371<br>531        | 256<br>312<br>-          | -<br>330<br>496        | -<br>-<br>492        | -<br>318<br>472        | -<br>-<br>492        |
| <b>[Rh-2-E]<sup>14</sup></b> | 70 | 260*<br>315<br>419<br>525 | 285<br>341<br>430<br>-   | -<br>339<br>449<br>522 | -<br>-<br>464<br>538 | -<br>331<br>342<br>475 | -<br>-<br>464<br>-   |
| <b>[Rh-2-F]<sup>14</sup></b> | 70 | 261*<br>314<br>418<br>553 | 285<br>340<br>482        | -<br>355<br>455<br>588 | -<br>-<br>483<br>569 | -<br>342<br>417<br>503 | -<br>-<br>-<br>645   |
| <b>[Rh-2-G]<sup>13</sup></b> | 70 | 251*<br>347<br>442<br>692 | 250<br>295<br>374<br>514 | -<br>317<br>335<br>543 | -<br>-<br>431<br>689 | -<br>310<br>414<br>529 | -<br>-<br>433<br>693 |
| <b>[Rh-2-H]<sup>13</sup></b> | 70 | 235*<br>300<br>436<br>566 | 237<br>303<br>422<br>503 | -<br>368<br>-<br>556   | -<br>-<br>-<br>527   | -<br>-<br>351<br>490   | -<br>-<br>-<br>523   |
| <b>[Mo-2-A]<sup>15</sup></b> | 30 | 490*                      | 396                      | 493                    | 572                  | 485                    | 575                  |
| <b>[Mo-2-B]<sup>15</sup></b> | 30 | 470*                      | 409                      | 555                    | 613                  | 545                    | 413                  |

\*  $\lambda_{\max}$

Table S2: TD DFT Benchmarking Data for  $\epsilon$ 

| Complex                  | Experimental  |                            | Calculated $\epsilon / M^{-1}cm^{-1}$ |        |       |       |        |
|--------------------------|---------------|----------------------------|---------------------------------------|--------|-------|-------|--------|
|                          | Wavelength/nm | $\epsilon / M^{-1}cm^{-1}$ | cam-B3LYP                             | B3PW91 | BPV86 | M06   | PBEPBE |
| [Ag-2] in DCM            | 257           | 23000                      | 22000                                 | 22000  | -     | 22000 | -      |
| [Ag-2-A] in DCM          | 254           | 47000                      | 45000                                 | 40000  | -     | 30000 | -      |
| [Ru-2] in EtOAc          | 672           | 6729                       | 6800                                  | 5600   | 6000  | 5600  | 5500   |
| [Mo-2] in THF            | 521           | 46000                      | 46000                                 | 40000  | 30000 | 45000 | 52000  |
| [Rh-2-A] in DMF          | 330           | 18000                      | 17000                                 | 19000  | 18000 | 19000 | 14000  |
| [Rh-2-B] in Acetonitrile | 258           | 124000                     | 118000                                | -      | -     | -     | -      |
| [Rh-2-C] in Acetonitrile | 259           | 83000                      | 85000                                 | -      | -     | -     | -      |
| [Rh2-D] in Acetonitrile  | 275           | 107000                     | 110000                                | -      | -     | -     | -      |
| [Rh2-E] in Acetonitrile  | 260           | 92000                      | 100000                                | -      | -     | -     | -      |
| [Rh2-F] in Acetonitrile  | 261           | 100000                     | 100000                                | -      | -     | -     | -      |
| [Rh2-G] in Acetonitrile  | 251           | 67000                      | 65000                                 | -      | -     | -     | -      |
| [Rh2-H] in Acetonitrile  | 235           | 55000                      | 56000                                 | -      | -     | -     | -      |
| [Mo2-A] in THF           | 490           | 18600                      | 20000                                 | 35000  | 12000 | 25000 | 12000  |
| [Mo2-B] in THF           | 470           | 5600                       | 5500                                  | 2000   | 5000  | 5000  | 6000   |

## 2. Calculated Absorption Spectra marked with Oscillator Strengths (Vertical Lines)

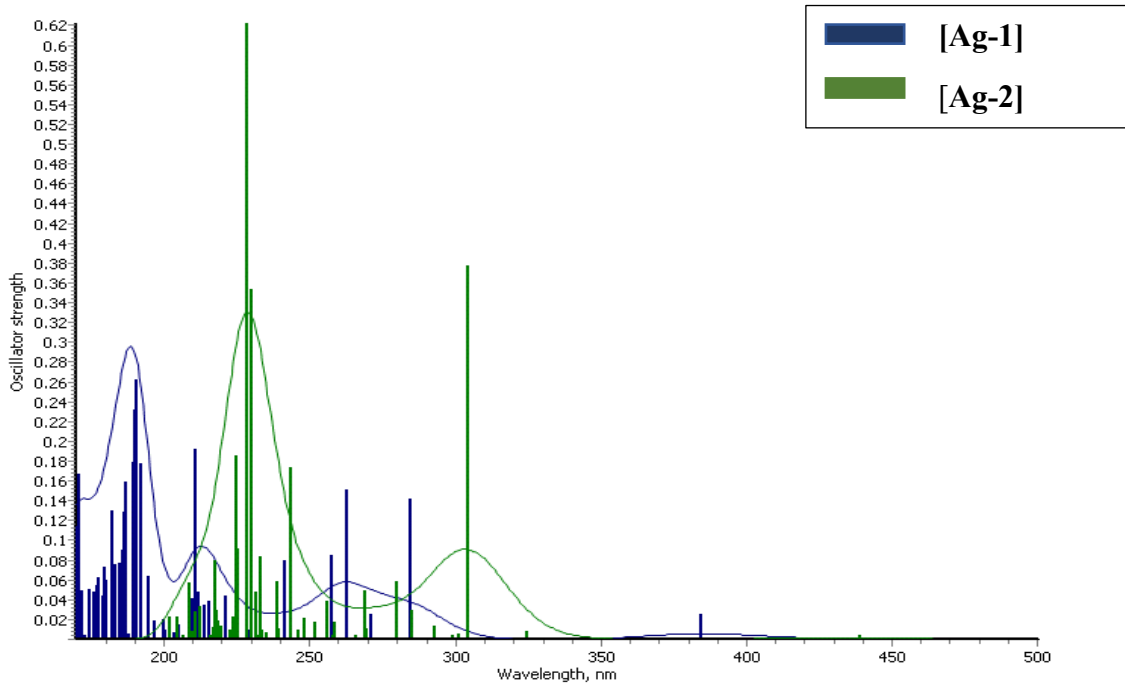

Figure S 1: Calculated Oscillator Strengths for [Ag-1] and [Ag-2]

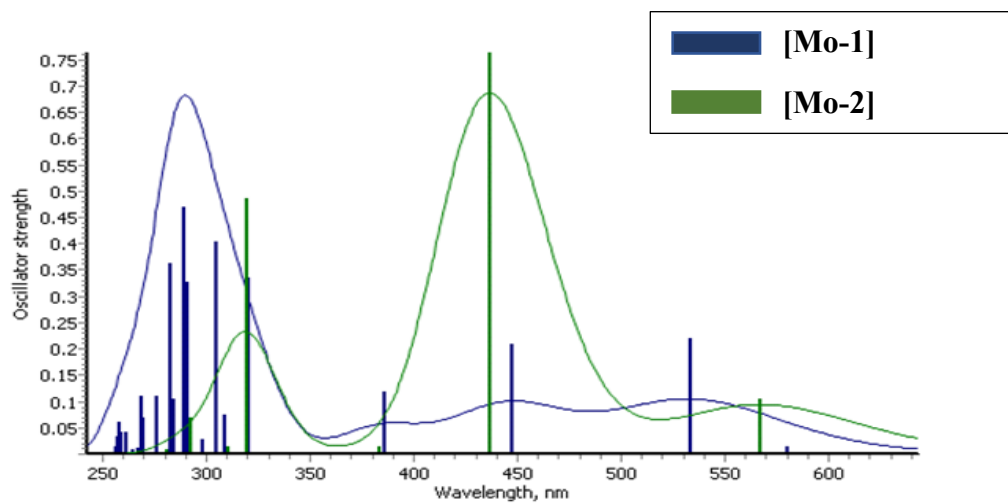

Figure S 2 : Calculated oscillator strengths of [Mo-1] and [Mo-2]

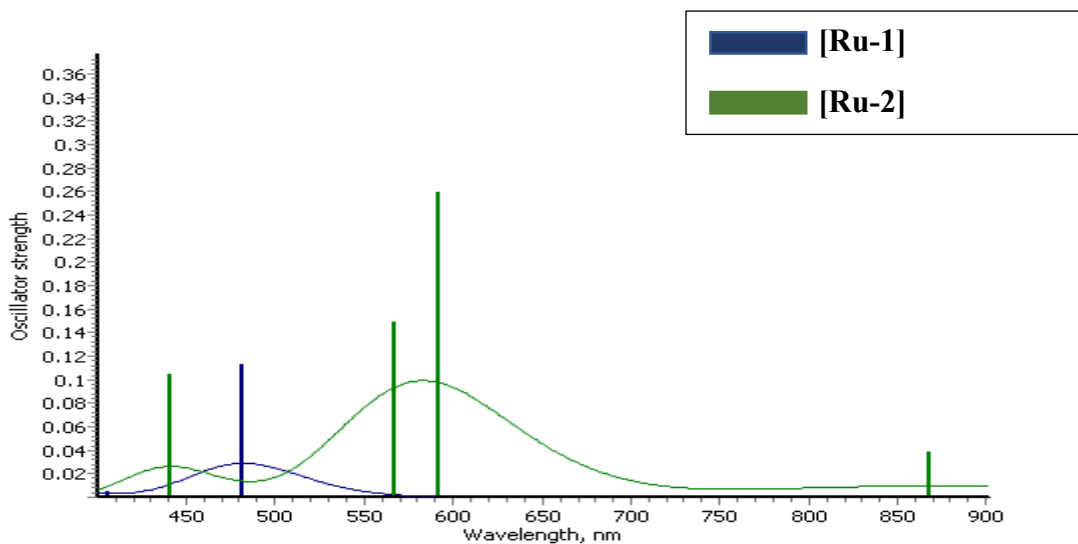

Figure S 4 : Calculated Oscillator Strengths for [Ru-1] and [Ru-2]

### 3. Comparison of [Ru-1] geometries

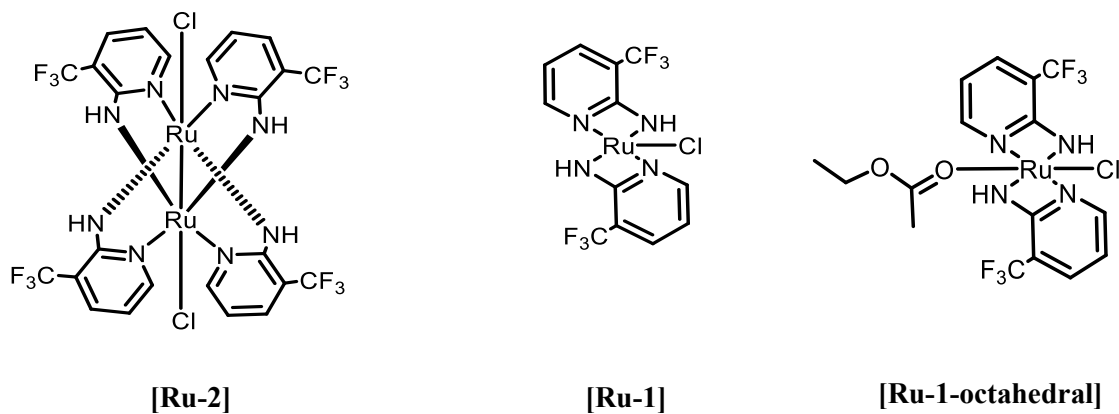

Figure S 5: [Ru-2], [Ru-1] and [Ru-1-octahedral] complexes

Since **[Ru-2]** exhibits a six-coordinate octahedral geometry which is favorable for photoreactivity, and **[Ru-1]** exhibits a square pyramidal geometry which is relatively unfavorable, we modeled a six-coordinate octahedral ruthenium analogue of the monomer, **[Ru-1-Octahedral]** to probe any geometrical effects that might skew our analysis. The empty coordination site of **[Ru-1]** was filled with a solvent molecule (ethyl acetate). The  $\lambda_{\max}$  (482nm in **[Ru-1]** vs. 496nm in **[Ru-1-Octahedral]**) and the oscillator strength (0.113 in **[Ru-1]** vs. 0.120 in **[Ru-1-Octahedral]**) values were comparable, and the trends remained the same.

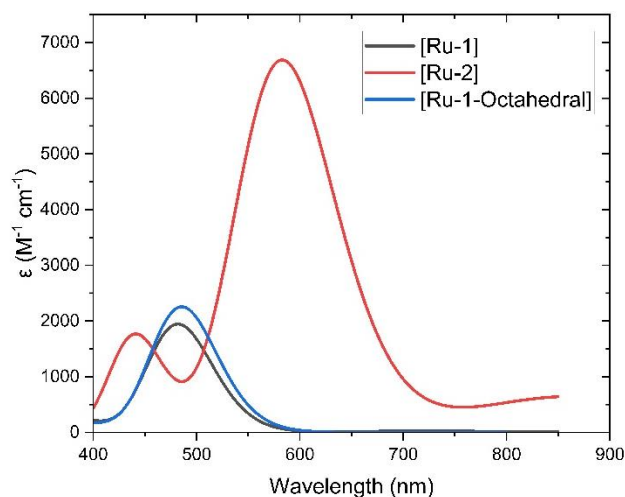

Figure S 6: Simulated UV-Vis spectra of **[Ru-1]**, **[Ru-1-Octahedral]** and **[Ru-2]**

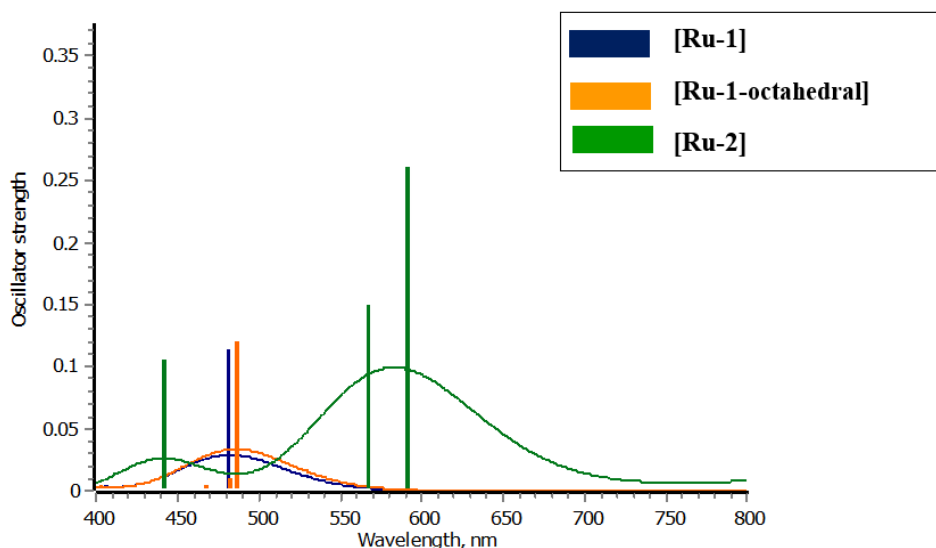

Figure S 7: Calculated Oscillator Strengths for **[Ru-1]**, **[Ru-1-Octahedral]** and **[Ru-2]**.

#### 4. Visualized NTOs

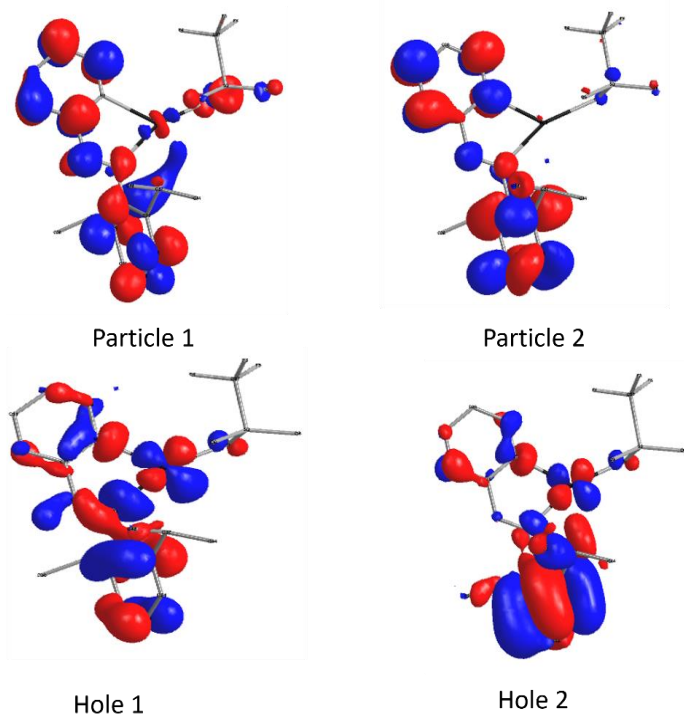

Figure S 8 : Particle 1 and 2 (Top) and Hole 2 (Bottom) for the maximum absorption transition for [Ag-1]



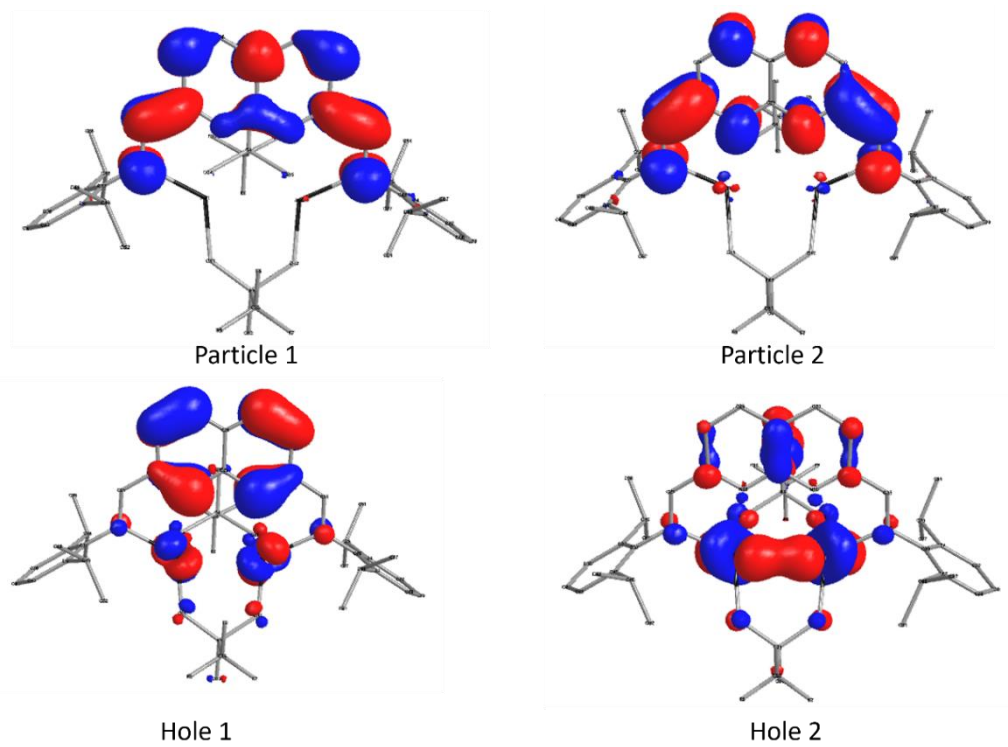

Figure S 9 : Particle 1 and 2 (Top) and Hole 2 (Bottom) for the maximum absorption transition for [Ag-2]

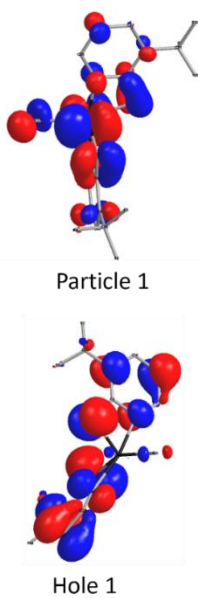

Figure S 10: Particle 1 (Top) and Hole (Bottom) for the maximum absorption transition for [Ru-1]

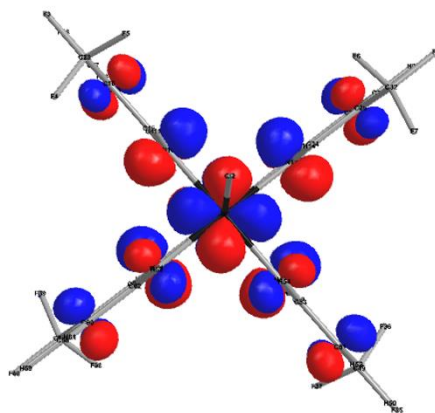

Particle 1

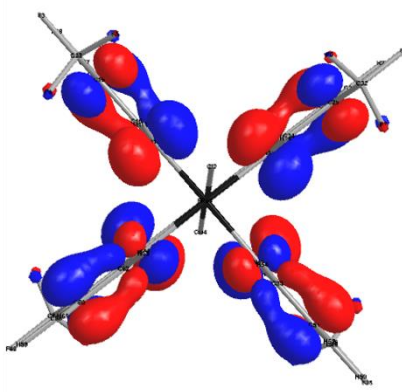

Hole 1

Figure S 11 : Particle 1 (Top) and Hole (Bottom) for the maximum absorption transition for **[Ru-2]**

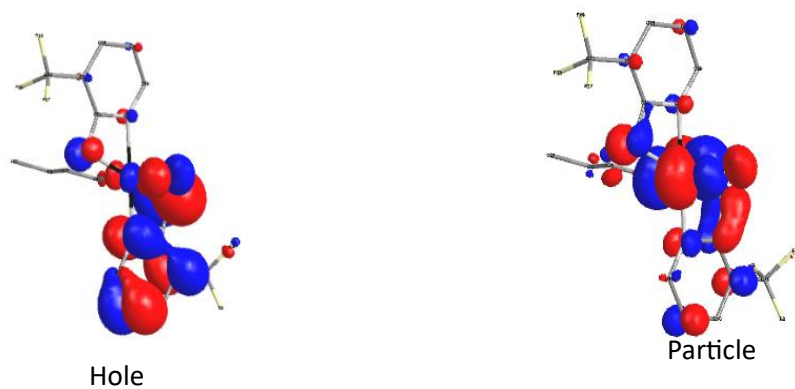

Figure S 12: Particle 1 (Top) and Hole (Bottom) for the maximum absorption transition for **[Ru-1-octahedral]**

## 5. Orbital Contributions for each NTO

Table S3 : Orbital contribution for the maximum absorption transition

| Complex             | Experimental Absorption Wavelength               | Theoretical Absorption wavelength | Major Orbitals involved with the transition with metal percentage | % of the transition | Normalized Metal contribution to the NTOs associated with the transition |
|---------------------|--------------------------------------------------|-----------------------------------|-------------------------------------------------------------------|---------------------|--------------------------------------------------------------------------|
| [Ag-1] <sup>7</sup> | -                                                | 190.523 nm (OS0.232)              | HOMO 21%→L+6 5%                                                   | 21%                 | Hole 17%<br>Particle 7%                                                  |
|                     |                                                  |                                   | H-1 0% →L+5 3%                                                    | 16%                 |                                                                          |
|                     |                                                  |                                   | HOMO 21%→ L+7 21%                                                 | 9%                  |                                                                          |
|                     |                                                  |                                   | H-1 0%→ L+2 1%                                                    | 8%                  |                                                                          |
|                     |                                                  |                                   | H-2 30%→L+2 1%                                                    | 7%                  |                                                                          |
|                     |                                                  |                                   | HOMO 21%→ L+8 51%                                                 | 7%                  |                                                                          |
| [Ag-2] <sup>8</sup> | 257 nm (23000 M <sup>-1</sup> cm <sup>-1</sup> ) | 228.539 nm (OS 0.622)             | H-14 56% → LUMO 1%                                                | 21%                 | Hole 42%<br>Particle 0%                                                  |
|                     |                                                  |                                   | H-9 19%→ L+1 1%                                                   | 18%                 |                                                                          |
|                     |                                                  |                                   | H-8 46%→ L+1 1%                                                   | 18%                 |                                                                          |
|                     |                                                  |                                   | H-19 46%→ LUMO 1%                                                 | 14%                 |                                                                          |
|                     | 351 nm (9700 M <sup>-1</sup> cm <sup>-1</sup> )  | 304.579 nm (OS 0.378)             | H-7 13%→ LUMO 1%                                                  | 83%                 | Hole 6%<br>Particle 1%                                                   |
|                     | 364 nm (9500 M <sup>-1</sup> cm <sup>-1</sup> )  |                                   |                                                                   |                     |                                                                          |
|                     | 467 nm (1800 M <sup>-1</sup> cm <sup>-1</sup> )  | 438.869 nm (OS 0.004)             | HOMO 22% → LUMO 1%                                                | 72%                 | Hole 29.2 %<br>Particle 1%                                               |

|                               |                                                        |                          |                                                        |     |                          |
|-------------------------------|--------------------------------------------------------|--------------------------|--------------------------------------------------------|-----|--------------------------|
| <b>[Ru-1]</b>                 | -                                                      | 481.775 nm<br>(OS 0.113) | $\alpha$ HOMO 31% $\rightarrow$ $\alpha$ LUMO<br>44%   | 85% | Hole 30%<br>Particle 10% |
| <b>[Ru-1-<br/>Octahedral]</b> | -                                                      | 496.217 nm<br>(OS 0.057) | $\beta$ HOMO 13% $\rightarrow$ $\beta$ LUMO 8%         | 49% | Hole 30%<br>Particle 70% |
|                               |                                                        |                          | $\beta$ HOMO-3 22% $\rightarrow$ $\beta$<br>LUMO+4 16% | 18% |                          |
| <b>[Ru-2]<sup>9</sup></b>     | 672 nm<br>(6729 M <sup>-1</sup><br>cm <sup>-1</sup> )  | 591.559 nm<br>(OS 0.260) | H-2 0% $\rightarrow$ LUMO 51%                          | 97% | Hole 0%<br>Particle 53%  |
|                               | 880 nm<br>(6944 M <sup>-1</sup><br>cm <sup>-1</sup> )  | 868.059 nm<br>(OS 0.038) | HOMO 0% $\rightarrow$ LUMO 65%                         | 83% | Hole 35%<br>Particle 3%  |
| <b>[Mo-1]</b>                 | -                                                      | 289.556 nm<br>(OS 0.468) | H-4 2% $\rightarrow$ L+1 1%                            | 23% | Hole 32%<br>Particle 2%  |
|                               |                                                        |                          | H-4 2% $\rightarrow$ LUMO 23%                          | 17% |                          |
|                               |                                                        |                          | HOMO 88% $\rightarrow$ L+4 1%                          | 10% |                          |
| <b>[Mo-2]<sup>10</sup></b>    | 521 nm<br>(46000 M <sup>-1</sup><br>cm <sup>-1</sup> ) | 436.520 nm<br>(OS 0.763) | HOMO 64% $\rightarrow$ LUMO 3%                         | 67% | Hole 67%<br>Particle 16% |
|                               |                                                        |                          | HOMO 64% $\rightarrow$ L+6 51%                         | 16% |                          |

## 6. Data Tables for the MVR analysis

Table S4 : Data Table 1 for MVR analysis

| Point # | Complex                | Solvent | $\lambda$ | $M_H$        | $M_P$        | $ M_H - M_P $ |
|---------|------------------------|---------|-----------|--------------|--------------|---------------|
| 1       | [Ag-2-A] <sup>8</sup>  | DCM     | 230.592   | 0.16         | 0.0077777778 | 0.1522222222  |
| 2       | [Ag-2] <sup>8</sup>    | DCM     | 228.539   | 0.42         | 0.01         | 0.41          |
| 3       | [Ru-2] <sup>9</sup>    | EtOAc   | 636.211   | 0            | 0.5          | 0.5           |
| 4       | [Mo-2] <sup>10</sup>   | THF     | 436.459   | 0.67         | 0.16         | 0.51          |
| 5       | [Rh-2-A] <sup>11</sup> | DMF     | 306.559   | 0.206666667  | 0.4544444444 | 0.2477777778  |
| 6       | [Rh-2-B] <sup>12</sup> | CH3CN   | 254.118   | 0.21         | 0.11         | 0.1           |
| 7       | [Rh-2-C] <sup>13</sup> | CH3CN   | 272.632   | 0.08         | 0.0277777778 | 0.0522222222  |
| 8       | [Rh-2-D] <sup>14</sup> | CH3CN   | 256.905   | 0.0244444444 | 0.1225       | 0.0980555556  |
| 9       | [Rh-2-E] <sup>14</sup> | CH3CN   | 285.292   | 0.308888889  | 0.216666667  | 0.0922222222  |
| 10      | [Rh-2-F] <sup>14</sup> | CH3CN   | 285.877   | 0.357        | 0.264        | 0.093         |
| 11      | [Rh-2-G] <sup>13</sup> | CH3CN   | 250.581   | 0.20125      | 0.305        | 0.10375       |
| 12      | [Rh-2-H] <sup>13</sup> | CH3CN   | 237.246   | 0.28         | 0.273        | 0.007         |
| 13      | [Mo-2-A] <sup>15</sup> | THF     | 396.434   | 0.69         | 0.04         | 0.65          |
| 14      | [Mo-2-B] <sup>15</sup> | THF     | 409.043   | 0.68         | 0.13         | 0.55          |

Table S5 : Data Table 2 for MVR analysis

| Point # | New Name | M-M bond order Wiberg | M-M bond order NAO | M-M MO bond order | FSR         | $\epsilon$ |
|---------|----------|-----------------------|--------------------|-------------------|-------------|------------|
| 1       | [Ag-2-A] | 0.1064                | 0.2736             | 0.4718            | 1.144884242 | 8.93       |
| 2       | [Ag-2]   | 0.0832                | 0.2374             | 0.3084            | 1.144884242 | 8.93       |
| 3       | [Ru-2]   | 0.8819                | 0.5793             | 1.1204            | 0.975020145 | 5.9867     |
| 4       | [Mo-2]   | 3.093                 | 1.4682             | 0.4104            | 0.814484895 | 7.4257     |
| 5       | [Rh-2-A] | 0.7691                | 0.4695             | 0.7714            | 0.947473937 | 37.219     |
| 6       | [Rh-2-B] | 0.6956                | 0.4484             | 0.6822            | 1.005613472 | 35.688     |
| 7       | [Rh-2-C] | 0.7178                | 0.4497             | 0.7423            | 0.993985565 | 35.688     |
| 8       | [Rh-2-D] | 0.7954                | 0.4294             | 1.3886            | 1.023656776 | 35.688     |
| 9       | [Rh-2-E] | 0.7948                | 0.4309             | 1.2399            | 1.023255814 | 35.688     |
| 10      | [Rh-2-F] | 0.786                 | 0.4309             | 0.8587            | 1.023656776 | 35.688     |
| 11      | [Rh-2-G] | 0.6722                | 0.4486             | 0.9075            | 0.998396151 | 35.688     |
| 12      | [Rh-2-H] | 0.7734                | 0.4454             | 0.7799            | 0.977947073 | 35.688     |
| 13      | [Mo-2-A] | 3.28                  | 1.583              | 0.1488            | 0.815863672 | 7.4257     |
| 14      | [Mo-2-B] | 3.2459                | 1.6375             | -0.077            | 0.816034082 | 7.4257     |

Table S6 : Data Table 3 MVR analysis

| Point # | New Name | Oxidation state | <i>d</i> electron count | NBO Charges | $\Delta E_{(\text{HOMO-LUMO})}$ | Oscillator strength |
|---------|----------|-----------------|-------------------------|-------------|---------------------------------|---------------------|
| 1       | [Ag-2-A] | 1               | 10                      | 0.667       | 5.265                           | 0.45                |
| 2       | [Ag-2]   | 1               | 10                      | 0.7247      | 5.359                           | 0.622               |
| 3       | [Ru-2]   | 3               | 5                       | 0.2836      | 1.976                           | 0.226               |
| 4       | [Mo-2]   | 2               | 4                       | 0.6666      | 4.616                           | 0.761               |
| 5       | [Rh-2-A] | 2               | 7                       | 0.5231      | 4.656                           | 0.556               |
| 6       | [Rh2-B]  | 2               | 7                       | 0.4047      | 4.373                           | 0.139               |
| 7       | [Rh2-C]  | 2               | 7                       | 0.4334      | 4.304                           | 0.238               |
| 8       | [Rh-2-D] | 2               | 7                       | 0.6104      | 4.506                           | 1.88                |
| 9       | [Rh-2-E] | 2               | 7                       | 0.606       | 4.481                           | 1.984               |
| 10      | [Rh-2-F] | 2               | 7                       | 0.6074      | 4.337                           | 1.685               |
| 11      | [Rh-2-G] | 2               | 7                       | 0.3811      | 4.516                           | 0.516               |
| 12      | [Rh-2-H] | 2               | 7                       | 0.5701      | 4.744                           | 0.223               |
| 13      | [Mo-2-A] | 2               | 4                       | 0.8188      | 5.165                           | 1.017               |
| 14      | [Mo-2-B] | 2               | 4                       | 0.5283      | 4.887                           | 0.919               |

## 7. MVR Plots

### 7.1 MVR analysis with Metal percentage in the *hole* ( $M_H$ ) and Molecular Orbital Bond Order

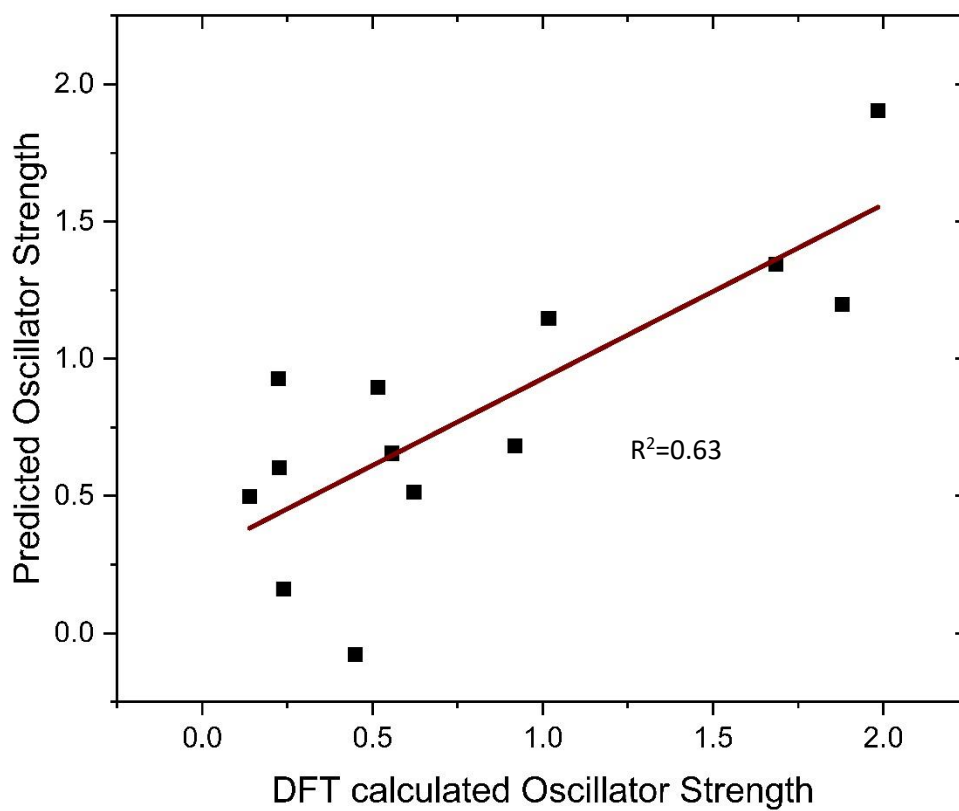

Figure S 13: MVR analysis with metal percentage in the *hole* ( $M_H$ ) and Molecular Orbital Bond Order

$$\text{Oscillator Strength} = 3.47 M_H + 1.90 \text{BO}_{\text{MO}} - 1.53 \text{ (equation S1)}$$



7.2 MVR analysis with Metal percentage in the *hole* ( $M_H$ ), Molecular Orbital Bond Order and HOMO-LUMO Energy gap ( $\Delta E_{\text{HOMO-LUMO}}$ )

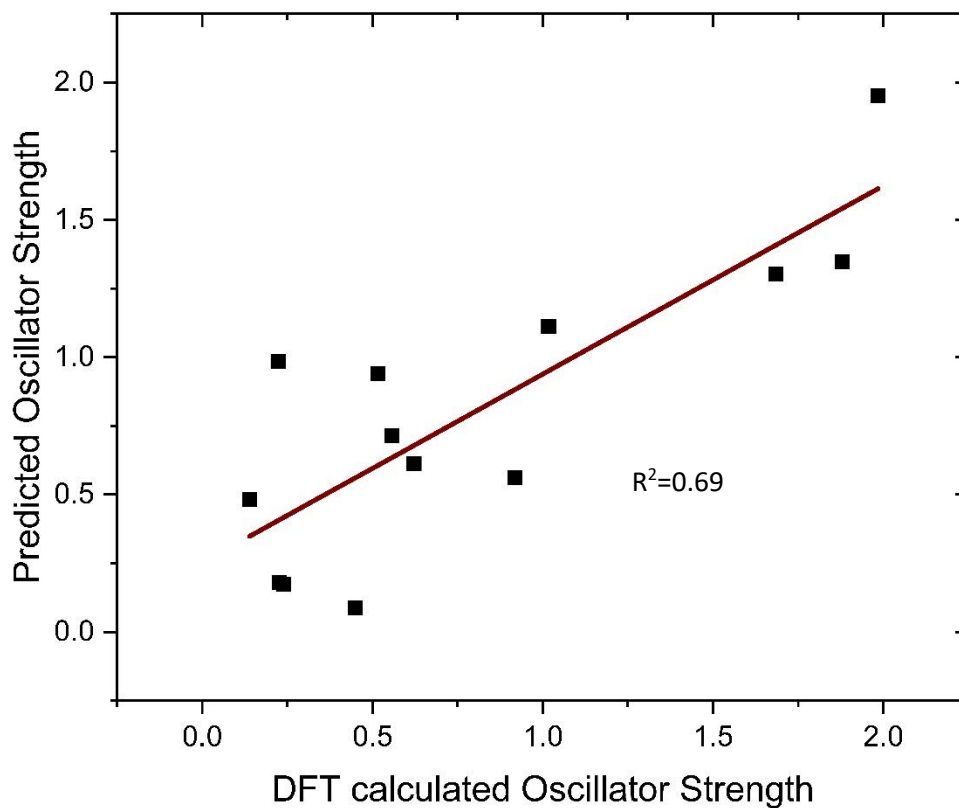

Figure S 14: MVR analysis with metal percentage in the *hole* ( $M_H$ ), Molecular Orbital Bond Order and HOMO-LUMO Energy gap

$$\text{Oscillator Strength} = 3.20 M_H + 2.02 \text{BO}_{\text{MO}} + 0.21 \Delta E_{\text{LUMO-HOMO}} - 0.01 \varepsilon - 3.06 \text{ (equation S2)}$$

### 7.3 MVR analysis with Metal percentage in the *hole* ( $M_H$ ), Molecular Orbital Bond Order, HOMO-LUMO Energy gap ( $\Delta E_{\text{HOMO-LUMO}}$ ) and Dielectric constant ( $\epsilon$ )

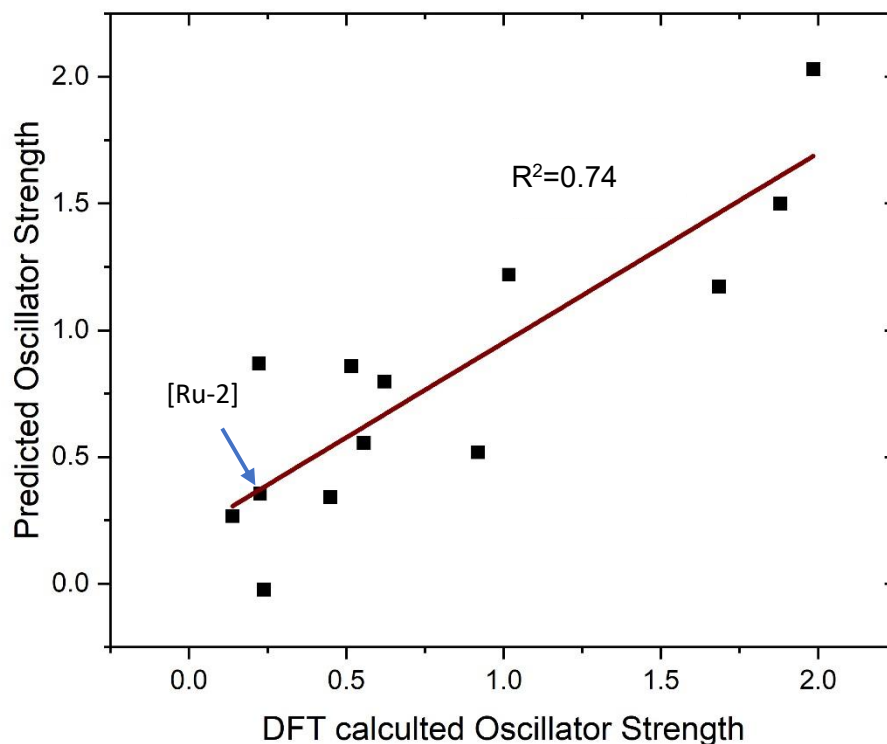

Figure S 15 : MVR analysis with metal percentage in the *hole* ( $M_H$ ), Molecular Orbital Bond Order, HOMO-LUMO Energy gap and Dielectric constant

Only the outlier **[Ru-2]** is directly aligning with the plot line, all the relevant data are scattered giving a low  $R^2$  value.

$$\text{Oscillator Strength} = 3.21 M_H + 2.52 B_{\text{MO}} + 0.35 \Delta E_{\text{LUMO-HOMO}} - 0.01 \epsilon - 3.06 \quad (\text{equation S3})$$

## 7.4 Excluding one metal parameter at a time

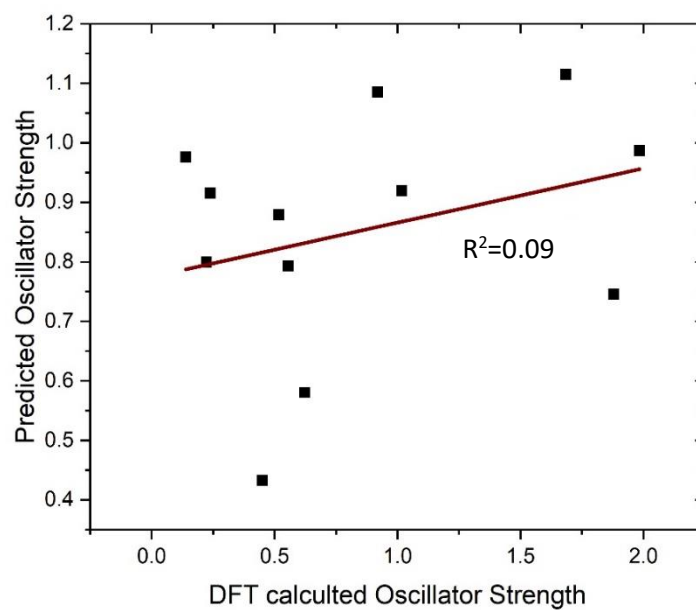

Figure S 16: MVR analysis without the Molecular Orbital Bond Order

$$\text{Oscillator Strength} = 0.79 M_H - 0.62 \Delta E_{\text{LUMO-HOMO}} - 0.002 \epsilon + 3.611 \text{ (equation S4)}$$

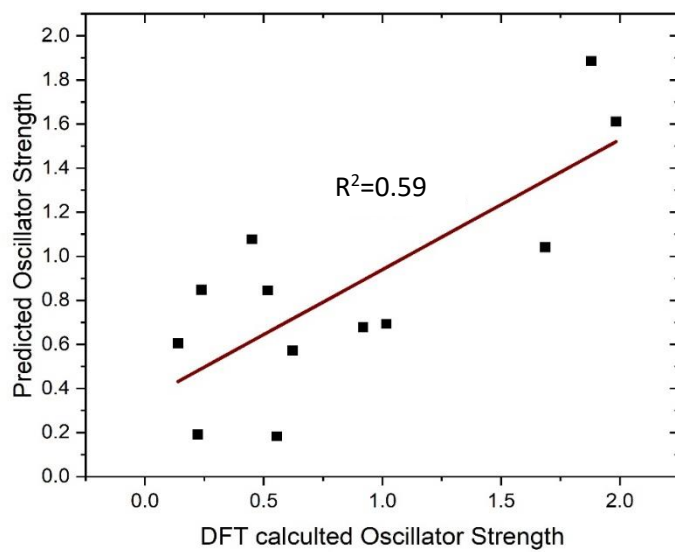

Figure S 17: MVR analysis without the metal percentage in the *hole* ( $M_H$ )

$$\text{Oscillator Strength} = 2.12B_{\text{OMO}} - 1.67\Delta E_{\text{LUMO-HOMO}} - 0.09\varepsilon + 9.69 \text{ (equation S5)}$$

## 8. Replacing $M_H$ with difference between $M_H$ and $M_P$

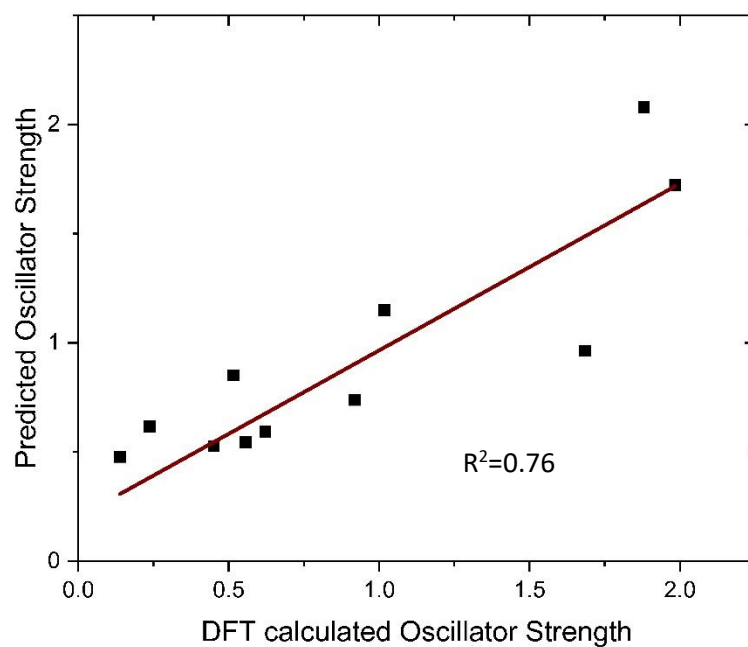

Figure S 18: Replacing  $M_H$  with difference between  $M_H$  and  $M_P$

Oscillator strength =  $2.40 \Delta(M_H - M_P) + 2.54 BO_{MO} - 0.06\epsilon - 1.46\Delta E_{LUMO-HOMO}$  (equation S6)

## 9. Calculated NBOs

Table S7 : Calculated NBOs of [Ag-1]

| MO      | Number | Energy/eV | Contribution (100% =1.00) |         |              |
|---------|--------|-----------|---------------------------|---------|--------------|
| HOMO-14 | 99     | -10.614   | 0.93                      | (Other) | 0.07 (Ag)    |
| HOMO-13 | 100    | -10.589   | 0.88                      | (Other) | 0.12 (Ag)    |
| HOMO-12 | 101    | -10.523   | 0.79                      | (Other) | 0.21 (Ag)    |
| HOMO-11 | 102    | -10.462   | 0.74                      | (Other) | 0.26 (Ag)    |
| HOMO-10 | 103    | -10.44    | 0.98                      | (Other) | 0.02 (Ag)    |
| HOMO-9  | 104    | -10.347   | 0.81                      | (Other) | 0.19 (Ag)    |
| HOMO-8  | 105    | -10.251   | 0.96                      | (Other) | 0.04 (Ag)    |
| HOMO-7  | 106    | -9.869    | 0.65                      | (Ag)    | 0.35 (Other) |
| HOMO-6  | 107    | -9.843    | 0.58                      | (Ag)    | 0.42 (Other) |
| HOMO-5  | 108    | -9.713    | 0.52                      | (Ag)    | 0.48 (Other) |
| HOMO-4  | 109    | -9.355    | 0.91                      | (Other) | 0.09 (Ag)    |
| HOMO-3  | 110    | -8.971    | 0.53                      | (Ag)    | 0.47 (Other) |
| HOMO-2  | 111    | -8.657    | 0.7                       | (Other) | 0.3 (Ag)     |
| HOMO-1  | 112    | -8.176    | 1                         | (Other) | 0 (Ag)       |
| HOMO    | 113    | -7.725    | 0.79                      | (Other) | 0.21 (Ag)    |
| LUMO    | 114    | -1.432    | 0.98                      | (Other) | 0.02 (Ag)    |
| LUMO+1  | 115    | -0.706    | 0.88                      | (Other) | 0.12 (Ag)    |
| LUMO+2  | 116    | -0.152    | 0.99                      | (Other) | 0.01 (Ag)    |
| LUMO+3  | 117    | 0.314     | 0.7                       | (Other) | 0.3 (Ag)     |
| LUMO+4  | 118    | 0.727     | 0.54                      | (Other) | 0.46 (Ag)    |
| LUMO+5  | 119    | 0.9       | 0.97                      | (Other) | 0.03 (Ag)    |
| LUMO+6  | 120    | 1.018     | 0.95                      | (Other) | 0.05 (Ag)    |
| LUMO+7  | 121    | 1.447     | 0.79                      | (Ag)    | 0.21 (Other) |
| LUMO+8  | 122    | 1.52      | 0.51                      | (Ag)    | 0.49 (Other) |
| LUMO+9  | 123    | 1.656     | 0.79                      | (Other) | 0.21 (Ag)    |
| LUMO+10 | 124    | 1.852     | 0.56                      | (Other) | 0.44 (Ag)    |
| LUMO+11 | 125    | 2.057     | 0.68                      | (Other) | 0.32 (Ag)    |
| LUMO+12 | 126    | 2.077     | 0.86                      | (Ag)    | 0.14 (Other) |
| LUMO+13 | 127    | 3.877     | 0.89                      | (Other) | 0.11 (Ag)    |
| LUMO+14 | 128    | 4.13      | 0.58                      | (Other) | 0.42 (Ag)    |

Table S8 : Calculated NBOs of [Ag-2]

| MO             | Number | Energy/eV | Contribution |         |      |         |
|----------------|--------|-----------|--------------|---------|------|---------|
| <b>HOMO-13</b> | 205    | -9.753    | 0.65         | (Ag)    | 0.35 | (Other) |
| <b>HOMO-12</b> | 206    | -9.669    | 0.57         | (Ag)    | 0.43 | (Other) |
| <b>HOMO-11</b> | 207    | -9.4      | 0.56         | (Other) | 0.44 | (Ag)    |
| <b>HOMO-10</b> | 208    | -9.329    | 0.58         | (Ag)    | 0.42 | (Other) |
| <b>HOMO-9</b>  | 209    | -9.314    | 0.81         | (Other) | 0.19 | (Ag)    |
| <b>HOMO-8</b>  | 210    | -9.154    | 0.54         | (Other) | 0.46 | (Ag)    |
| <b>HOMO-7</b>  | 211    | -9.066    | 0.87         | (Other) | 0.13 | (Ag)    |
| <b>HOMO-6</b>  | 212    | -8.837    | 0.57         | (Ag)    | 0.43 | (Other) |
| <b>HOMO-5</b>  | 213    | -8.707    | 0.51         | (Other) | 0.49 | (Ag)    |
| <b>HOMO-4</b>  | 214    | -8.667    | 0.51         | (Ag)    | 0.49 | (Other) |
| <b>HOMO-3</b>  | 215    | -8.091    | 1            | (Other) | 0    | (Ag)    |
| <b>HOMO-2</b>  | 216    | -8.089    | 1            | (Other) | 0    | (Ag)    |
| <b>HOMO-1</b>  | 217    | -7.783    | 0.9          | (Other) | 0.1  | (Ag)    |
| <b>HOMO</b>    | 218    | -7.645    | 0.78         | (Other) | 0.22 | (Ag)    |
| <b>LUMO</b>    | 219    | -2.286    | 0.99         | (Other) | 0.01 | (Ag)    |
| <b>LUMO+1</b>  | 220    | -1.317    | 0.99         | (Other) | 0.01 | (Ag)    |
| <b>LUMO+2</b>  | 221    | -0.97     | 0.74         | (Other) | 0.26 | (Ag)    |
| <b>LUMO+3</b>  | 222    | -0.51     | 0.93         | (Other) | 0.07 | (Ag)    |
| <b>LUMO+4</b>  | 223    | 0.098     | 0.97         | (Other) | 0.03 | (Ag)    |
| <b>LUMO+5</b>  | 224    | 0.313     | 0.88         | (Other) | 0.12 | (Ag)    |
| <b>LUMO+6</b>  | 225    | 0.461     | 0.99         | (Other) | 0.01 | (Ag)    |
| <b>LUMO+7</b>  | 226    | 0.714     | 0.85         | (Other) | 0.15 | (Ag)    |
| <b>LUMO+8</b>  | 227    | 0.798     | 0.59         | (Other) | 0.41 | (Ag)    |
| <b>LUMO+9</b>  | 228    | 0.966     | 0.97         | (Other) | 0.03 | (Ag)    |
| <b>LUMO+10</b> | 229    | 1.019     | 0.99         | (Other) | 0.01 | (Ag)    |
| <b>LUMO+11</b> | 230    | 1.047     | 0.77         | (Other) | 0.23 | (Ag)    |
| <b>LUMO+12</b> | 231    | 1.14      | 0.95         | (Other) | 0.05 | (Ag)    |
| <b>LUMO+13</b> | 232    | 1.214     | 0.57         | (Other) | 0.43 | (Ag)    |
| <b>LUMO+14</b> | 233    | 1.424     | 0.73         | (Ag)    | 0.27 | (Other) |

Table S9 : Calculated NBOs of [Mo-1]

| MO      | Number | Energy/eV | Contribution |         |      |         |
|---------|--------|-----------|--------------|---------|------|---------|
| HOMO-14 | 148    | -9.097    | 0.97         | (Other) | 0.03 | (Mo)    |
| HOMO-13 | 149    | -8.83     | 1            | (Other) | 0    | (Mo)    |
| HOMO-12 | 150    | -8.828    | 1            | (Other) | 0    | (Mo)    |
| HOMO-11 | 151    | -8.618    | 0.99         | (Other) | 0.01 | (Mo)    |
| HOMO-10 | 152    | -8.583    | 0.99         | (Other) | 0.01 | (Mo)    |
| HOMO-9  | 153    | -8.539    | 1            | (Other) | 0    | (Mo)    |
| HOMO-8  | 154    | -8.454    | 1            | (Other) | 0    | (Mo)    |
| HOMO-7  | 155    | -8.422    | 0.99         | (Other) | 0.01 | (Mo)    |
| HOMO-6  | 156    | -8.324    | 1            | (Other) | 0    | (Mo)    |
| HOMO-5  | 157    | -7.979    | 0.97         | (Other) | 0.03 | (Mo)    |
| HOMO-4  | 158    | -7.891    | 0.98         | (Other) | 0.02 | (Mo)    |
| HOMO-3  | 159    | -7.226    | 0.94         | (Other) | 0.06 | (Mo)    |
| HOMO-2  | 160    | -6.959    | 0.97         | (Other) | 0.03 | (Mo)    |
| HOMO-1  | 161    | -5.909    | 0.85         | (Mo)    | 0.15 | (Other) |
| HOMO    | 162    | -5.841    | 0.88         | (Mo)    | 0.12 | (Other) |
| LUMO    | 163    | -1.135    | 0.77         | (Other) | 0.23 | (Mo)    |
| LUMO+1  | 164    | -1.035    | 0.9          | (Other) | 0.1  | (Mo)    |
| LUMO+2  | 165    | -0.057    | 0.62         | (Mo)    | 0.38 | (Other) |
| LUMO+3  | 166    | 0.046     | 0.63         | (Mo)    | 0.37 | (Other) |
| LUMO+4  | 167    | 0.677     | 0.9          | (Other) | 0.1  | (Mo)    |
| LUMO+5  | 168    | 0.685     | 0.96         | (Other) | 0.04 | (Mo)    |
| LUMO+6  | 169    | 0.691     | 1            | (Other) | 0    | (Mo)    |
| LUMO+7  | 170    | 0.693     | 0.94         | (Other) | 0.06 | (Mo)    |
| LUMO+8  | 171    | 0.818     | 0.96         | (Other) | 0.04 | (Mo)    |
| LUMO+9  | 172    | 0.851     | 0.64         | (Other) | 0.36 | (Mo)    |
| LUMO+10 | 173    | 0.958     | 0.73         | (Other) | 0.27 | (Mo)    |
| LUMO+11 | 174    | 1.04      | 0.83         | (Other) | 0.17 | (Mo)    |
| LUMO+12 | 175    | 1.117     | 0.93         | (Other) | 0.07 | (Mo)    |
| LUMO+13 | 176    | 1.217     | 0.94         | (Other) | 0.06 | (Mo)    |
| LUMO+14 | 177    | 1.547     | 0.87         | (Other) | 0.13 | (Mo)    |



Table S10 : Calculated NBOs of [Mo-2]

| MO      | Number | Energy/eV | Contribution |         |      |         |
|---------|--------|-----------|--------------|---------|------|---------|
| HOMO-14 | 310    | -8.249    | 0.95         | (Other) | 0.05 | (Mo)    |
| HOMO-13 | 311    | -8.248    | 0.96         | (Other) | 0.04 | (Mo)    |
| HOMO-12 | 312    | -8.24     | 1            | (Other) | 0    | (Mo)    |
| HOMO-11 | 313    | -8.089    | 0.67         | (Mo)    | 0.33 | (Other) |
| HOMO-10 | 314    | -8.088    | 0.68         | (Mo)    | 0.32 | (Other) |
| HOMO-9  | 315    | -7.942    | 0.95         | (Other) | 0.05 | (Mo)    |
| HOMO-8  | 316    | -7.743    | 0.92         | (Other) | 0.08 | (Mo)    |
| HOMO-7  | 317    | -7.704    | 0.99         | (Other) | 0.01 | (Mo)    |
| HOMO-6  | 318    | -7.627    | 0.94         | (Other) | 0.06 | (Mo)    |
| HOMO-5  | 319    | -7.626    | 0.94         | (Other) | 0.06 | (Mo)    |
| HOMO-4  | 320    | -7.516    | 0.74         | (Mo)    | 0.26 | (Other) |
| HOMO-3  | 321    | -6.89     | 0.9          | (Other) | 0.1  | (Mo)    |
| HOMO-2  | 322    | -6.801    | 0.82         | (Other) | 0.18 | (Mo)    |
| HOMO-1  | 323    | -6.801    | 0.82         | (Other) | 0.18 | (Mo)    |
| HOMO    | 324    | -5.421    | 0.64         | (Mo)    | 0.36 | (Other) |
| LUMO    | 325    | -0.805    | 0.97         | (Other) | 0.03 | (Mo)    |
| LUMO+1  | 326    | -0.805    | 0.97         | (Other) | 0.03 | (Mo)    |
| LUMO+2  | 327    | -0.595    | 0.99         | (Other) | 0.01 | (Mo)    |
| LUMO+3  | 328    | -0.223    | 0.89         | (Other) | 0.11 | (Mo)    |
| LUMO+4  | 329    | 0.156     | 0.75         | (Mo)    | 0.25 | (Other) |
| LUMO+5  | 330    | 0.393     | 0.76         | (Other) | 0.24 | (Mo)    |
| LUMO+6  | 331    | 0.632     | 0.51         | (Mo)    | 0.49 | (Other) |
| LUMO+7  | 332    | 0.632     | 0.51         | (Mo)    | 0.49 | (Other) |
| LUMO+8  | 333    | 0.64      | 0.95         | (Other) | 0.05 | (Mo)    |
| LUMO+9  | 334    | 0.653     | 0.95         | (Other) | 0.05 | (Mo)    |
| LUMO+10 | 335    | 0.731     | 0.98         | (Other) | 0.02 | (Mo)    |
| LUMO+11 | 336    | 0.735     | 0.93         | (Other) | 0.07 | (Mo)    |
| LUMO+12 | 337    | 0.75      | 0.98         | (Other) | 0.02 | (Mo)    |
| LUMO+13 | 338    | 0.752     | 1            | (Other) | 0    | (Mo)    |
| LUMO+14 | 339    | 0.752     | 1            | (Other) | 0    | (Mo)    |

Table S11 : Calculated NBOs of [Ru-1]

| MO               | Number | Energy/eV | Contribution |         |       |         |
|------------------|--------|-----------|--------------|---------|-------|---------|
| $\alpha$ HOMO-13 | 80     | -12.255   | 0.68         | (Other) | 0.32  | (Ru)    |
| $\alpha$ HOMO-12 | 81     | -11.674   | 0.92         | (Other) | 0.08  | (Ru)    |
| $\alpha$ HOMO-11 | 82     | -11.292   | 0.96         | (Other) | 0.04  | (Ru)    |
| $\alpha$ HOMO-10 | 83     | -10.938   | 0.86         | (Other) | 0.14  | (Ru)    |
| $\alpha$ HOMO-9  | 84     | -10.838   | 0.9          | (Other) | 0.1   | (Ru)    |
| $\alpha$ HOMO-8  | 85     | -10.67    | 0.97         | (Other) | 0.03  | (Ru)    |
| $\alpha$ HOMO-7  | 86     | -10.541   | 0.82         | (Other) | 0.18  | (Ru)    |
| $\alpha$ HOMO-6  | 87     | -9.926    | 0.71         | (Other) | 0.29  | (Ru)    |
| $\alpha$ HOMO-5  | 88     | -9.487    | 0.85         | (Other) | 0.15  | (Ru)    |
| $\alpha$ HOMO-4  | 89     | -9.222    | 0.56         | (Other) | 0.44  | (Ru)    |
| $\alpha$ HOMO-3  | 90     | -8.698    | 0.51         | (Other) | 0.49  | (Ru)    |
| $\alpha$ HOMO-2  | 91     | -8.207    | 0.5          | (Ru)    | 0.5   | (Other) |
| $\alpha$ HOMO-1  | 92     | -7.96     | 0.98         | (Other) | 0.02  | (Ru)    |
| $\alpha$ HOMO    | 93     | -7.448    | 0.76         | (Other) | 0.24  | (Ru)    |
| $\alpha$ LUMO    | 94     | -1.229    | 0.52         | (Ru)    | 0.48  | (Other) |
| $\alpha$ LUMO+1  | 95     | -0.663    | 0.99         | (Other) | 0.01  | (Ru)    |
| $\alpha$ LUMO+2  | 96     | -0.533    | 0.87         | (Other) | 0.13  | (Ru)    |
| $\alpha$ LUMO+3  | 97     | 0.325     | 0.53         | (Ru)    | 0.47  | (Other) |
| $\alpha$ LUMO+4  | 98     | 0.339     | 0.86         | (Other) | 0.14  | (Ru)    |
| $\alpha$ LUMO+5  | 99     | 0.456     | 0.87         | (Other) | 0.13  | (Ru)    |
| $\alpha$ LUMO+6  | 100    | 1.251     | 0.93         | (Ru)    | 0.07  | (Other) |
| $\alpha$ LUMO+7  | 101    | 1.428     | 0.98         | (Ru)    | 0.02  | (Other) |
| $\alpha$ LUMO+8  | 102    | 1.641     | 1.06         | (Ru)    | -0.06 | (Other) |
| $\alpha$ LUMO+9  | 103    | 2.26      | 1.28         | (Ru)    | -0.28 | (Other) |
| $\alpha$ LUMO+10 | 104    | 3.234     | 0.98         | (Other) | 0.02  | (Ru)    |
| $\alpha$ LUMO+11 | 105    | 3.272     | 0.99         | (Other) | 0.01  | (Ru)    |
| $\alpha$ LUMO+12 | 106    | 3.365     | 0.99         | (Other) | 0.01  | (Ru)    |
| $\alpha$ LUMO+13 | 107    | 3.365     | 0.99         | (Other) | 0.01  | (Ru)    |
| $\alpha$ LUMO+14 | 108    | 4.152     | 0.95         | (Other) | 0.05  | (Ru)    |

| MO              | Number | Energy/eV | Contribution |         |      |      |
|-----------------|--------|-----------|--------------|---------|------|------|
| $\beta$ HOMO-14 | 78     | -12.845   | 0.98         | (Other) | 0.02 | (Ru) |
| $\beta$ HOMO-13 | 79     | -12.792   | 0.82         | (Other) | 0.18 | (Ru) |
| $\beta$ HOMO-12 | 80     | -11.685   | 0.89         | (Other) | 0.11 | (Ru) |
| $\beta$ HOMO-11 | 81     | -11.646   | 0.92         | (Other) | 0.08 | (Ru) |
| $\beta$ HOMO-10 | 82     | -11.152   | 0.96         | (Other) | 0.04 | (Ru) |
| $\beta$ HOMO-9  | 83     | -10.836   | 0.91         | (Other) | 0.09 | (Ru) |
| $\beta$ HOMO-8  | 84     | -10.757   | 0.94         | (Other) | 0.06 | (Ru) |
| $\beta$ HOMO-7  | 85     | -10.658   | 0.99         | (Other) | 0.01 | (Ru) |
| $\beta$ HOMO-6  | 86     | -10.164   | 0.85         | (Other) | 0.15 | (Ru) |

|                 |     |        |      |         |       |         |
|-----------------|-----|--------|------|---------|-------|---------|
| <b>βHOMO-5</b>  | 87  | -9.639 | 0.78 | (Other) | 0.22  | (Ru)    |
| <b>βHOMO-4</b>  | 88  | -9.357 | 0.93 | (Other) | 0.07  | (Ru)    |
| <b>βHOMO-3</b>  | 89  | -8.637 | 0.62 | (Ru)    | 0.38  | (Other) |
| <b>βHOMO-2</b>  | 90  | -8.299 | 0.74 | (Other) | 0.26  | (Ru)    |
| <b>βHOMO-1</b>  | 91  | -7.96  | 0.58 | (Ru)    | 0.42  | (Other) |
| <b>βHOMO</b>    | 92  | -7.687 | 0.98 | (Other) | 0.02  | (Ru)    |
| <b>βLUMO</b>    | 93  | -1.925 | 0.67 | (Ru)    | 0.33  | (Other) |
| <b>βLUMO+1</b>  | 94  | -1.059 | 0.55 | (Other) | 0.45  | (Ru)    |
| <b>βLUMO+2</b>  | 95  | -0.649 | 0.98 | (Other) | 0.02  | (Ru)    |
| <b>βLUMO+3</b>  | 96  | -0.461 | 0.78 | (Other) | 0.22  | (Ru)    |
| <b>βLUMO+4</b>  | 97  | 0.451  | 0.89 | (Other) | 0.11  | (Ru)    |
| <b>βLUMO+5</b>  | 98  | 0.634  | 0.82 | (Other) | 0.18  | (Ru)    |
| <b>βLUMO+6</b>  | 99  | 0.727  | 0.66 | (Ru)    | 0.34  | (Other) |
| <b>βLUMO+7</b>  | 100 | 1.272  | 0.92 | (Ru)    | 0.08  | (Other) |
| <b>βLUMO+8</b>  | 101 | 1.449  | 0.96 | (Ru)    | 0.04  | (Other) |
| <b>βLUMO+9</b>  | 102 | 1.653  | 1.04 | (Ru)    | -0.04 | (Other) |
| <b>βLUMO+9</b>  | 103 | 2.3    | 1.27 | (Ru)    | -0.27 | (Other) |
| <b>βLUMO+11</b> | 104 | 3.237  | 0.98 | (Other) | 0.02  | (Ru)    |
| <b>βLUMO+12</b> | 105 | 3.279  | 0.99 | (Other) | 0.01  | (Ru)    |
| <b>βLUMO+13</b> | 106 | 3.39   | 0.99 | (Other) | 0.01  | (Ru)    |
| <b>βLUMO+14</b> | 107 | 3.401  | 0.99 | (Other) | 0.01  | (Ru)    |

Table S 12: Calculated NBOs of [Ru-1-octahedral]

| <b>MO</b>       | <b>Number</b> | <b>Energy</b> | <b>Contribution</b> |         |      |         |
|-----------------|---------------|---------------|---------------------|---------|------|---------|
| <b>αHOMO-20</b> | 89            | -13.166       | 0.73                | (Other) | 0.27 | (Ru)    |
| <b>αHOMO-19</b> | 90            | -12.777       | 0.99                | (Other) | 0.01 | (Ru)    |
| <b>αHOMO-18</b> | 91            | -12.688       | 1                   | (Other) | 0    | (Ru)    |
| <b>αHOMO-17</b> | 92            | -12.648       | 0.93                | (Other) | 0.07 | (Ru)    |
| <b>αHOMO-16</b> | 93            | -11.902       | 0.77                | (Other) | 0.23 | (Ru)    |
| <b>αHOMO-15</b> | 94            | -11.605       | 0.84                | (Other) | 0.16 | (Ru)    |
| <b>αHOMO-14</b> | 95            | -11.428       | 0.87                | (Other) | 0.13 | (Ru)    |
| <b>αHOMO-13</b> | 96            | -11.394       | 0.91                | (Other) | 0.09 | (Ru)    |
| <b>αHOMO-12</b> | 97            | -11.07        | 0.97                | (Other) | 0.03 | (Ru)    |
| <b>αHOMO-11</b> | 98            | -10.934       | 0.94                | (Other) | 0.06 | (Ru)    |
| <b>αHOMO-10</b> | 99            | -10.703       | 0.96                | (Other) | 0.04 | (Ru)    |
| <b>αHOMO-9</b>  | 100           | -10.56        | 0.96                | (Other) | 0.04 | (Ru)    |
| <b>αHOMO-8</b>  | 101           | -10.19        | 0.92                | (Other) | 0.08 | (Ru)    |
| <b>αHOMO-7</b>  | 102           | -10.139       | 0.96                | (Other) | 0.04 | (Ru)    |
| <b>αHOMO-6</b>  | 103           | -9.937        | 0.77                | (Other) | 0.23 | (Ru)    |
| <b>αHOMO-5</b>  | 104           | -9.302        | 0.81                | (Other) | 0.19 | (Ru)    |
| <b>αHOMO-4</b>  | 105           | -8.963        | 0.94                | (Ru)    | 0.06 | (Other) |
| <b>αHOMO-3</b>  | 106           | -8.585        | 0.78                | (Other) | 0.22 | (Ru)    |
| <b>αHOMO-2</b>  | 107           | -8.161        | 0.51                | (Ru)    | 0.49 | (Other) |

|                                   |     |        |      |         |       |         |
|-----------------------------------|-----|--------|------|---------|-------|---------|
| <b><math>\alpha</math>HOMO-1</b>  | 108 | -7.761 | 0.99 | (Other) | 0.01  | (Ru)    |
| <b><math>\alpha</math>HOMO</b>    | 109 | -7.295 | 0.87 | (Other) | 0.13  | (Ru)    |
| <b><math>\alpha</math>LUMO</b>    | 110 | -0.632 | 0.92 | (Other) | 0.08  | (Ru)    |
| <b><math>\alpha</math>LUMO+1</b>  | 111 | -0.381 | 0.96 | (Other) | 0.04  | (Ru)    |
| <b><math>\alpha</math>LUMO+2</b>  | 112 | -0.309 | 0.66 | (Other) | 0.34  | (Ru)    |
| <b><math>\alpha</math>LUMO+3</b>  | 113 | -0.122 | 0.79 | (Other) | 0.21  | (Ru)    |
| <b><math>\alpha</math>LUMO+4</b>  | 114 | 0.465  | 0.84 | (Other) | 0.16  | (Ru)    |
| <b><math>\alpha</math>LUMO+5</b>  | 115 | 0.756  | 0.96 | (Other) | 0.04  | (Ru)    |
| <b><math>\alpha</math>LUMO+6</b>  | 116 | 0.859  | 0.54 | (Ru)    | 0.46  | (Other) |
| <b><math>\alpha</math>LUMO+7</b>  | 117 | 1.254  | 0.99 | (Ru)    | 0.01  | (Other) |
| <b><math>\alpha</math>LUMO+8</b>  | 118 | 1.771  | 0.92 | (Ru)    | 0.08  | (Other) |
| <b><math>\alpha</math>LUMO+9</b>  | 119 | 1.779  | 1.07 | (Ru)    | -0.07 | (Other) |
| <b><math>\alpha</math>LUMO+10</b> | 120 | 2.69   | 1.01 | (Ru)    | -0.01 | (Other) |
| <b><math>\alpha</math>LUMO+11</b> | 121 | 3.259  | 0.78 | (Other) | 0.22  | (Ru)    |
| <b><math>\alpha</math>LUMO+12</b> | 122 | 3.323  | 0.99 | (Other) | 0.01  | (Ru)    |
| <b><math>\alpha</math>LUMO+13</b> | 123 | 3.391  | 0.99 | (Other) | 0.01  | (Ru)    |
| <b><math>\alpha</math>LUMO+14</b> | 124 | 3.436  | 0.99 | (Other) | 0.01  | (Ru)    |
| <b><math>\alpha</math>LUMO+15</b> | 125 | 3.54   | 0.99 | (Other) | 0.01  | (Ru)    |
| <b><math>\alpha</math>LUMO+16</b> | 126 | 4.207  | 0.93 | (Other) | 0.07  | (Ru)    |
| <b><math>\alpha</math>LUMO+17</b> | 127 | 4.289  | 0.95 | (Other) | 0.05  | (Ru)    |
| <b><math>\alpha</math>LUMO+18</b> | 128 | 4.506  | 0.97 | (Other) | 0.03  | (Ru)    |
| <b><math>\alpha</math>LUMO+19</b> | 129 | 4.915  | 0.9  | (Other) | 0.1   | (Ru)    |
| <b><math>\alpha</math>LUMO+20</b> | 130 | 5.057  | 0.95 | (Other) | 0.05  | (Ru)    |

| <b>MO</b>                        | <b>Number</b> | <b>Energy</b> | <b>Contribution</b> |         |      |         |
|----------------------------------|---------------|---------------|---------------------|---------|------|---------|
| <b><math>\beta</math>HOMO-20</b> | 89            | -13.166       | 0.73                | (Other) | 0.27 | (Ru)    |
| <b><math>\beta</math>HOMO-19</b> | 90            | -12.777       | 0.99                | (Other) | 0.01 | (Ru)    |
| <b><math>\beta</math>HOMO-18</b> | 91            | -12.688       | 1                   | (Other) | 0    | (Ru)    |
| <b><math>\beta</math>HOMO-17</b> | 92            | -12.648       | 0.93                | (Other) | 0.07 | (Ru)    |
| <b><math>\beta</math>HOMO-16</b> | 93            | -11.902       | 0.77                | (Other) | 0.23 | (Ru)    |
| <b><math>\beta</math>HOMO-15</b> | 94            | -11.605       | 0.84                | (Other) | 0.16 | (Ru)    |
| <b><math>\beta</math>HOMO-14</b> | 95            | -11.428       | 0.87                | (Other) | 0.13 | (Ru)    |
| <b><math>\beta</math>HOMO-13</b> | 96            | -11.394       | 0.91                | (Other) | 0.09 | (Ru)    |
| <b><math>\beta</math>HOMO-12</b> | 97            | -11.07        | 0.97                | (Other) | 0.03 | (Ru)    |
| <b><math>\beta</math>HOMO-11</b> | 98            | -10.934       | 0.94                | (Other) | 0.06 | (Ru)    |
| <b><math>\beta</math>HOMO-10</b> | 99            | -10.703       | 0.96                | (Other) | 0.04 | (Ru)    |
| <b><math>\beta</math>HOMO-9</b>  | 100           | -10.56        | 0.96                | (Other) | 0.04 | (Ru)    |
| <b><math>\beta</math>HOMO-8</b>  | 101           | -10.19        | 0.92                | (Other) | 0.08 | (Ru)    |
| <b><math>\beta</math>HOMO-7</b>  | 102           | -10.139       | 0.96                | (Other) | 0.04 | (Ru)    |
| <b><math>\beta</math>HOMO-6</b>  | 103           | -9.937        | 0.77                | (Other) | 0.23 | (Ru)    |
| <b><math>\beta</math>HOMO-5</b>  | 104           | -9.302        | 0.81                | (Other) | 0.19 | (Ru)    |
| <b><math>\beta</math>HOMO-4</b>  | 105           | -8.963        | 0.94                | (Ru)    | 0.06 | (Other) |

|                 |     |        |      |         |       |         |
|-----------------|-----|--------|------|---------|-------|---------|
| <b>βHOMO-3</b>  | 106 | -8.585 | 0.78 | (Other) | 0.22  | (Ru)    |
| <b>βHOMO-2</b>  | 107 | -8.161 | 0.51 | (Ru)    | 0.49  | (Other) |
| <b>βHOMO-1</b>  | 108 | -7.761 | 0.99 | (Other) | 0.01  | (Ru)    |
| <b>βHOMO</b>    | 109 | -7.295 | 0.87 | (Other) | 0.13  | (Ru)    |
| <b>βLUMO</b>    | 110 | -0.632 | 0.92 | (Other) | 0.08  | (Ru)    |
| <b>βLUMO+1</b>  | 111 | -0.381 | 0.96 | (Other) | 0.04  | (Ru)    |
| <b>βLUMO+2</b>  | 112 | -0.309 | 0.66 | (Other) | 0.34  | (Ru)    |
| <b>βLUMO+3</b>  | 113 | -0.122 | 0.79 | (Other) | 0.21  | (Ru)    |
| <b>βLUMO+4</b>  | 114 | 0.465  | 0.84 | (Other) | 0.16  | (Ru)    |
| <b>βLUMO+5</b>  | 115 | 0.756  | 0.96 | (Other) | 0.04  | (Ru)    |
| <b>βLUMO+6</b>  | 116 | 0.859  | 0.54 | (Ru)    | 0.46  | (Other) |
| <b>βLUMO+7</b>  | 117 | 1.254  | 0.99 | (Ru)    | 0.01  | (Other) |
| <b>βLUMO+8</b>  | 118 | 1.771  | 0.92 | (Ru)    | 0.08  | (Other) |
| <b>βLUMO+9</b>  | 119 | 1.779  | 1.07 | (Ru)    | -0.07 | (Other) |
| <b>βLUMO+9</b>  | 120 | 2.69   | 1.01 | (Ru)    | -0.01 | (Other) |
| <b>βLUMO+11</b> | 121 | 3.259  | 0.78 | (Other) | 0.22  | (Ru)    |
| <b>βLUMO+12</b> | 122 | 3.323  | 0.99 | (Other) | 0.01  | (Ru)    |
| <b>βLUMO+13</b> | 123 | 3.391  | 0.99 | (Other) | 0.01  | (Ru)    |
| <b>βLUMO+14</b> | 124 | 3.436  | 0.99 | (Other) | 0.01  | (Ru)    |
| <b>βLUMO+15</b> | 125 | 3.54   | 0.99 | (Other) | 0.01  | (Ru)    |
| <b>βLUMO+16</b> | 126 | 4.207  | 0.93 | (Other) | 0.07  | (Ru)    |
| <b>βLUMO+17</b> | 127 | 4.289  | 0.95 | (Other) | 0.05  | (Ru)    |
| <b>βLUMO+18</b> | 128 | 4.506  | 0.97 | (Other) | 0.03  | (Ru)    |
| <b>βLUMO+19</b> | 129 | 4.915  | 0.9  | (Other) | 0.1   | (Ru)    |
| <b>βLUMO+20</b> | 130 | 5.057  | 0.95 | (Other) | 0.05  | (Ru)    |

Table S13 : Calculated NBOs of [Ru-2]

| MO      | Number | Energy/eV | Contribution |         |       |         |
|---------|--------|-----------|--------------|---------|-------|---------|
| HOMO-14 | 171    | -10.597   | 0.98         | (Other) | 0.02  | (Ru)    |
| HOMO-13 | 172    | -10.531   | 0.96         | (Other) | 0.04  | (Ru)    |
| HOMO-12 | 173    | -10.248   | 0.87         | (Other) | 0.13  | (Ru)    |
| HOMO-11 | 174    | -10.23    | 0.76         | (Other) | 0.24  | (Ru)    |
| HOMO-10 | 175    | -10.105   | 0.76         | (Other) | 0.24  | (Ru)    |
| HOMO-9  | 176    | -10.017   | 0.8          | (Other) | 0.2   | (Ru)    |
| HOMO-8  | 177    | -9.337    | 0.79         | (Other) | 0.21  | (Ru)    |
| HOMO-7  | 178    | -9.187    | 0.73         | (Other) | 0.27  | (Ru)    |
| HOMO-6  | 179    | -8.96     | 0.56         | (Other) | 0.44  | (Ru)    |
| HOMO-5  | 180    | -8.833    | 0.6          | (Other) | 0.4   | (Ru)    |
| HOMO-4  | 181    | -8.547    | 0.55         | (Other) | 0.45  | (Ru)    |
| HOMO-3  | 182    | -8.104    | 0.77         | (Ru)    | 0.23  | (Other) |
| HOMO-2  | 183    | -7.858    | 1            | (Other) | 0     | (Ru)    |
| HOMO-1  | 184    | -7.599    | 0.99         | (Other) | 0.01  | (Ru)    |
| HOMO    | 185    | -7.533    | 0.75         | (Other) | 0.25  | (Ru)    |
| LUMO    | 186    | -3.509    | 0.51         | (Ru)    | 0.49  | (Other) |
| LUMO+1  | 187    | -2.999    | 0.77         | (Ru)    | 0.23  | (Other) |
| LUMO+2  | 188    | -0.731    | 0.95         | (Other) | 0.05  | (Ru)    |
| LUMO+3  | 189    | -0.721    | 0.98         | (Other) | 0.02  | (Ru)    |
| LUMO+4  | 190    | -0.711    | 0.99         | (Other) | 0.01  | (Ru)    |
| LUMO+5  | 191    | -0.616    | 1            | (Other) | 0     | (Ru)    |
| LUMO+6  | 192    | -0.002    | 0.69         | (Ru)    | 0.31  | (Other) |
| LUMO+7  | 193    | 0.375     | 0.93         | (Other) | 0.07  | (Ru)    |
| LUMO+8  | 194    | 0.4       | 0.95         | (Other) | 0.05  | (Ru)    |
| LUMO+9  | 195    | 0.622     | 0.94         | (Other) | 0.06  | (Ru)    |
| LUMO+10 | 196    | 0.674     | 0.99         | (Other) | 0.01  | (Ru)    |
| LUMO+11 | 197    | 0.873     | 0.57         | (Ru)    | 0.43  | (Other) |
| LUMO+12 | 198    | 1.199     | 0.95         | (Ru)    | 0.05  | (Other) |
| LUMO+13 | 199    | 1.402     | 0.56         | (Ru)    | 0.44  | (Other) |
| LUMO+14 | 200    | 1.675     | 1.03         | (Ru)    | -0.03 | (Other) |
| LUMO+15 | 201    | 1.688     | 1.07         | (Ru)    | -0.07 | (Other) |
| LUMO+16 | 202    | 1.751     | 1.05         | (Ru)    | -0.05 | (Other) |
| LUMO+17 | 203    | 2.023     | 0.98         | (Ru)    | 0.02  | (Other) |
| LUMO+18 | 204    | 2.031     | 0.98         | (Ru)    | 0.02  | (Other) |
| LUMO+19 | 205    | 3.158     | 0.67         | (Other) | 0.33  | (Ru)    |
| LUMO+20 | 206    | 3.167     | 0.98         | (Other) | 0.02  | (Ru)    |

## 10. Optimized Coordinates (Charge and Multiplicity added to the first line)

[Ag-1]

|     |             |             |             |
|-----|-------------|-------------|-------------|
| 0 1 |             |             |             |
| Ag  | 0.51665900  | 0.07531600  | -0.55458500 |
| S   | 3.13161000  | -1.52114000 | -0.44673300 |
| F   | 5.40304200  | -0.43780400 | 0.70412700  |
| F   | 4.02938400  | 1.06581000  | -0.22204200 |
| F   | 5.32587800  | -0.21622100 | -1.51914300 |
| O   | 2.31391700  | -1.25514700 | 0.93956400  |
| O   | 2.22261300  | -0.90011800 | -1.67534600 |
| O   | 3.83787600  | -2.93829500 | -0.69167900 |
| N   | 0.37988100  | 2.30605300  | 0.26932700  |
| N   | -1.64395100 | 0.38111100  | 0.22229600  |
| C   | -0.09445500 | 4.79270200  | 1.44013300  |
| H   | -0.27950000 | 5.76021200  | 1.89480500  |
| C   | -1.11514900 | 3.83364400  | 1.37273100  |
| H   | -2.10229700 | 4.03756500  | 1.77501900  |
| C   | -0.84037500 | 2.59470800  | 0.78027400  |
| C   | -1.88061100 | 1.54340600  | 0.71549800  |
| H   | -2.85865700 | 1.79930800  | 1.13278300  |
| C   | -2.65962100 | -0.63764400 | 0.15956200  |
| C   | -3.80283600 | -0.46251500 | -0.65409500 |
| C   | -4.74929300 | -1.50131500 | -0.67811400 |
| H   | -5.63729100 | -1.39640500 | -1.29437400 |
| C   | -4.56225600 | -2.66948500 | 0.06198000  |
| H   | -5.30748300 | -3.45847100 | 0.02918400  |
| C   | -3.40474900 | -2.83210000 | 0.83211600  |
| H   | -3.25566600 | -3.75220500 | 1.38611000  |
| C   | -2.42936400 | -1.82870300 | 0.89244200  |
| C   | 4.57884800  | -0.20048200 | -0.36831600 |
| C   | 1.16608800  | 4.48094100  | 0.91822300  |
| H   | 1.98398800  | 5.19105700  | 0.95676500  |
| C   | 1.36502700  | 3.21704400  | 0.33834300  |
| H   | 2.32584300  | 2.92573800  | -0.07100200 |
| C   | -1.18973300 | -1.98788300 | 1.76639700  |
| H   | -0.37288400 | -1.40533800 | 1.32463600  |
| C   | -4.02768600 | 0.75987100  | -1.54365800 |
| H   | -3.15646900 | 1.41900800  | -1.47683000 |
| C   | -5.26267800 | 1.56763700  | -1.09204600 |
| H   | -5.39824200 | 2.45094200  | -1.72723300 |
| H   | -6.17407700 | 0.96289300  | -1.16107800 |
| H   | -5.17016700 | 1.90249300  | -0.05158300 |
| C   | -4.15686200 | 0.35280800  | -3.02674300 |
| H   | -5.03974900 | -0.27355500 | -3.19605700 |

|   |             |             |             |
|---|-------------|-------------|-------------|
| H | -4.25427300 | 1.24361100  | -3.65850300 |
| H | -3.27802300 | -0.20955800 | -3.36022700 |
| C | -0.68760000 | -3.43794700 | 1.86490500  |
| H | -1.36399300 | -4.06910600 | 2.45432000  |
| H | -0.56840400 | -3.88948100 | 0.87404000  |
| H | 0.29169800  | -3.44930500 | 2.35381900  |
| C | -1.44835800 | -1.41027800 | 3.17652800  |
| H | -1.74826900 | -0.35599200 | 3.13608700  |
| H | -2.24615100 | -1.96808500 | 3.68221200  |
| H | -0.54020300 | -1.48110800 | 3.78519500  |

[Ag-2]

|     |             |             |             |
|-----|-------------|-------------|-------------|
| 0 1 |             |             |             |
| Ag  | 1.53454400  | 0.26201100  | -0.19219500 |
| Ag  | -1.53329600 | 0.26012200  | -0.19265600 |
| S   | -0.00082000 | 2.95609000  | -1.75601600 |
| S   | 0.00084500  | -2.82179400 | -0.65839200 |
| F   | 1.10924000  | 5.40596600  | -1.19904200 |
| F   | -0.02007500 | 4.49830500  | 0.50471500  |
| F   | -1.12782800 | 5.40180500  | -1.21533800 |
| F   | -0.00488300 | -3.65331100 | -3.27127800 |
| F   | -1.11408600 | -5.00712600 | -1.87833100 |
| F   | 1.12368900  | -4.99878300 | -1.88582100 |
| O   | 1.34165900  | 2.28129600  | -1.11431800 |
| O   | -1.34607800 | 2.27352500  | -1.12864500 |
| O   | 0.00676300  | 3.24712600  | -3.32962600 |
| O   | 1.35465100  | -1.98080600 | -0.99187500 |
| O   | -1.35756600 | -1.98607600 | -0.98652400 |
| O   | 0.00508800  | -3.58744500 | 0.76129900  |
| N   | 3.62862800  | -0.15653600 | 0.76366700  |
| N   | 1.17239500  | -0.78927000 | 2.01344400  |
| N   | -1.16921000 | -0.78991100 | 2.01369400  |
| N   | -3.62636200 | -0.15694100 | 0.76574400  |
| C   | 3.60164000  | -0.77491200 | 1.88370700  |
| H   | 4.52051200  | -1.03706900 | 2.41704600  |
| C   | 2.33164700  | -1.19974000 | 2.52516800  |
| C   | 2.41221400  | -2.05481600 | 3.66170800  |
| H   | 3.38577900  | -2.35674400 | 4.03141700  |
| C   | 1.25065300  | -2.49382200 | 4.25294500  |
| H   | 1.27295200  | -3.15918700 | 5.11058500  |
| C   | 0.00217200  | -2.07828800 | 3.71870200  |
| C   | 0.00177300  | -1.21228700 | 2.58289600  |
| C   | -1.24592500 | -2.49441300 | 4.25334400  |
| H   | -1.26763400 | -3.15974400 | 5.11102600  |
| C   | -2.40787800 | -2.05600100 | 3.66242900  |



|   |             |             |             |
|---|-------------|-------------|-------------|
| H | -3.38117800 | -2.35835500 | 4.03248300  |
| C | -2.32810400 | -1.20092800 | 2.52582500  |
| C | -3.59862000 | -0.77679900 | 1.88490000  |
| H | -4.51712100 | -1.04068900 | 2.41802000  |
| C | 4.87394800  | 0.22809000  | 0.14206500  |
| C | 5.42986200  | -0.64610900 | -0.81855400 |
| C | 6.62871000  | -0.25638700 | -1.43293100 |
| H | 7.08444500  | -0.90664900 | -2.17223400 |
| C | 7.23464400  | 0.96588400  | -1.12204400 |
| H | 8.16044200  | 1.25228800  | -1.61202000 |
| C | 6.63706000  | 1.82858500  | -0.19984400 |
| H | 7.09816000  | 2.78844900  | 0.01164300  |
| C | 5.44080800  | 1.48246300  | 0.44943500  |
| C | 4.75608700  | 2.48408600  | 1.37574000  |
| H | 3.94352200  | 1.97752700  | 1.90742800  |
| C | 5.71485500  | 3.05461300  | 2.43867900  |
| H | 6.18208200  | 2.25854400  | 3.03077800  |
| H | 5.16929400  | 3.71702600  | 3.12095600  |
| H | 6.51653300  | 3.64564400  | 1.98166100  |
| C | 4.11299500  | 3.61628400  | 0.54320600  |
| H | 4.87680800  | 4.16495300  | -0.02119500 |
| H | 3.59990800  | 4.32924500  | 1.20025100  |
| H | 3.37971800  | 3.22278600  | -0.16889800 |
| C | 4.75368400  | -1.97092200 | -1.16128800 |
| H | 3.68659100  | -1.88905500 | -0.92601200 |
| C | 5.33620000  | -3.11966500 | -0.30764700 |
| H | 6.40660900  | -3.24951900 | -0.50992400 |
| H | 4.82575800  | -4.06163000 | -0.53868100 |
| H | 5.22156000  | -2.92807100 | 0.76646400  |
| C | 4.84810400  | -2.32097600 | -2.65724900 |
| H | 4.47975100  | -1.49966500 | -3.28119000 |
| H | 4.23485300  | -3.20439900 | -2.86677700 |
| H | 5.87573800  | -2.55167200 | -2.96341000 |
| C | -4.87212200 | 0.22648600  | 0.14426200  |
| C | -5.43614500 | 1.48325900  | 0.44678300  |
| C | -6.63336000 | 1.82829500  | -0.20122600 |
| H | -7.09241400 | 2.78989100  | 0.00691800  |
| C | -7.23447100 | 0.96219200  | -1.11795400 |
| H | -8.16100800 | 1.24767200  | -1.60706600 |
| C | -6.63102400 | -0.26235400 | -1.42465700 |
| H | -7.08937600 | -0.91523200 | -2.16004700 |
| C | -5.43133900 | -0.65115700 | -0.81125500 |
| C | -4.75763200 | -1.97812000 | -1.15074300 |
| H | -3.69049000 | -1.89803300 | -0.91514300 |
| C | -4.85176800 | -2.33052300 | -2.64622400 |
| H | -5.87976300 | -2.55893000 | -2.95285200 |

|   |             |             |             |
|---|-------------|-------------|-------------|
| H | -4.24069900 | -3.21591900 | -2.85380700 |
| H | -4.48069900 | -1.51122000 | -3.27117900 |
| C | -5.34323900 | -3.12405500 | -0.29548300 |
| H | -5.22876200 | -2.93087100 | 0.77837000  |
| H | -4.83493400 | -4.06763500 | -0.52466300 |
| H | -6.41384800 | -3.25177200 | -0.49804400 |
| C | -4.74807200 | 2.48766400  | 1.36753500  |
| H | -3.93161900 | 1.98335100  | 1.89538200  |
| C | -5.70235400 | 3.05779300  | 2.43477100  |
| H | -6.50871100 | 3.64488200  | 1.98087600  |
| H | -5.15502000 | 3.72369200  | 3.11222200  |
| H | -6.16348800 | 2.26166000  | 3.03155600  |
| C | -4.11171700 | 3.61980000  | 0.52984800  |
| H | -3.38248100 | 3.22603900  | -0.18621600 |
| H | -3.59533800 | 4.33403800  | 1.18290700  |
| H | -4.87958100 | 4.16703000  | -0.03042500 |
| C | -0.01048400 | 4.68925400  | -0.85864000 |
| C | 0.00140900  | -4.21675400 | -2.02190600 |

[Ag-2-A]

|     |             |             |             |
|-----|-------------|-------------|-------------|
| 2 1 |             |             |             |
| Ag  | 1.53349000  | 0.00015300  | -0.00018500 |
| Ag  | -1.53319300 | 0.00007800  | 0.00015600  |
| N   | 1.02912800  | -2.19759700 | 0.55199900  |
| N   | 1.02892100  | 2.19786300  | -0.55217800 |
| N   | -1.02924800 | 2.19738600  | 0.55354200  |
| N   | -1.02924100 | -2.19721700 | -0.55337200 |
| N   | 3.17592700  | -0.78458200 | 1.65867900  |
| N   | -3.17583600 | -0.78335300 | -1.65923000 |
| N   | 3.17544000  | 0.78485600  | -1.65894500 |
| N   | -3.17558300 | 0.78339600  | 1.65947100  |
| C   | -0.00020700 | 2.90950300  | 0.00090600  |
| C   | 4.24452600  | -0.00919400 | 2.21315800  |
| C   | -1.05346000 | 5.00756700  | 0.68346200  |
| H   | -1.07019200 | 6.09258000  | 0.71422800  |
| C   | -0.00030500 | 4.33666400  | 0.00134800  |
| C   | 2.00806600  | -2.84567400 | 1.19113700  |
| C   | -2.00814600 | 2.84496300  | 1.19322700  |
| C   | -2.00821800 | -2.84484200 | -1.19290000 |
| C   | -0.00007300 | -2.90928500 | -0.00090000 |
| C   | 3.10442500  | 2.05977500  | -1.80208900 |
| H   | 3.82578400  | 2.62514900  | -2.39431600 |
| C   | 2.00772400  | 2.84597600  | -1.19146300 |
| C   | -4.88867100 | 1.96069800  | -3.46738300 |
| H   | -4.62020300 | 2.84357700  | -4.03944800 |

|   |             |             |             |
|---|-------------|-------------|-------------|
| C | -3.10473400 | 2.05823700  | 1.80338500  |
| H | -3.82623900 | 2.62318100  | 2.39584700  |
| C | 2.03751200  | -4.26580400 | 1.29596900  |
| H | 2.84687400  | -4.74257200 | 1.83709700  |
| C | 4.24386100  | 0.00925700  | -2.21348200 |
| C | -2.03772500 | 4.26502700  | 1.29893700  |
| H | -2.84706100 | 4.74138000  | 1.84046800  |
| C | -3.87621400 | 1.15906900  | -2.92725100 |
| C | -3.10492700 | -2.05820900 | -1.80298200 |
| H | -3.82649300 | -2.62325300 | -2.39527500 |
| C | 1.05275500  | 5.00813400  | -0.68035700 |
| H | 1.06933400  | 6.09316800  | -0.71045600 |
| C | 3.10484800  | -2.05950800 | 1.80169500  |
| H | 3.82633000  | -2.62496300 | 2.39369900  |
| C | -0.00011600 | -4.33644700 | -0.00133200 |
| C | 2.03711300  | 4.26610800  | -1.29630300 |
| H | 2.84637800  | 4.74290300  | -1.83755200 |
| C | -4.24393200 | 0.00733800  | 2.21348000  |
| C | -4.24434200 | -0.00747300 | -2.21318400 |
| C | 3.87556300  | -1.15688800 | -2.92809900 |
| C | -5.60261500 | 0.35664700  | 2.01248700  |
| C | 5.60252300  | 0.35843500  | -2.01210000 |
| C | -6.23787800 | 1.62893100  | -3.28836900 |
| H | -7.01402500 | 2.25760400  | -3.71260400 |
| C | -2.03775300 | -4.26490800 | -1.29857700 |
| H | -2.84715200 | -4.74130400 | -1.83997700 |
| C | -1.05336300 | -5.00740000 | -0.68325100 |
| H | -1.07005600 | -6.09241400 | -0.71400500 |
| C | 3.87656400  | 1.15701100  | 2.92785400  |
| C | -4.88783000 | -1.96112300 | 3.46744400  |
| H | -4.61916600 | -2.84406600 | 4.03931900  |
| C | -5.60294800 | -0.35693400 | -2.01195900 |
| C | 5.60307100  | -0.35876900 | 2.01176300  |
| C | -6.58315300 | 0.48805100  | -2.55869700 |
| H | -7.63031100 | 0.24099000  | -2.41104400 |
| C | 1.05308500  | -5.00787100 | 0.68018900  |
| H | 1.06971000  | -6.09290500 | 0.71029700  |
| C | 4.88914200  | 1.95817100  | 3.46845800  |
| H | 4.62080700  | 2.84078800  | 4.04099100  |
| C | -6.58263200 | -0.48855500 | 2.55922700  |
| H | -7.62984300 | -0.24161800 | 2.41174300  |
| C | -3.87555600 | -1.15927900 | 2.92729200  |
| C | 4.88789500  | -1.95834400 | -3.46871800 |
| H | 4.61929500  | -2.84091400 | -4.04119700 |
| C | -6.23710600 | -1.62949800 | 3.28867900  |
| H | -7.01311000 | -2.25834500 | 3.71291600  |

|   |             |             |             |
|---|-------------|-------------|-------------|
| C | 6.58340400  | 0.48574000  | 2.55900800  |
| H | 7.63052400  | 0.23858500  | 2.41124600  |
| C | 6.23829900  | 1.62626900  | 3.28931000  |
| H | 7.01453800  | 2.25457500  | 3.71391900  |
| C | 6.58259700  | -0.48637800 | -2.55934000 |
| H | 7.62979300  | -0.23955100 | -2.41156400 |
| C | 6.23714900  | -1.62681300 | -3.28962400 |
| H | 7.01319900  | -2.25536200 | -3.71422000 |
| C | 6.05311000  | -1.56119100 | 1.20477000  |
| H | 7.04967900  | -1.38147100 | 0.79330500  |
| H | 6.12713200  | -2.46450700 | 1.82210500  |
| H | 5.38897900  | -1.77947500 | 0.36212600  |
| C | 2.42486900  | 1.50578700  | 3.15957100  |
| H | 1.86774300  | 1.56511800  | 2.21602400  |
| H | 1.92308600  | 0.75138200  | 3.77663400  |
| H | 2.33841700  | 2.46736200  | 3.67321600  |
| C | -6.05314900 | 1.55947000  | 1.20636800  |
| H | -7.04970000 | 1.37968800  | 0.79488000  |
| H | -6.12743700 | 2.46232300  | 1.82434800  |
| H | -5.38918400 | 1.77858900  | 0.36381200  |
| C | -2.42372900 | -1.50777900 | 3.15858900  |
| H | -1.86670200 | -1.56624500 | 2.21493100  |
| H | -1.92210900 | -0.75366300 | 3.77613800  |
| H | -2.33691700 | -2.46969800 | 3.67152800  |
| C | -6.05319400 | -1.55973200 | -1.20564400 |
| H | -7.04973000 | -1.38006900 | -0.79406900 |
| H | -6.12739300 | -2.46267700 | -1.82350100 |
| H | -5.38909600 | -1.77863100 | -0.36313500 |
| C | -2.42447000 | 1.50770000  | -3.15887300 |
| H | -1.86725600 | 1.56633500  | -2.21533800 |
| H | -1.92289300 | 0.75357000  | -3.77643900 |
| H | -2.33786800 | 2.46957100  | -3.67194100 |
| C | 2.42375800  | -1.50530300 | -3.15967100 |
| H | 1.86673300  | -1.56454500 | -2.21605600 |
| H | 1.92208500  | -0.75074900 | -3.77663900 |
| H | 2.33701300  | -2.46683600 | -3.67334600 |
| C | 6.05298500  | 1.56062700  | -1.20499800 |
| H | 7.04947500  | 1.38049500  | -0.79351900 |
| H | 6.12738000  | 2.46395900  | -1.82226500 |
| H | 5.38892100  | 1.77910200  | -0.36235200 |

[Mo-1]

|     |              |             |             |
|-----|--------------|-------------|-------------|
| 0 1 |              |             |             |
| C   | -2.21972500  | -2.37452800 | -0.53984200 |
| C   | -2.98974800  | -2.88550600 | 0.52114200  |
| H   | -3.21957500  | -2.24977400 | 1.37045000  |
| C   | -3.42899400  | -4.21478400 | 0.49608000  |
| H   | -4.01415700  | -4.60087300 | 1.32605800  |
| C   | -3.10477700  | -5.05107000 | -0.58254900 |
| H   | -3.44385800  | -6.08264100 | -0.59699200 |
| C   | -2.33180200  | -4.54520200 | -1.63847600 |
| H   | -2.07396900  | -5.18294300 | -2.47926000 |
| C   | -1.89181900  | -3.21617600 | -1.61713900 |
| H   | -1.29868900  | -2.81286500 | -2.43274200 |
| C   | -2.49576600  | 0.05599500  | -0.37547400 |
| C   | -3.91837800  | 0.05015500  | -0.21662600 |
| C   | -5.12975900  | 0.03480100  | -0.08677900 |
| C   | -6.55555400  | 0.02204500  | 0.06385500  |
| C   | -7.24811100  | 1.21388900  | 0.36214400  |
| H   | -6.68983700  | 2.13741100  | 0.48011100  |
| C   | -8.63869100  | 1.19838500  | 0.50737200  |
| H   | -9.16764100  | 2.11787200  | 0.73846400  |
| C   | -9.35030500  | -0.00169800 | 0.35643400  |
| H   | -10.43030000 | -0.01090700 | 0.46959600  |
| C   | -8.66519100  | -1.19001600 | 0.05984800  |
| H   | -9.21492300  | -2.11885600 | -0.05724600 |
| C   | -7.27461700  | -1.18191000 | -0.08584900 |
| H   | -6.73712000  | -2.09652500 | -0.31611900 |
| C   | -2.14310100  | 2.48540700  | -0.18418200 |
| C   | -1.48016300  | 3.32844900  | 0.72496100  |
| H   | -0.66539000  | 2.92255900  | 1.31512600  |
| C   | -1.87184900  | 4.66442800  | 0.86270700  |
| H   | -1.34916600  | 5.30347100  | 1.56850400  |
| C   | -2.92835900  | 5.17826100  | 0.09563000  |
| H   | -3.22970000  | 6.21606600  | 0.20272000  |
| C   | -3.58409400  | 4.34152900  | -0.81964600 |
| H   | -4.39175500  | 4.73290300  | -1.43222400 |
| C   | -3.19408700  | 3.00465700  | -0.96502700 |
| H   | -3.68563500  | 2.37110400  | -1.69629000 |
| C   | 2.03767400   | -2.40051600 | 0.76392900  |
| C   | 3.10257800   | -2.65329200 | 1.65125700  |
| H   | 3.65281900   | -1.82558500 | 2.08629100  |
| C   | 3.43377500   | -3.96855100 | 1.99695800  |
| H   | 4.25399500   | -4.14952200 | 2.68616300  |
| C   | 2.70397000   | -5.04682000 | 1.47555400  |
| H   | 2.95907700   | -6.06592100 | 1.75038900  |

|    |             |             |             |
|----|-------------|-------------|-------------|
| C  | 1.63166400  | -4.79333300 | 0.60668400  |
| H  | 1.04822000  | -5.61672800 | 0.20489100  |
| C  | 1.30081600  | -3.48194700 | 0.25257200  |
| H  | 0.46936300  | -3.28309100 | -0.41294600 |
| C  | 2.48153400  | -0.01165500 | 0.29799800  |
| C  | 3.88753200  | -0.08641100 | 0.03883600  |
| C  | 5.08312700  | -0.13394700 | -0.19442700 |
| C  | 6.49184800  | -0.18953200 | -0.45372500 |
| C  | 7.15486700  | -1.43283000 | -0.51665800 |
| H  | 6.58604500  | -2.34615300 | -0.37261900 |
| C  | 8.52985300  | -1.48226000 | -0.76555000 |
| H  | 9.03548300  | -2.44179800 | -0.81421100 |
| C  | 9.25585400  | -0.29624800 | -0.95424400 |
| H  | 10.32350700 | -0.33752600 | -1.14844500 |
| C  | 8.60024600  | 0.94307800  | -0.89372400 |
| H  | 9.16038000  | 1.86128400  | -1.04165400 |
| C  | 7.22556500  | 0.99983200  | -0.64500500 |
| H  | 6.71073300  | 1.95447300  | -0.59905100 |
| C  | 2.29352500  | 2.45076500  | 0.36848600  |
| C  | 1.76540300  | 3.47621000  | -0.43495900 |
| H  | 0.97292800  | 3.23647700  | -1.13657700 |
| C  | 2.25802100  | 4.78129300  | -0.32964200 |
| H  | 1.83795400  | 5.56255500  | -0.95640700 |
| C  | 3.28668800  | 5.08191900  | 0.57577500  |
| H  | 3.66826900  | 6.09545800  | 0.65565400  |
| C  | 3.81182700  | 4.06172400  | 1.38345300  |
| H  | 4.59850000  | 4.28489800  | 2.09890700  |
| C  | 3.31839400  | 2.75579200  | 1.28623300  |
| H  | 3.70950000  | 1.97683700  | 1.93316400  |
| N  | -1.72493800 | -1.04379600 | -0.53807800 |
| N  | -1.69953800 | 1.14683200  | -0.31825300 |
| N  | 1.64607100  | -1.08300400 | 0.43196100  |
| N  | 1.74717900  | 1.14974400  | 0.28117000  |
| Mo | 0.13296000  | 0.05518200  | -0.40670500 |

**[Mo-2]**

0 1

|   |            |             |             |
|---|------------|-------------|-------------|
| C | 2.39457800 | -1.59405100 | -2.34187200 |
| C | 3.76311300 | -1.26146500 | -2.36201900 |
| H | 4.23512700 | -0.89854100 | -1.45482100 |
| C | 4.50346200 | -1.37192900 | -3.54351700 |
| H | 5.55671000 | -1.10602800 | -3.54213700 |
| C | 3.88726800 | -1.80477500 | -4.72843100 |
| H | 4.46081300 | -1.88485000 | -5.64718300 |
| C | 2.52291700 | -2.12730100 | -4.71329900 |

|   |            |             |             |
|---|------------|-------------|-------------|
| H | 2.03089100 | -2.46502100 | -5.62090100 |
| C | 1.78033600 | -2.02547000 | -3.52928000 |
| H | 0.73055000 | -2.29072400 | -3.52226300 |
| C | 2.01191100 | -2.00978800 | 0.00028700  |
| C | 3.03202700 | -3.02815900 | 0.00035600  |
| C | 3.89412500 | -3.88853700 | 0.00025400  |
| C | 4.90930800 | -4.90169800 | 0.00017400  |
| C | 5.54102400 | -5.27637400 | -1.20401900 |
| H | 5.24871600 | -4.78900000 | -2.12909600 |
| C | 6.53085700 | -6.26433900 | -1.20061800 |
| H | 7.01310700 | -6.54802500 | -2.13132200 |
| C | 6.90111700 | -6.88945900 | -0.00002000 |
| H | 7.66987300 | -7.65664900 | -0.00009400 |
| C | 6.27536100 | -6.52059100 | 1.20067400  |
| H | 6.56012200 | -7.00235200 | 2.13130400  |
| C | 5.28538300 | -5.53277000 | 1.20426600  |
| H | 4.79751700 | -5.24154000 | 2.12942300  |
| C | 1.59583000 | -2.39266200 | 2.34252200  |
| C | 1.26700200 | -3.76212100 | 2.36236200  |
| H | 0.90679000 | -4.23531000 | 1.45470200  |
| C | 1.37760600 | -4.50197500 | 3.54416300  |
| H | 1.11462900 | -5.55595800 | 3.54250200  |
| C | 1.80677800 | -3.88441900 | 4.72970000  |
| H | 1.88695900 | -4.45760900 | 5.64866200  |
| C | 2.12547000 | -2.51915900 | 4.71488700  |
| H | 2.46027700 | -2.02604400 | 5.62297500  |
| C | 2.02351600 | -1.77705500 | 3.53060000  |
| H | 2.28582600 | -0.72652500 | 3.52388600  |
| C | 2.39323400 | 1.59596300  | 2.34182300  |
| C | 3.76201900 | 1.26442400  | 2.36200200  |
| H | 4.23432500 | 0.90184400  | 1.45481800  |
| C | 4.50223900 | 1.37543800  | 3.54352800  |
| H | 5.55568900 | 1.11033900  | 3.54218500  |
| C | 3.88566800 | 1.80779100  | 4.72842700  |
| H | 4.45911900 | 1.88828600  | 5.64720100  |
| C | 2.52107000 | 2.12927400  | 4.71325500  |
| H | 2.02875500 | 2.46659200  | 5.62084900  |
| C | 1.77861000 | 2.02690200  | 3.52920700  |
| H | 0.72863100 | 2.29138500  | 3.52211400  |
| C | 2.01024300 | 2.01141800  | -0.00035200 |
| C | 3.02959500 | 3.03055200  | -0.00044300 |
| C | 3.89103100 | 3.89159400  | -0.00040300 |
| C | 4.90545900 | 4.90551200  | -0.00019600 |
| C | 5.28112000 | 5.53693300  | -1.20423500 |
| H | 4.79354500 | 5.24535900  | -2.12943700 |
| C | 6.27031300 | 6.52553900  | -1.20052900 |

|   |             |            |             |
|---|-------------|------------|-------------|
| H | 6.55475400  | 7.00756900 | -2.13111700 |
| C | 6.89569300  | 6.89484700 | 0.00022600  |
| H | 7.66383800  | 7.66265000 | 0.00038900  |
| C | 6.52585300  | 6.26937300 | 1.20076800  |
| H | 7.00781700  | 6.55339700 | 2.13151800  |
| C | 5.53680300  | 5.28062200 | 1.20405600  |
| H | 5.24482200  | 4.79297300 | 2.12909000  |
| C | 1.59383900  | 2.39394300 | -2.34258600 |
| C | 2.02174200  | 1.77861700 | -3.53073600 |
| H | 2.28464000  | 0.72823100 | -3.52411200 |
| C | 2.12312500  | 2.52079500 | -4.71502400 |
| H | 2.45813100  | 2.02788800 | -5.62315100 |
| C | 1.80361700  | 3.88586200 | -4.72978900 |
| H | 1.88335500  | 4.45911300 | -5.64875200 |
| C | 1.37420300  | 4.50314100 | -3.54419500 |
| H | 1.11059200  | 5.55696600 | -3.54248800 |
| C | 1.26418100  | 3.76320700 | -2.36238900 |
| H | 0.90381100  | 4.23619200 | -1.45468600 |
| C | -1.59584200 | 2.39266100 | 2.34247800  |
| C | -1.26703100 | 3.76212400 | 2.36229100  |
| H | -0.90681700 | 4.23529800 | 1.45462300  |
| C | -1.37765300 | 4.50200200 | 3.54407600  |
| H | -1.11468800 | 5.55598800 | 3.54239400  |
| C | -1.80682900 | 3.88446600 | 4.72962200  |
| H | -1.88702500 | 4.45767500 | 5.64857100  |
| C | -2.12550800 | 2.51920300 | 4.71483500  |
| H | -2.46031900 | 2.02610400 | 5.62293000  |
| C | -2.02353700 | 1.77707500 | 3.53056400  |
| H | -2.28583700 | 0.72654200 | 3.52386800  |
| C | -2.01191600 | 2.00974000 | 0.00025300  |
| C | -3.03203000 | 3.02811200 | 0.00030400  |
| C | -3.89412100 | 3.88849700 | 0.00019200  |
| C | -4.90921300 | 4.90175000 | 0.00018200  |
| C | -5.28517600 | 5.53282800 | 1.20430700  |
| H | -4.79729100 | 5.24153600 | 2.12943400  |
| C | -6.27507000 | 6.52073400 | 1.20078300  |
| H | -6.55974500 | 7.00249900 | 2.13143800  |
| C | -6.90085200 | 6.88968100 | 0.00012700  |
| H | -7.66954300 | 7.65693600 | 0.00010700  |
| C | -6.53070400 | 6.26455400 | -1.20050100 |
| H | -7.01297600 | 6.54830100 | -2.13117600 |
| C | -5.54095500 | 5.27650400 | -1.20397200 |
| H | -5.24873500 | 4.78912400 | -2.12907300 |
| C | -2.39456600 | 1.59398100 | -2.34190700 |
| C | -3.76310300 | 1.26140800 | -2.36207500 |
| H | -4.23513600 | 0.89849400 | -1.45488300 |



|   |             |             |             |
|---|-------------|-------------|-------------|
| C | -4.50343000 | 1.37187100  | -3.54358700 |
| H | -5.55668100 | 1.10598000  | -3.54222400 |
| C | -3.88721100 | 1.80470400  | -4.72849400 |
| H | -4.46074000 | 1.88477800  | -5.64725600 |
| C | -2.52285700 | 2.12721700  | -4.71334000 |
| H | -2.03081300 | 2.46492600  | -5.62093500 |
| C | -1.78029800 | 2.02538600  | -3.52930800 |
| H | -0.73050900 | 2.29063000  | -3.52227300 |
| C | -2.39314100 | -1.59600500 | 2.34192500  |
| C | -3.76192900 | -1.26448200 | 2.36218200  |
| H | -4.23429000 | -0.90189900 | 1.45502800  |
| C | -4.50208100 | -1.37551500 | 3.54374900  |
| H | -5.55553500 | -1.11042800 | 3.54246800  |
| C | -3.88543900 | -1.80787200 | 4.72861000  |
| H | -4.45883700 | -1.88838200 | 5.64741600  |
| C | -2.52083700 | -2.12933900 | 4.71335900  |
| H | -2.02846800 | -2.46665900 | 5.62092200  |
| C | -1.77844600 | -2.02694700 | 3.52927000  |
| H | -0.72846300 | -2.29141700 | 3.52211400  |
| C | -2.01024600 | -2.01145700 | -0.00027000 |
| C | -3.02958800 | -3.03060300 | -0.00031900 |
| C | -3.89102100 | -3.89164700 | -0.00025500 |
| C | -4.90556800 | -4.90544600 | -0.00009900 |
| C | -5.53698100 | -5.28051800 | 1.20412900  |
| H | -5.24496700 | -4.79292600 | 2.12918300  |
| C | -6.52614000 | -6.26916000 | 1.20079300  |
| H | -7.00815600 | -6.55315500 | 2.13152400  |
| C | -6.89602100 | -6.89456300 | 0.00022600  |
| H | -7.66425000 | -7.66228000 | 0.00035300  |
| C | -6.27057200 | -6.52529300 | -1.20050400 |
| H | -6.55504300 | -7.00727000 | -2.13111100 |
| C | -5.28127000 | -5.53679600 | -1.20416200 |
| H | -4.79364000 | -5.24525400 | -2.12934500 |
| C | -1.59391300 | -2.39402100 | -2.34250800 |
| C | -2.02184300 | -1.77870600 | -3.53065400 |
| H | -2.28472000 | -0.72831500 | -3.52403700 |
| C | -2.12327600 | -2.52090100 | -4.71492600 |
| H | -2.45830100 | -2.02800200 | -5.62305100 |
| C | -1.80379500 | -3.88597500 | -4.72967900 |
| H | -1.88357300 | -4.45923900 | -5.64863000 |
| C | -1.37435700 | -4.50324300 | -3.54408800 |
| H | -1.11076800 | -5.55707300 | -3.54237300 |
| C | -1.26428400 | -3.76329200 | -2.36229700 |
| H | -0.90389700 | -4.23627000 | -1.45459800 |
| N | 1.42164000  | -1.61854900 | 1.15060500  |
| N | 1.61997900  | -1.42022900 | -1.15015000 |

|    |             |             |             |
|----|-------------|-------------|-------------|
| N  | 1.61879400  | 1.42155200  | 1.15008500  |
| N  | 1.42026000  | 1.61970400  | -1.15066500 |
| N  | -1.42163800 | 1.61852700  | 1.15057600  |
| N  | -1.61998500 | 1.42016000  | -1.15017400 |
| N  | -1.61876600 | -1.42157600 | 1.15014900  |
| N  | -1.42028900 | -1.61976700 | -1.15060400 |
| Mo | 0.00000800  | -0.00000800 | 1.05170500  |
| Mo | -0.00000600 | -0.00003500 | -1.05183800 |

**[Ru-1]**

0 2

|    |             |             |             |
|----|-------------|-------------|-------------|
| Cl | -0.78014700 | 3.26380700  | 0.20652500  |
| F  | -4.99119800 | -2.42384200 | 0.73183600  |
| F  | -2.90292200 | -2.38652000 | 1.55002700  |
| F  | -4.34894800 | -0.79280300 | 2.11045900  |
| N  | -1.80872600 | 0.59109900  | -1.21708700 |
| N  | -1.17440900 | -0.13455100 | 0.73388800  |
| H  | -1.11538500 | -0.65225700 | 1.59957500  |
| C  | -2.20815700 | -0.17792400 | -0.14481900 |
| C  | -3.47912100 | -0.78767300 | -0.13946100 |
| C  | -4.31203600 | -0.57772000 | -1.24480600 |
| H  | -5.29258200 | -1.04228000 | -1.26514000 |
| C  | -3.89038700 | 0.22303400  | -2.31465500 |
| H  | -4.53129700 | 0.39849800  | -3.16855100 |
| C  | -2.61608300 | 0.80642100  | -2.25933700 |
| H  | -2.24249500 | 1.44697800  | -3.04944700 |
| C  | -3.92771400 | -1.58179100 | 1.03159800  |
| F  | 4.41245500  | -1.22883600 | -1.91296100 |
| F  | 3.29799900  | -2.69514300 | -0.66940800 |
| F  | 5.38240300  | -2.10188400 | -0.09976500 |
| N  | 1.84452800  | 1.02927800  | 0.76803800  |
| N  | 1.34321200  | -0.34543700 | -0.86697300 |
| H  | 1.40725700  | -1.14427300 | -1.48526600 |
| C  | 2.33105600  | -0.01793100 | 0.00755600  |
| C  | 3.63672100  | -0.50272400 | 0.24791700  |
| C  | 4.39476900  | 0.10477900  | 1.25574600  |
| H  | 5.39688600  | -0.26076400 | 1.45552900  |
| C  | 3.87451300  | 1.17139600  | 2.00244200  |
| H  | 4.45655000  | 1.64753800  | 2.78026400  |
| C  | 2.57460100  | 1.61643600  | 1.72075500  |
| H  | 2.11115000  | 2.43926000  | 2.25300700  |
| C  | 4.17867600  | -1.60663400 | -0.58174400 |
| Ru | 0.01479700  | 1.05325200  | -0.25988200 |

**[Ru-1-octahedral]**

0 2

|    |             |             |             |
|----|-------------|-------------|-------------|
| Cl | -0.07311200 | -2.87736800 | 0.75444900  |
| F  | -6.28658200 | -0.79035900 | -0.31910300 |
| F  | -4.96745400 | 0.41440100  | -1.65801600 |
| F  | -4.66882600 | -1.78230800 | -1.50947100 |
| N  | -1.74953900 | -0.24073300 | 1.19603600  |
| N  | -1.86237300 | -0.80499300 | -0.91234000 |
| H  | -2.25146700 | -1.11987800 | -1.79119900 |
| C  | -2.61973000 | -0.51013800 | 0.14933800  |
| C  | -4.02362300 | -0.44737900 | 0.38470900  |
| C  | -4.47209200 | -0.16956100 | 1.67421200  |
| H  | -5.53957200 | -0.13640200 | 1.86776000  |
| C  | -3.56051500 | 0.05453300  | 2.72149800  |
| H  | -3.90150100 | 0.24841900  | 3.72995600  |
| C  | -2.19244400 | 0.00865000  | 2.43301400  |
| H  | -1.44330300 | 0.15757300  | 3.20353500  |
| C  | -4.96764100 | -0.65116800 | -0.73823000 |
| F  | 4.62405900  | -0.92918600 | 1.91401500  |
| F  | 4.87190300  | 1.01856700  | 0.87604700  |
| F  | 6.20633700  | -0.69388000 | 0.34641400  |
| N  | 1.64256000  | -1.00055700 | -1.14528900 |
| N  | 1.80485000  | -0.29043900 | 0.92075400  |
| H  | 2.22172900  | -0.21092000 | 1.84029900  |
| C  | 2.53485400  | -0.68107300 | -0.14061900 |
| C  | 3.92854100  | -0.80101600 | -0.38775600 |
| C  | 4.34725500  | -1.27073700 | -1.63390500 |
| H  | 5.40923900  | -1.37574300 | -1.83214100 |
| C  | 3.41006600  | -1.60568400 | -2.62409400 |
| H  | 3.72404100  | -1.97877800 | -3.59002000 |
| C  | 2.04800300  | -1.44811500 | -2.33643600 |
| H  | 1.27719400  | -1.69009800 | -3.05934200 |
| C  | 4.88999300  | -0.37601900 | 0.65295600  |
| Ru | -0.04377600 | -0.61532200 | 0.02883200  |
| O  | 0.02344300  | 1.38834100  | -0.65497900 |
| C  | 0.32368700  | 2.50814700  | -0.20202100 |
| O  | 0.37866800  | 3.51838100  | -1.09373200 |
| C  | 0.65820800  | 4.91892800  | -0.72743600 |
| H  | 1.34480300  | 4.95507200  | 0.12395200  |
| H  | 1.16871800  | 5.31397700  | -1.60660500 |
| C  | 0.63784500  | 2.76365500  | 1.25026700  |
| H  | 1.71516600  | 2.91275000  | 1.38017400  |
| H  | 0.11273300  | 3.64483400  | 1.62752400  |
| H  | 0.34806400  | 1.88694300  | 1.82590400  |
| C  | -0.64137500 | 5.66692800  | -0.45890200 |

|   |             |            |             |
|---|-------------|------------|-------------|
| H | -0.42988600 | 6.73054000 | -0.30180300 |
| H | -1.31559100 | 5.57191200 | -1.31444900 |
| H | -1.15782800 | 5.28766300 | 0.42926800  |

**[Ru-2]**

|     |             |             |             |
|-----|-------------|-------------|-------------|
| 0 1 |             |             |             |
| Ru  | 0.00006200  | 0.12394500  | -1.20375400 |
| Cl  | -0.00014900 | 1.20204400  | -3.37748800 |
| F   | 4.63174500  | 4.35891200  | -0.29259500 |
| F   | 4.22995500  | 2.50864100  | -1.47749500 |
| F   | 2.70690500  | 4.12996300  | -1.40256000 |
| F   | -2.70692300 | 4.13046900  | -1.40209800 |
| F   | -4.22936800 | 2.50862600  | -1.47807400 |
| F   | -4.63222200 | 4.35838900  | -0.29273900 |
| N   | 1.45020500  | 1.26721800  | 1.57245000  |
| N   | 1.46563900  | 1.45490300  | -0.75016900 |
| H   | 1.81269200  | 1.93474600  | -1.57970400 |
| N   | -1.45042200 | 1.26707700  | 1.57246000  |
| N   | -1.46568700 | 1.45478600  | -0.75015100 |
| H   | -1.81283300 | 1.93449300  | -1.57972900 |
| C   | 1.97463300  | 1.84043000  | 0.42730100  |
| C   | 3.02983400  | 2.81128700  | 0.58972100  |
| C   | 3.48732500  | 3.14225700  | 1.84979000  |
| H   | 4.28248800  | 3.87180700  | 1.95714500  |
| C   | 2.92644800  | 2.52627900  | 2.99063300  |
| H   | 3.27754600  | 2.75998700  | 3.98693000  |
| C   | 1.92063100  | 1.59728700  | 2.80426000  |
| H   | 1.46613900  | 1.06607700  | 3.63242300  |
| C   | 3.63992900  | 3.44370200  | -0.61359100 |
| C   | -1.97480400 | 1.84027100  | 0.42728100  |
| C   | -3.03006200 | 2.81106800  | 0.58965700  |
| C   | -3.48764100 | 3.14199200  | 1.84970500  |
| H   | -4.28284000 | 3.87150800  | 1.95702300  |
| C   | -2.92683000 | 2.52600200  | 2.99057600  |
| H   | -3.27801700 | 2.75966400  | 3.98685300  |
| C   | -1.92094000 | 1.59707600  | 2.80424900  |
| H   | -1.46646200 | 1.06587100  | 3.63242600  |
| C   | -3.63997200 | 3.44363900  | -0.61366800 |
| Ru  | -0.00006200 | -0.12394500 | 1.20375400  |
| Cl  | 0.00015000  | -1.20204400 | 3.37748800  |
| F   | -4.63174600 | -4.35891100 | 0.29259600  |
| F   | -4.22995400 | -2.50864100 | 1.47749600  |
| F   | -2.70690500 | -4.12996400 | 1.40255900  |
| F   | 2.70692300  | -4.13046700 | 1.40210000  |
| F   | 4.22937000  | -2.50862500 | 1.47807300  |

|   |             |             |             |
|---|-------------|-------------|-------------|
| F | 4.63222100  | -4.35839000 | 0.29274000  |
| N | -1.45020500 | -1.26721800 | -1.57245000 |
| N | -1.46563800 | -1.45490400 | 0.75016900  |
| H | -1.81269000 | -1.93474700 | 1.57970300  |
| N | 1.45042200  | -1.26707700 | -1.57246100 |
| N | 1.46568800  | -1.45478600 | 0.75015000  |
| H | 1.81283300  | -1.93449300 | 1.57972900  |
| C | -1.97463300 | -1.84043000 | -0.42730100 |
| C | -3.02983400 | -2.81128700 | -0.58972100 |
| C | -3.48732600 | -3.14225600 | -1.84978900 |
| H | -4.28248900 | -3.87180600 | -1.95714400 |
| C | -2.92644900 | -2.52627900 | -2.99063300 |
| H | -3.27754800 | -2.75998700 | -3.98693000 |
| C | -1.92063100 | -1.59728700 | -2.80426000 |
| H | -1.46613900 | -1.06607700 | -3.63242300 |
| C | -3.63992900 | -3.44370100 | 0.61359100  |
| C | 1.97480400  | -1.84027100 | -0.42728100 |
| C | 3.03006100  | -2.81106900 | -0.58965700 |
| C | 3.48764100  | -3.14199300 | -1.84970500 |
| H | 4.28284000  | -3.87150900 | -1.95702200 |
| C | 2.92683000  | -2.52600300 | -2.99057600 |
| H | 3.27801700  | -2.75966600 | -3.98685200 |
| C | 1.92093900  | -1.59707700 | -2.80425000 |
| H | 1.46646200  | -1.06587300 | -3.63242700 |
| C | 3.63997300  | -3.44363800 | 0.61366900  |

**[Rh-2-A]**

|     |             |             |             |
|-----|-------------|-------------|-------------|
| 2 1 |             |             |             |
| Rh  | -1.08785300 | -0.46186500 | 0.09698000  |
| Rh  | 1.08778900  | 0.46195500  | 0.09689100  |
| N   | -0.02870700 | -1.55912000 | -1.37560500 |
| N   | 1.20449800  | -1.10954000 | -1.28751900 |
| N   | -1.20483500 | 1.11007100  | -1.28688900 |
| N   | 0.02835600  | 1.55966700  | -1.37507100 |
| N   | -1.61252700 | 0.84479700  | 1.54870500  |
| N   | 0.44110500  | 1.76856300  | 1.52672400  |
| N   | -0.44081900 | -1.76902000 | 1.52618000  |
| N   | 1.61281700  | -0.84523500 | 1.54802300  |
| C   | -0.36769500 | -2.57695300 | -2.24256600 |
| C   | -1.73066800 | -2.96129500 | -2.34057900 |
| H   | -2.47603600 | -2.43847300 | -1.75036200 |
| C   | -2.09099600 | -3.97550900 | -3.20236600 |
| H   | -3.12903700 | -4.27639000 | -3.29136000 |
| C   | -1.09942100 | -4.63315900 | -3.98397600 |
| H   | -1.39543200 | -5.43365000 | -4.65356500 |

|   |             |             |             |
|---|-------------|-------------|-------------|
| C | 0.23031600  | -4.25912900 | -3.90422600 |
| H | 0.96254800  | -4.77092600 | -4.51646000 |
| C | 0.63413700  | -3.21401400 | -3.03373600 |
| C | 1.99203900  | -2.75342000 | -2.89840600 |
| C | 2.24097300  | -1.66991700 | -2.00278700 |
| C | 3.55245000  | -1.16190100 | -1.81126000 |
| H | 3.72054700  | -0.36550200 | -1.09442400 |
| C | 4.60261400  | -1.72040700 | -2.50896200 |
| H | 5.61216900  | -1.35243300 | -2.36377000 |
| C | 4.36899700  | -2.79563000 | -3.41191300 |
| H | 5.20540600  | -3.22636200 | -3.95212600 |
| C | 3.09463700  | -3.30209900 | -3.60091800 |
| H | 2.94808000  | -4.12597200 | -4.28843500 |
| C | -2.24141500 | 1.67059200  | -2.00189200 |
| C | -3.55287300 | 1.16258700  | -1.81021700 |
| H | -3.72087600 | 0.36610500  | -1.09345000 |
| C | -4.60313600 | 1.72121300  | -2.50767700 |
| H | -5.61267900 | 1.35325100  | -2.36236500 |
| C | -4.36963500 | 2.79654300  | -3.41053000 |
| H | -5.20611900 | 3.22736200  | -3.95055800 |
| C | -3.09529300 | 3.30301300  | -3.59966300 |
| H | -2.94882500 | 4.12697500  | -4.28709100 |
| C | -1.99260000 | 2.75422300  | -2.89738800 |
| C | -0.63471600 | 3.21484300  | -3.03282800 |
| C | 0.36722200  | 2.57766700  | -2.24188500 |
| C | 1.73017500  | 2.96206200  | -2.33997200 |
| H | 2.47561900  | 2.43917000  | -1.74991100 |
| C | 2.09038400  | 3.97643000  | -3.20163000 |
| H | 3.12840700  | 4.27735700  | -3.29067900 |
| C | 1.09870900  | 4.63417900  | -3.98302800 |
| H | 1.39462600  | 5.43478900  | -4.65251600 |
| C | -0.23101200 | 4.26010700  | -3.90319300 |
| H | -0.96332200 | 4.77199500  | -4.51525700 |
| C | -2.96992200 | 0.95364000  | 1.99539100  |
| C | -3.46421500 | 2.12601900  | 2.59075200  |
| H | -2.80269400 | 2.96802500  | 2.75538000  |
| C | -4.80798700 | 2.18709900  | 2.97319400  |
| H | -5.18841800 | 3.08891800  | 3.44219600  |
| C | -5.66614300 | 1.09750800  | 2.75337200  |
| H | -6.70662000 | 1.15350000  | 3.05531300  |
| C | -5.16656300 | -0.06707300 | 2.15505600  |
| H | -5.81622400 | -0.92364100 | 2.00528700  |
| C | -3.81988300 | -0.14253300 | 1.78027000  |
| H | -3.42885500 | -1.07855000 | 1.38771600  |
| C | 1.32776200  | 2.68894800  | 2.18489800  |
| C | 1.35448700  | 2.77899200  | 3.58416100  |

|   |             |             |            |
|---|-------------|-------------|------------|
| H | 0.68405900  | 2.16639900  | 4.17717000 |
| C | 2.24937600  | 3.66142400  | 4.19945900 |
| H | 2.27015600  | 3.73595000  | 5.28183700 |
| C | 3.12358900  | 4.44117800  | 3.42682200 |
| H | 3.81732400  | 5.12095500  | 3.91015300 |
| C | 3.09027200  | 4.34600900  | 2.02802700 |
| H | 3.74952300  | 4.96478000  | 1.42725600 |
| C | 2.18965700  | 3.47386500  | 1.40457400 |
| H | 2.12458700  | 3.44216200  | 0.32146900 |
| C | -1.32727100 | -2.68970800 | 2.18420500 |
| C | -2.18956500 | -3.47410600 | 1.40380300 |
| H | -2.12500800 | -3.44173800 | 0.32068600 |
| C | -3.08997100 | -4.34655600 | 2.02712900 |
| H | -3.74952400 | -4.96492300 | 1.42627400 |
| C | -3.12269500 | -4.44254400 | 3.42588000 |
| H | -3.81626900 | -5.12255500 | 3.90911300 |
| C | -2.24810900 | -3.66328500 | 4.19859600 |
| H | -2.26844600 | -3.73842200 | 5.28094000 |
| C | -1.35342100 | -2.78056100 | 3.58343000 |
| H | -0.68270700 | -2.16835400 | 4.17651200 |
| C | 2.97029700  | -0.95417800 | 1.99442900 |
| C | 3.46473200  | -2.12670700 | 2.58937800 |
| H | 2.80327000  | -2.96878100 | 2.75388200 |
| C | 4.80857100  | -2.18785100 | 2.97157100 |
| H | 5.18911300  | -3.08979000 | 3.44025200 |
| C | 5.66665200  | -1.09816500 | 2.75191700 |
| H | 6.70718100  | -1.15420800 | 3.05366800 |
| C | 5.16692800  | 0.06657100  | 2.15402500 |
| H | 5.81653200  | 0.92320600  | 2.00439100 |
| C | 3.82018200  | 0.14208800  | 1.77948400 |
| H | 3.42906100  | 1.07820700  | 1.38726400 |
| N | -0.77412100 | 1.73260800  | 2.01399700 |
| N | 0.77452700  | -1.73322900 | 2.01317100 |

**[Rh-2-B]**

|     |             |             |             |
|-----|-------------|-------------|-------------|
| 2 1 |             |             |             |
| Rh  | 1.25274700  | 0.04691000  | 0.03483200  |
| N   | -1.05358400 | -2.02985800 | 0.58795200  |
| N   | 1.30636900  | -1.95637700 | 0.61662400  |
| N   | 1.35115800  | -0.66713900 | -1.86291900 |
| N   | -1.00208400 | -0.54566400 | -2.05605600 |
| N   | 3.60021500  | 0.03345800  | -0.45256200 |
| C   | 2.47615400  | -2.79316100 | 0.63735300  |
| C   | 3.74245800  | -0.80465800 | -1.48618600 |

|   |             |             |             |
|---|-------------|-------------|-------------|
| C | 0.22069300  | -0.82731000 | -2.62369500 |
| C | 2.55222200  | -1.02602500 | -2.34289100 |
| C | 3.49568100  | -2.61086800 | 1.58397900  |
| H | 3.40126400  | -1.82968200 | 2.32968300  |
| C | 0.14100200  | -2.58801600 | 0.74558800  |
| H | 0.16924200  | -3.64580100 | 1.01665300  |
| C | -2.17315800 | -2.92081600 | 0.76991400  |
| C | 0.31480400  | -1.25956000 | -3.97664900 |
| C | 2.69552000  | -1.52345200 | -3.66790100 |
| H | 3.67439900  | -1.78078200 | -4.04535800 |
| C | -2.08083400 | -0.56167600 | -2.84312800 |
| H | -3.01609600 | -0.29476800 | -2.37848900 |
| C | 1.59392800  | -1.61597400 | -4.48244500 |
| H | 1.68768200  | -1.95197700 | -5.51020000 |
| C | 7.13470700  | 0.22352400  | 0.75352600  |
| H | 8.08960500  | -0.25967700 | 0.56935000  |
| C | 2.60248800  | -3.84972300 | -0.28334600 |
| H | 1.82099800  | -4.00933200 | -1.02270000 |
| C | 4.60739000  | -3.45878000 | 1.60625900  |
| H | 5.37730100  | -3.30717800 | 2.35847200  |
| C | -2.37324800 | -3.99025300 | -0.11675000 |
| H | -1.69482900 | -4.12304500 | -0.95638100 |
| C | -0.86010900 | -1.30434700 | -4.77261900 |
| H | -0.79595200 | -1.62122200 | -5.80877600 |
| C | 5.99876100  | -0.18139200 | -0.00251800 |
| C | -2.05787100 | -0.92525400 | -4.20799900 |
| H | -2.98191000 | -0.91483700 | -4.77264100 |
| C | 4.73541100  | -4.52539300 | 0.69671500  |
| C | 4.97732000  | -1.43552700 | -1.79643200 |
| H | 5.04034900  | -2.16376700 | -2.59309200 |
| C | 4.72749800  | 0.42774700  | 0.24260100  |
| C | 3.71199700  | -4.70324200 | -0.24903900 |
| H | 3.77739000  | -5.52418500 | -0.95819200 |
| C | -3.04758300 | -2.77348100 | 1.85762100  |
| H | -2.87984600 | -1.97199500 | 2.56988200  |
| C | 7.02725800  | 1.23575200  | 1.68474800  |
| H | 7.89501500  | 1.55517800  | 2.25201300  |
| C | -3.43206000 | -4.88924100 | 0.07645300  |
| H | -3.56291200 | -5.71782700 | -0.61407300 |
| C | 4.65539500  | 1.49997200  | 1.17506500  |
| H | 3.72970100  | 2.05185200  | 1.26335900  |
| C | 5.77847500  | 1.89452200  | 1.87374200  |
| H | 5.72036200  | 2.73660300  | 2.55642700  |
| C | 5.91231300  | -5.47061800 | 0.76576300  |
| H | 6.82531700  | -4.95773700 | 1.08522900  |
| H | 6.10901500  | -5.94321300 | -0.20152200 |



|    |             |             |             |
|----|-------------|-------------|-------------|
| H  | 5.72422300  | -6.27481700 | 1.48751900  |
| C  | -4.10513000 | -3.66773900 | 2.04065900  |
| H  | -4.76715300 | -3.54582800 | 2.89427000  |
| C  | -4.31863900 | -4.74292000 | 1.15493900  |
| C  | -5.45153900 | -5.71661800 | 1.38190300  |
| H  | -6.41013700 | -5.19733000 | 1.49184100  |
| H  | -5.29236100 | -6.29932500 | 2.29682600  |
| H  | -5.54643400 | -6.42433800 | 0.55344900  |
| Rh | -1.25283000 | -0.04680800 | -0.03496200 |
| N  | 1.05348800  | 2.02991500  | -0.58824900 |
| N  | -1.30646600 | 1.95655000  | -0.61653100 |
| N  | -1.35124600 | 0.66708500  | 1.86283800  |
| N  | 1.00204300  | 0.54613700  | 2.05581400  |
| N  | -3.60007300 | -0.03353900 | 0.45227000  |
| C  | -2.47623100 | 2.79336600  | -0.63681800 |
| C  | -3.74255900 | 0.80422000  | 1.48615700  |
| C  | -0.22075500 | 0.82756800  | 2.62351400  |
| C  | -2.55235300 | 1.02578100  | 2.34285100  |
| C  | -3.49589600 | 2.61141800  | -1.58336300 |
| H  | -3.40158100 | 1.83051400  | -2.32937600 |
| C  | -0.14109100 | 2.58815500  | -0.74562600 |
| H  | -0.16933300 | 3.64597200  | -1.01657200 |
| C  | 2.17310300  | 2.92079900  | -0.77026600 |
| C  | -0.31485500 | 1.25999300  | 3.97641300  |
| C  | -2.69566400 | 1.52325800  | 3.66783900  |
| H  | -3.67456100 | 1.78041400  | 4.04536000  |
| C  | 2.08088200  | 0.56266900  | 2.84275400  |
| H  | 3.01617700  | 0.29597300  | 2.37805500  |
| C  | -1.59402700 | 1.61612600  | 4.48228200  |
| H  | -1.68777800 | 1.95222700  | 5.51000500  |
| C  | -7.13456100 | -0.22454500 | -0.75367900 |
| H  | -8.08962200 | 0.25825700  | -0.56930500 |
| C  | -2.60243300 | 3.84959900  | 0.28427600  |
| H  | -1.82082100 | 4.00895900  | 1.02355600  |
| C  | -4.60761500 | 3.45932900  | -1.60517100 |
| H  | -5.37763200 | 3.30800000  | -2.35733000 |
| C  | 2.37322900  | 3.99031600  | 0.11629900  |
| H  | 1.69478800  | 4.12324300  | 0.95589100  |
| C  | 0.86012700  | 1.30526700  | 4.77225400  |
| H  | 0.79597900  | 1.62228400  | 5.80836800  |
| C  | -5.99871800 | 0.18056100  | 0.00242000  |
| C  | 2.05795500  | 0.92649400  | 4.20755900  |
| H  | 2.98206300  | 0.91649100  | 4.77209600  |
| C  | -4.73551200 | 4.52560600  | -0.69521600 |
| C  | -4.97763700 | 1.43453500  | 1.79665100  |
| H  | -5.04092200 | 2.16248900  | 2.59354700  |

|   |             |             |             |
|---|-------------|-------------|-------------|
| C | -4.72724400 | -0.42804000 | -0.24294900 |
| C | -3.71195400 | 4.70312200  | 0.25044700  |
| H | -3.77724200 | 5.52381300  | 0.95990200  |
| C | 3.04757000  | 2.77328500  | -1.85791400 |
| H | 2.87982700  | 1.97171500  | -2.57007800 |
| C | -7.02679700 | -1.23646000 | -1.68520400 |
| H | -7.89447000 | -1.55603700 | -2.25251300 |
| C | 3.43210500  | 4.88921800  | -0.07695900 |
| H | 3.56298200  | 5.71786900  | 0.61348300  |
| C | -4.65480900 | -1.49996200 | -1.17573400 |
| H | -3.72891700 | -2.05146300 | -1.26426500 |
| C | -5.77778300 | -1.89471700 | -1.87446100 |
| H | -5.71939800 | -2.73657200 | -2.55740100 |
| C | -5.91242500 | 5.47085500  | -0.76374000 |
| H | -6.82538000 | 4.95817800  | -1.08366700 |
| H | -6.10924600 | 5.94277600  | 0.20385000  |
| H | -5.72426400 | 6.27556000  | -1.48491400 |
| C | 4.10518200  | 3.66745400  | -2.04100000 |
| H | 4.76724500  | 3.54539800  | -2.89456000 |
| C | 4.31871600  | 4.74272500  | -1.15539500 |
| C | 5.45166200  | 5.71635000  | -1.38243800 |
| H | 6.41016800  | 5.19698600  | -1.49279800 |
| H | 5.29227400  | 6.29931300  | -2.29716300 |
| H | 5.54687700  | 6.42385100  | -0.55383200 |
| N | 6.08485300  | -1.15817100 | -1.02898000 |
| N | -6.08511300 | 1.15699400  | 1.02918100  |

**[Rh-2-C]**

|     |             |             |             |
|-----|-------------|-------------|-------------|
| 2 1 |             |             |             |
| Rh  | -1.23945700 | -0.01894700 | 0.50540800  |
| Rh  | 1.23945600  | 0.01897600  | 0.50541800  |
| N   | 1.16835200  | 1.26690900  | -1.11282500 |
| N   | -1.12018800 | 1.66976100  | -0.70655800 |
| N   | 1.12019300  | -1.66980000 | -0.70645600 |
| N   | -1.16834900 | -1.26698400 | -1.11275800 |
| N   | 1.16667300  | -1.23133800 | 2.17821900  |
| N   | -1.12135800 | -1.67060200 | 1.78190000  |
| N   | -3.58388000 | -0.77745800 | 0.83337100  |
| N   | -5.66749700 | -2.67624700 | 0.57945700  |
| N   | -1.16669900 | 1.23146100  | 2.17813500  |
| N   | 1.12134800  | 1.67067700  | 1.78185600  |
| N   | 3.58386700  | 0.77750600  | 0.83334200  |
| N   | 5.66749700  | 2.67628900  | 0.57944500  |
| C   | 5.69108200  | 2.97614600  | -4.30031800 |
| H   | 6.39080900  | 2.15831100  | -4.49691700 |

|   |             |             |             |
|---|-------------|-------------|-------------|
| H | 6.24793600  | 3.79306500  | -3.82987100 |
| H | 5.33533800  | 3.34263400  | -5.27096500 |
| C | 4.53527900  | 2.52415600  | -3.43917800 |
| C | 4.18314900  | 1.16670600  | -3.34183000 |
| H | 4.76500600  | 0.42562500  | -3.88332200 |
| C | 3.08923800  | 0.75050100  | -2.57446900 |
| H | 2.82830600  | -0.29678800 | -2.51797300 |
| C | 2.31684100  | 1.68458700  | -1.87540100 |
| C | 2.67071300  | 3.04502800  | -1.94704000 |
| H | 2.09342000  | 3.78544600  | -1.39799300 |
| C | 3.76052000  | 3.45428400  | -2.72246300 |
| H | 4.01461000  | 4.50975400  | -2.77099400 |
| C | -5.14074500 | 5.68843300  | -1.86485900 |
| H | -4.64495200 | 6.61678700  | -2.17360600 |
| H | -5.75833200 | 5.92435000  | -0.99274000 |
| H | -5.80596900 | 5.39201300  | -2.68197200 |
| C | -4.12374800 | 4.61437600  | -1.55594300 |
| C | -3.60222600 | 3.79303800  | -2.57175200 |
| H | -3.94942600 | 3.92245300  | -3.59320300 |
| C | -2.63754200 | 2.81835800  | -2.29624800 |
| H | -2.24204700 | 2.21301600  | -3.10683400 |
| C | -2.16060700 | 2.62941500  | -0.98674800 |
| C | -2.65660700 | 3.46377400  | 0.02811000  |
| H | -2.26695100 | 3.37612300  | 1.03537000  |
| C | -3.63108100 | 4.43000600  | -0.25165200 |
| H | -3.99776900 | 5.06565100  | 0.54999000  |
| C | 0.02857800  | 1.90100800  | -1.34647300 |
| H | 0.03633100  | 2.68994300  | -2.10033000 |
| C | 5.14076100  | -5.68849500 | -1.86463800 |
| H | 5.80604100  | -5.39207500 | -2.68170600 |
| H | 4.64495000  | -6.61682200 | -2.17345100 |
| H | 5.75828400  | -5.92446500 | -0.99249300 |
| C | 4.12377600  | -4.61442100 | -1.55574700 |
| C | 3.63117600  | -4.42994800 | -0.25144500 |
| H | 3.99792500  | -5.06551300 | 0.55023000  |
| C | 2.65669600  | -3.46371300 | 0.02828600  |
| H | 2.26709400  | -3.37598200 | 1.03555900  |
| C | 2.16062500  | -2.62945000 | -0.98661500 |
| C | 2.63750000  | -2.81849000 | -2.29612300 |
| H | 2.24195800  | -2.21322000 | -3.10674000 |
| C | 3.60218800  | -3.79317400 | -2.57159700 |
| H | 3.94934200  | -3.92266000 | -3.59305500 |
| C | -5.69108600 | -2.97639500 | -4.30015900 |
| H | -5.33525000 | -3.34464600 | -5.27010100 |
| H | -6.38989900 | -2.15814400 | -4.49825400 |
| H | -6.24898900 | -3.79208400 | -3.82880500 |

|   |             |             |             |
|---|-------------|-------------|-------------|
| C | -4.53525300 | -2.52433600 | -3.43909300 |
| C | -3.76041400 | -3.45445100 | -2.72243400 |
| H | -4.01443800 | -4.50993600 | -2.77100900 |
| C | -2.67062300 | -3.04516400 | -1.94701700 |
| H | -2.09328000 | -3.78557200 | -1.39800800 |
| C | -2.31682600 | -1.68469900 | -1.87533000 |
| C | -3.08929200 | -0.75063600 | -2.57434000 |
| H | -2.82842200 | 0.29666700  | -2.51781600 |
| C | -4.18319900 | -1.16687700 | -3.34170200 |
| H | -4.76510200 | -0.42580700 | -3.88315700 |
| C | -0.02856700 | -1.90108100 | -1.34637000 |
| H | -0.03630500 | -2.69004800 | -2.10019200 |
| C | 2.27772800  | -1.43295300 | 2.89585000  |
| H | 3.13562800  | -0.83547000 | 2.61550400  |
| C | 2.36882900  | -2.38838000 | 3.93232000  |
| H | 3.30092500  | -2.49999100 | 4.47215200  |
| C | 1.26821100  | -3.17433500 | 4.20585600  |
| H | 1.30013800  | -3.94111400 | 4.97363000  |
| C | 0.07075400  | -2.96998700 | 3.46935400  |
| C | 0.03673400  | -1.95735400 | 2.47031000  |
| C | -1.10863500 | -3.73050200 | 3.69873500  |
| H | -1.10685400 | -4.51107300 | 4.45284100  |
| C | -2.24007700 | -3.45281000 | 2.97343100  |
| H | -3.15281500 | -4.00280900 | 3.15480500  |
| C | -2.22678800 | -2.39420500 | 2.01868300  |
| C | -3.46909000 | -2.02379300 | 1.31171000  |
| C | -4.52162600 | -2.97819600 | 1.16315600  |
| H | -4.40157600 | -4.00282200 | 1.49258300  |
| C | -5.83999500 | -1.39095600 | 0.13533900  |
| C | -4.78687400 | -0.42079000 | 0.25913900  |
| C | -7.08079000 | -1.02533700 | -0.44686100 |
| H | -7.84605600 | -1.78886000 | -0.52693500 |
| C | -7.27967700 | 0.27160500  | -0.87471600 |
| H | -8.22849800 | 0.56308200  | -1.31271000 |
| C | -6.24188300 | 1.23990300  | -0.73634100 |
| H | -6.41441100 | 2.25810000  | -1.06898000 |
| C | -5.02076200 | 0.90345100  | -0.18836700 |
| H | -4.23696500 | 1.63919100  | -0.09211800 |
| C | -2.27777300 | 1.43312300  | 2.89572500  |
| H | -3.13567900 | 0.83565600  | 2.61536600  |
| C | -2.36888000 | 2.38856800  | 3.93217700  |
| H | -3.30099200 | 2.50021700  | 4.47197300  |
| C | -1.26824400 | 3.17448500  | 4.20574700  |
| H | -1.30016900 | 3.94127000  | 4.97351500  |
| C | -0.07077000 | 2.97009100  | 3.46928600  |
| C | -0.03675100 | 1.95745300  | 2.47024500  |

|   |            |             |             |
|---|------------|-------------|-------------|
| C | 1.10863700 | 3.73056400  | 3.69870900  |
| H | 1.10686100 | 4.51112900  | 4.45282200  |
| C | 2.24009000 | 3.45284100  | 2.97343500  |
| H | 3.15284200 | 4.00280500  | 3.15484300  |
| C | 2.22679000 | 2.39425400  | 2.01866800  |
| C | 3.46908900 | 2.02383600  | 1.31169500  |
| C | 4.52162700 | 2.97823800  | 1.16314600  |
| H | 4.40159000 | 4.00285500  | 1.49260100  |
| C | 5.83998400 | 1.39100500  | 0.13530700  |
| C | 4.78685700 | 0.42084100  | 0.25909700  |
| C | 7.08077300 | 1.02539000  | -0.44690700 |
| H | 7.84603900 | 1.78891400  | -0.52697400 |
| C | 7.27965700 | -0.27154800 | -0.87477500 |
| H | 8.22847800 | -0.56302300 | -1.31277100 |
| C | 6.24186100 | -1.23984300 | -0.73640700 |
| H | 6.41438300 | -2.25803900 | -1.06905300 |
| C | 5.02074200 | -0.90339400 | -0.18842700 |
| H | 4.23694700 | -1.63913400 | -0.09218200 |

**[Rh-2-D]**

2 1

|    |             |             |             |
|----|-------------|-------------|-------------|
| Rh | -1.32485700 | 1.27333400  | -0.09111300 |
| Rh | -1.32499400 | -1.27332700 | 0.09105000  |
| N  | -2.95333200 | 1.02207400  | -1.28796400 |
| N  | 0.44129000  | 1.68397400  | 0.95006900  |
| N  | -0.00059200 | -1.46163600 | 1.69105100  |
| N  | -0.00041700 | 1.46156700  | -1.69106200 |
| N  | -2.55598500 | 1.25488300  | 1.53577400  |
| F  | -6.24985800 | 5.45995500  | -2.11247700 |
| N  | 0.44113900  | -1.68405500 | -0.95007300 |
| N  | -2.95347600 | -1.02195200 | 1.28787800  |
| N  | -2.55610000 | -1.25478900 | -1.53585400 |
| F  | -3.16797400 | -5.94508800 | -4.52385200 |
| F  | -3.16731700 | 5.94538800  | 4.52358900  |
| N  | 5.08953800  | 2.75621300  | 0.14641400  |
| C  | 1.51476600  | 1.87822100  | 0.12488400  |
| C  | 1.51460300  | -1.87834100 | -0.12487800 |
| C  | -3.24867100 | -0.15641300 | -1.82293300 |
| H  | -4.07849900 | -0.21806100 | -2.52979700 |
| C  | -3.81205000 | 2.14622600  | -1.50427000 |
| C  | 1.27501000  | -1.76030200 | 1.30251500  |
| C  | 2.78266300  | 2.22269500  | 0.61255100  |
| C  | -0.28736500 | 1.39272100  | -3.00276300 |
| H  | -1.31339800 | 1.17148900  | -3.26396300 |
| C  | 2.30459900  | 1.98902400  | -2.22619600 |

|   |             |             |             |
|---|-------------|-------------|-------------|
| N | 4.62047200  | -2.52973200 | 2.62915100  |
| C | 1.27518500  | 1.76019600  | -1.30251400 |
| N | 5.08933800  | -2.75645600 | -0.14637000 |
| C | -5.19978500 | 2.05162200  | -1.29501100 |
| H | -5.63331100 | 1.11690200  | -0.95278000 |
| C | 2.94148700  | 2.37136500  | 2.00612900  |
| H | 3.91567200  | 2.64729700  | 2.39307300  |
| C | 3.88230400  | 2.44009500  | -0.33017400 |
| C | -2.68679800 | -3.69969200 | -1.67428700 |
| H | -2.58390900 | -3.76059300 | -0.59627600 |
| C | 0.59927500  | 1.83658800  | 2.27552100  |
| H | -0.27963200 | 1.70049300  | 2.89060600  |
| C | 1.84113700  | -2.18019900 | -2.83694600 |
| H | 1.92105900  | -2.30616300 | -3.90983100 |
| C | 2.30440200  | -1.98917000 | 2.22620700  |
| C | -2.74303300 | -2.44456600 | -2.30652300 |
| C | -3.25473100 | 3.37091900  | -1.91845500 |
| H | -2.18809500 | 3.44596400  | -2.10902000 |
| C | 3.64419500  | -2.32531000 | 1.74069000  |
| N | 4.62068800  | 2.52952500  | -2.62911300 |
| C | 2.94130200  | -2.37160500 | -2.00610800 |
| H | 3.91547400  | -2.64760100 | -2.39303700 |
| C | -0.28754800 | -1.39279400 | 3.00274100  |
| H | -1.31357300 | -1.17152400 | 3.26395400  |
| C | 1.99688600  | 1.90888000  | -3.60000800 |
| H | 2.78406600  | 2.09478100  | -4.32166600 |
| C | -4.06859100 | 4.48996300  | -2.11914000 |
| H | -3.66360800 | 5.44114900  | -2.44639500 |
| C | 6.09808800  | 2.97614600  | -0.74457200 |
| C | 3.64440100  | 2.32511600  | -1.74066300 |
| C | 0.59911900  | -1.83671200 | -2.27552000 |
| H | -0.27977400 | -1.70057700 | -2.89061600 |
| C | 1.84130900  | 2.17998700  | 2.83695900  |
| H | 1.92124100  | 2.30591400  | 3.90984800  |
| C | -3.81225900 | -2.14602600 | 1.50431200  |
| C | -2.68606900 | 3.69979700  | 1.67419100  |
| H | -2.58291000 | 3.76065200  | 0.59620100  |
| C | 2.78248200  | -2.22288400 | -0.61253300 |
| C | 3.88211000  | -2.44030900 | 0.33020100  |
| F | -6.25028000 | -5.45955300 | 2.11280100  |
| C | -3.24863400 | 0.15655900  | 1.82289100  |
| H | -4.07841200 | 0.21828200  | 2.52979800  |
| C | 1.99667500  | -1.90903400 | 3.60002400  |
| H | 2.78384700  | -2.09497500 | 4.32167900  |
| C | -5.44015100 | 4.35740800  | -1.91102100 |
| C | -2.74279900 | 2.44469100  | 2.30642900  |

|   |             |             |             |
|---|-------------|-------------|-------------|
| C | 0.69209800  | -1.61238500 | 3.98590700  |
| H | 0.41602200  | -1.56011400 | 5.03224300  |
| C | -2.93694300 | -2.38571400 | -3.70162900 |
| H | -2.95933900 | -1.42850500 | -4.21445400 |
| C | -2.93703600 | 2.38593000  | 3.70149300  |
| H | -2.95978700 | 1.42875900  | 4.21437000  |
| C | -3.02869000 | -4.78157800 | -3.78785800 |
| C | -2.82187700 | -4.87774400 | -2.41365600 |
| H | -2.79207200 | -5.85321400 | -1.94105600 |
| C | 6.92369900  | -3.09854100 | 3.07681800  |
| H | 6.72069800  | -3.01009200 | 4.13781200  |
| C | -3.09695900 | -3.55751900 | -4.44888500 |
| H | -3.26202000 | -3.53153600 | -5.52036300 |
| C | -6.02654400 | 3.15929400  | -1.50796800 |
| H | -7.09918600 | 3.10813400  | -1.35774300 |
| C | 0.69229900  | 1.61226900  | -3.98591000 |
| H | 0.41625400  | 1.56000200  | -5.03225400 |
| C | -5.20003800 | -2.05126200 | 1.29538200  |
| H | -5.63354500 | -1.11646900 | 0.95333000  |
| C | -3.02816500 | 4.78183400  | 3.78764300  |
| C | 5.85838700  | -2.86029900 | 2.16319700  |
| C | 8.40689300  | -3.55575700 | 1.18808900  |
| H | 9.39776800  | -3.83074600 | 0.84197700  |
| C | 7.39634800  | 3.32818800  | -0.27900700 |
| H | 7.55284100  | 3.41583200  | 0.78990900  |
| C | -3.25497900 | -3.37080700 | 1.91828400  |
| H | -2.18830800 | -3.44597900 | 2.10861000  |
| C | 6.09787900  | -2.97640100 | 0.74462400  |
| C | -2.82099700 | 4.87791100  | 2.41349100  |
| H | -2.79080500 | 5.85335800  | 1.94086900  |
| C | 7.39613600  | -3.32847100 | 0.27906900  |
| H | 7.55264000  | -3.41610300 | -0.78984600 |
| C | 5.85860500  | 2.86005700  | -2.16314900 |
| C | -3.09691000 | 3.55780200  | 4.44867200  |
| H | -3.26220900 | 3.53188500  | 5.52011500  |
| C | 8.40712200  | 3.55544200  | -1.18801400 |
| H | 9.39800000  | 3.83040700  | -0.84188900 |
| C | -5.44050000 | -4.35707500 | 1.91126600  |
| C | 8.16957900  | 3.43944500  | -2.59577300 |
| H | 8.98567800  | 3.62830400  | -3.28534000 |
| C | -6.02686100 | -3.15886400 | 1.50844500  |
| H | -7.09953300 | -3.10758900 | 1.35847700  |
| C | 6.92393300  | 3.09827200  | -3.07676000 |
| H | 6.72093300  | 3.00984800  | -4.13775600 |
| C | -4.06891200 | -4.48978100 | 2.11908100  |
| H | -3.66395700 | -5.44102300 | 2.44620600  |

|   |            |             |            |
|---|------------|-------------|------------|
| C | 8.16933900 | -3.43975500 | 2.59584300 |
| H | 8.98542300 | -3.62865400 | 3.28541700 |

**[Rh-2-E]**

|     |             |             |             |
|-----|-------------|-------------|-------------|
| 2 1 |             |             |             |
| Rh  | 2.11536100  | -1.26956200 | -0.12891800 |
| Rh  | 2.11531000  | 1.26957700  | 0.12890000  |
| N   | 3.34777200  | 0.97225800  | 1.72863700  |
| N   | 3.74510400  | -1.22847100 | 1.09334200  |
| N   | 3.74503900  | 1.22852700  | -1.09338700 |
| N   | 3.34783600  | -0.97223400 | -1.72863300 |
| N   | 0.79171800  | -1.72881400 | 1.41440700  |
| N   | 0.34908700  | -1.49003300 | -1.22329200 |
| N   | 0.34902800  | 1.49004700  | 1.22328800  |
| N   | 0.79166400  | 1.72884900  | -1.41440600 |
| N   | -3.82758100 | -2.91949700 | 2.16288000  |
| N   | -4.29894600 | -2.66208200 | -0.61832300 |
| N   | -4.29902800 | 2.66197600  | 0.61830200  |
| N   | -3.82764800 | 2.91944600  | -2.16289300 |
| C   | 6.23310500  | -4.62011800 | 1.13937200  |
| C   | 6.81975500  | -3.37018000 | 0.95216900  |
| H   | 7.89288900  | -3.29330900 | 0.81720100  |
| C   | 5.99258200  | -2.24268100 | 0.93081100  |
| H   | 6.42627100  | -1.26267200 | 0.75681800  |
| C   | 4.60409400  | -2.37250200 | 1.11482400  |
| C   | 4.04656500  | -3.65071700 | 1.30812600  |
| H   | 2.97920400  | -3.75789600 | 1.47806600  |
| C   | 4.86088800  | -4.78724900 | 1.31549200  |
| H   | 4.45546900  | -5.78086100 | 1.47114400  |
| C   | 4.04007000  | -0.15920300 | 1.82278100  |
| H   | 4.86971000  | -0.21986700 | 2.52998700  |
| C   | 3.73071000  | 1.71354300  | 4.05640500  |
| H   | 3.75250900  | 0.68238800  | 4.39689200  |
| C   | 3.53545300  | 2.01144000  | 2.69240200  |
| C   | 3.47874800  | 3.35668700  | 2.28581600  |
| H   | 3.37389300  | 3.60213000  | 1.23458300  |
| C   | 3.61499300  | 4.38994400  | 3.21664700  |
| H   | 3.58457800  | 5.43213900  | 2.91885700  |
| C   | 3.82325600  | 4.05875400  | 4.55352400  |
| C   | 3.89164400  | 2.73928100  | 4.99401800  |
| H   | 4.05715800  | 2.52920900  | 6.04494500  |
| C   | 3.89174200  | -2.73922000 | -4.99403200 |
| H   | 4.05716600  | -2.52916000 | -6.04497500 |
| C   | 3.73071600  | -1.71350200 | -4.05642200 |
| H   | 3.75233000  | -0.68232700 | -4.39687700 |



|   |             |             |             |
|---|-------------|-------------|-------------|
| C | 3.53559500  | -2.01141700 | -2.69239700 |
| C | 3.47909800  | -3.35665900 | -2.28577700 |
| H | 3.37432800  | -3.60208900 | -1.23452900 |
| C | 3.61543600  | -4.38990500 | -3.21661300 |
| H | 3.58519100  | -5.43210300 | -2.91882300 |
| C | 3.82357400  | -4.05869600 | -4.55350000 |
| C | 4.04006600  | 0.15926400  | -1.82280300 |
| H | 4.86967800  | 0.21996900  | -2.53004500 |
| C | 4.60397500  | 2.37258700  | -1.11483200 |
| C | 4.04640400  | 3.65079600  | -1.30807100 |
| H | 2.97903500  | 3.75795200  | -1.47798400 |
| C | 4.86068400  | 4.78735600  | -1.31538100 |
| H | 4.45521900  | 5.78095900  | -1.47097900 |
| C | 6.23291100  | 4.62027100  | -1.13927600 |
| C | 6.81960300  | 3.37034400  | -0.95214600 |
| H | 7.89274300  | 3.29349100  | -0.81720400 |
| C | 5.99247000  | 2.24281300  | -0.93083900 |
| H | 6.42620500  | 1.26281100  | -0.75690800 |
| C | 1.08241800  | -1.88864200 | 2.71808100  |
| H | 2.10983900  | -1.71932100 | 3.01048400  |
| C | 0.10382200  | -2.27060600 | 3.64999300  |
| H | 0.38133900  | -2.40118500 | 4.68910000  |
| C | -1.20313700 | -2.48998900 | 3.22114100  |
| H | -1.99057700 | -2.79401400 | 3.90116900  |
| C | -1.51432500 | -2.33033400 | 1.85562600  |
| C | -0.48505900 | -1.95037600 | 0.98323800  |
| C | -0.72569100 | -1.81879600 | -0.44480300 |
| C | -1.99466300 | -2.06733300 | -0.98457500 |
| C | -2.15184400 | -1.97091300 | -2.38238300 |
| H | -3.12737400 | -2.17016500 | -2.81072000 |
| C | -1.04985700 | -1.64365900 | -3.16792000 |
| H | -1.12991200 | -1.58047300 | -4.24632100 |
| C | 0.19261700  | -1.40917300 | -2.55587500 |
| H | 1.07285300  | -1.17172800 | -3.13709300 |
| C | -2.85932300 | -2.57211700 | 1.32509500  |
| C | -3.09994400 | -2.43997300 | -0.09570900 |
| C | -5.07902200 | -3.16277000 | 1.65004400  |
| C | -5.32061600 | -3.03136600 | 0.22365900  |
| C | -6.59800900 | -3.28974500 | -0.28965000 |
| H | -6.75644200 | -3.19095100 | -1.35824800 |
| C | -6.12582700 | -3.54532600 | 2.49868700  |
| H | -5.92344700 | -3.64148100 | 3.56009100  |
| C | -7.40240700 | -3.80657500 | 1.98410800  |
| C | -7.64357100 | -3.67649100 | 0.55908200  |
| C | -8.95915400 | -3.95525000 | 0.05183100  |
| H | -9.13924800 | -3.86229800 | -1.01478100 |

|   |              |             |             |
|---|--------------|-------------|-------------|
| C | -9.96777200  | -4.33736500 | 0.89932100  |
| H | -10.95832400 | -4.55035400 | 0.51098300  |
| C | -9.72898000  | -4.46559200 | 2.31125900  |
| H | -10.54444200 | -4.77209700 | 2.95809500  |
| C | -8.48803500  | -4.20854700 | 2.83603400  |
| H | -8.30734600  | -4.30902300 | 3.90184900  |
| C | 1.08237500   | 1.88869900  | -2.71807600 |
| H | 2.10980500   | 1.71941400  | -3.01046700 |
| C | 0.10377700   | 2.27065000  | -3.64999200 |
| H | 0.38129300   | 2.40124900  | -4.68909600 |
| C | -1.20319000  | 2.48999800  | -3.22114700 |
| H | -1.99063300  | 2.79401400  | -3.90117700 |
| C | -1.51438400  | 2.33032800  | -1.85563600 |
| C | -0.48511600  | 1.95038500  | -0.98324300 |
| C | -0.72575000  | 1.81878600  | 0.44479800  |
| C | 0.19256000   | 1.40916600  | 2.55587100  |
| H | 1.07280400   | 1.17174700  | 3.13708900  |
| C | -1.04992800  | 1.64360100  | 3.16790900  |
| H | -1.12998900  | 1.58040200  | 4.24630800  |
| C | -2.15192200  | 1.97082900  | 2.38236900  |
| H | -3.12746000  | 2.17004100  | 2.81070500  |
| C | -1.99473600  | 2.06727500  | 0.98456400  |
| C | -3.10002000  | 2.43989400  | 0.09569300  |
| C | -2.85938700  | 2.57207600  | -1.32510700 |
| C | -5.32069800  | 3.03125900  | -0.22368100 |
| C | -5.07909600  | 3.16268700  | -1.65006300 |
| C | -6.12590100  | 3.54524500  | -2.49870500 |
| H | -5.92351800  | 3.64141800  | -3.56010700 |
| C | -6.59809900  | 3.28960500  | 0.28962400  |
| H | -6.75653700  | 3.19078400  | 1.35821900  |
| C | -7.64366100  | 3.67635000  | -0.55910900 |
| C | -7.40248900  | 3.80646700  | -1.98413100 |
| C | -8.48811500  | 4.20843900  | -2.83605700 |
| H | -8.30741900  | 4.30894100  | -3.90186800 |
| C | -9.72906800  | 4.46545800  | -2.31128700 |
| H | -10.54452700 | 4.77196800  | -2.95812400 |
| C | -9.96786800  | 4.33719800  | -0.89935300 |
| H | -10.95842500 | 4.55016500  | -0.51101500 |
| C | -8.95925100  | 3.95508000  | -0.05186300 |
| H | -9.13935500  | 3.86210600  | 1.01474500  |
| F | 3.96411100   | -5.07844600 | -5.47879200 |
| F | 7.04320900   | 5.74103300  | -1.15026500 |
| F | 7.04344700   | -5.74085200 | 1.15041600  |
| F | 3.96370000   | 5.07850900  | 5.47882000  |

[Rh-2-F]

|     |             |             |             |
|-----|-------------|-------------|-------------|
| 2 1 |             |             |             |
| Rh  | -2.14450300 | 1.26640900  | 0.24754400  |
| Rh  | -2.14949300 | -1.25834500 | -0.13123300 |
| N   | -0.86154200 | 1.82080600  | -1.30922800 |
| N   | -0.82906600 | -1.81618100 | 1.38779600  |
| N   | -3.28982000 | 0.88069000  | 1.88226400  |
| N   | -0.37808100 | -1.42500600 | -1.23252600 |
| N   | -0.33592200 | 1.40094800  | 1.29260900  |
| N   | -3.36842500 | -0.88612100 | -1.70948600 |
| N   | -3.77283700 | -1.25097400 | 1.09520500  |
| N   | -3.80759700 | 1.27129600  | -0.95156300 |
| C   | 0.43162000  | 1.99704800  | -0.90543400 |
| N   | 3.75310900  | 2.98492000  | -2.13088600 |
| C   | -3.36347600 | 1.83128000  | 2.94524100  |
| C   | -4.02108500 | -0.23381000 | 1.90671600  |
| H   | -4.84329900 | -0.32357100 | 2.61918600  |
| C   | 2.80648600  | 2.59874200  | -1.28576500 |
| C   | 0.69561000  | -1.78719800 | -0.46853400 |
| C   | 0.71725800  | 1.76398400  | 0.50138200  |
| C   | -1.18643500 | 2.07368400  | -2.58814700 |
| H   | -2.22315200 | 1.94017100  | -2.85889300 |
| N   | 4.31398200  | 2.51937400  | 0.60602800  |
| C   | -0.14608400 | -2.48873300 | 3.58907700  |
| H   | -0.42710800 | -2.68276600 | 4.61724000  |
| N   | 3.79801200  | -3.00626700 | 2.08618900  |
| C   | -0.23245000 | 2.50459700  | -3.52407700 |
| H   | -0.54093300 | 2.70933600  | -4.54221400 |
| C   | 1.16389300  | -2.67244100 | 3.15346300  |
| H   | 1.95116800  | -3.01019000 | 3.81743000  |
| C   | 2.01010500  | 1.94692500  | 1.01124400  |
| C   | -4.05982000 | 0.24957700  | -1.76069200 |
| H   | -4.87476700 | 0.33825900  | -2.48060200 |
| C   | -4.58099800 | 2.47632800  | -1.08644400 |
| C   | 3.09289700  | 2.36054200  | 0.11274100  |
| C   | -0.13236800 | 1.21600000  | 2.60840300  |
| H   | -0.99492400 | 0.95151000  | 3.20343200  |
| C   | 1.97046100  | -1.98791900 | -1.01498100 |
| C   | 1.09000000  | 2.67540800  | -3.12456600 |
| H   | 1.86139800  | 3.01209200  | -3.80738300 |
| C   | 1.43925700  | 2.41900300  | -1.78371700 |
| C   | 0.44991300  | -2.00496800 | 0.94885400  |
| C   | -3.65820900 | 1.45020000  | 4.26843500  |
| H   | -3.84791900 | 0.40903900  | 4.51448900  |
| C   | 1.47865300  | -2.42816500 | 1.80168200  |
| N   | 4.28119900  | -2.57242200 | -0.67072500 |

|   |             |             |             |
|---|-------------|-------------|-------------|
| C | 5.02724500  | 3.16457700  | -1.64714100 |
| C | 2.21592400  | 1.74284800  | 2.39028500  |
| H | 3.21071500  | 1.88926800  | 2.79476100  |
| C | 3.07627300  | -2.39969200 | -0.14369100 |
| C | 2.82948600  | -2.62198400 | 1.26542600  |
| C | -4.75325800 | 3.08995800  | -2.34155800 |
| H | -4.29811200 | 2.65993300  | -3.23075100 |
| C | 1.13608200  | 1.37765900  | 3.18918200  |
| H | 1.25252400  | 1.22879200  | 4.25571800  |
| C | 1.03290900  | -1.44455600 | -3.17405700 |
| H | 1.11781700  | -1.31474000 | -4.24607100 |
| C | -0.21581800 | -1.26341700 | -2.55680900 |
| H | -1.09710400 | -1.00532000 | -3.12762900 |
| C | -1.12340200 | -2.05643800 | 2.67774000  |
| H | -2.15256400 | -1.90890600 | 2.97559900  |
| C | 2.13462800  | -1.80479700 | -2.40278800 |
| H | 3.11517900  | -1.96475700 | -2.83591200 |
| C | 5.31465700  | 2.92620500  | -0.24462700 |
| C | -4.67946600 | -2.35923000 | 1.03704100  |
| C | -3.53086200 | -1.88326000 | -2.71885100 |
| C | -5.52544700 | 4.24987200  | -2.46562200 |
| H | -5.65581200 | 4.70177000  | -3.44476300 |
| C | 6.10388000  | -3.61719500 | 2.39801000  |
| H | 5.89644100  | -3.78101200 | 3.45013100  |
| C | 5.05623500  | -3.19948600 | 1.56717200  |
| C | -3.66847300 | -1.53715800 | -4.07699600 |
| H | -3.66887400 | -0.49259700 | -4.37892500 |
| C | -3.40970500 | 3.76011800  | 5.04031600  |
| C | -5.95622500 | 4.21917300  | -0.09616600 |
| H | -6.43197000 | 4.64439100  | 0.78345200  |
| C | -6.13485600 | 4.84198500  | -1.34558000 |
| C | -3.69389200 | 2.40587100  | 5.29024300  |
| H | -3.93600800 | 2.09076900  | 6.30158700  |
| C | -5.19669900 | 3.05349100  | 0.03617900  |
| H | -5.10590300 | 2.57277900  | 1.00171900  |
| C | -4.19445500 | -3.66695900 | 1.20103000  |
| H | -3.13891100 | -3.83490600 | 1.39990400  |
| C | 5.30377700  | -2.97746900 | 0.15440500  |
| C | -3.06997900 | 3.18296400  | 2.68872100  |
| H | -2.85608000 | 3.51180000  | 1.67421500  |
| C | -6.95105900 | 6.10632500  | -1.47285700 |
| H | -6.39871200 | 6.97200700  | -1.08752600 |
| H | -7.88391900 | 6.03731200  | -0.90366400 |
| H | -7.20838900 | 6.31660800  | -2.51474700 |
| C | 6.61514000  | 3.11867100  | 0.23895900  |
| H | 6.80779600  | 2.93941000  | 1.29136400  |

|   |             |             |             |
|---|-------------|-------------|-------------|
| C | -3.79709700 | -2.53240700 | -5.05151700 |
| H | -3.91646000 | -2.24574600 | -6.09280700 |
| C | 6.05292900  | 3.58398100  | -2.50416300 |
| H | 5.81577100  | 3.76016900  | -3.54797200 |
| C | -3.49959800 | -3.24375200 | -2.36944100 |
| H | -3.44621200 | -3.53263400 | -1.32445100 |
| C | 7.38763500  | -3.82627900 | 1.87742000  |
| C | -3.08423200 | 4.12437900  | 3.72123300  |
| H | -2.85590300 | 5.16259700  | 3.49628500  |
| C | 7.64003800  | 3.54170400  | -0.61759300 |
| C | 7.35280700  | 3.77912300  | -2.01952200 |
| C | -6.05060700 | -2.16079100 | 0.80340000  |
| H | -6.42995000 | -1.15516100 | 0.64327000  |
| C | 8.97944800  | 3.75329800  | -0.14047500 |
| H | 9.19400500  | 3.57958800  | 0.90960000  |
| C | -3.76469700 | -3.89742900 | -4.71179300 |
| C | 8.41815700  | 4.21651500  | -2.87992100 |
| H | 8.20271600  | 4.39714800  | -3.92862500 |
| C | -3.60268600 | -4.23010800 | -3.35495600 |
| H | -3.58162000 | -5.27656600 | -3.06306600 |
| C | -5.07131400 | -4.75649100 | 1.13591200  |
| H | -4.68377600 | -5.76228500 | 1.27115800  |
| C | -3.47228200 | 4.78920400  | 6.14433600  |
| H | -4.47958100 | 5.21607900  | 6.22406700  |
| H | -2.78078200 | 5.61771300  | 5.96279900  |
| H | -3.22745700 | 4.35141200  | 7.11695500  |
| C | -3.92757700 | -4.96829300 | -5.76455100 |
| H | -4.98000000 | -5.26158800 | -5.86265300 |
| H | -3.36058600 | -5.86994700 | -5.51297600 |
| H | -3.59350500 | -4.62173200 | -6.74722400 |
| C | -6.44771000 | -4.57192700 | 0.91701800  |
| C | -6.91882700 | -3.25485700 | 0.75347800  |
| H | -7.97764700 | -3.08687300 | 0.57588400  |
| C | 8.47494700  | -4.26216700 | 2.71063900  |
| H | 8.28935200  | -4.43052300 | 3.76706300  |
| C | 9.96742300  | 4.17207900  | -0.99481200 |
| H | 10.97606200 | 4.33373100  | -0.62877500 |
| C | 9.68283100  | 4.40683700  | -2.38436800 |
| H | 10.48270000 | 4.74016900  | -3.03744200 |
| C | 6.58808500  | -3.18390200 | -0.36518300 |
| H | 6.75083600  | -3.01670200 | -1.42459900 |
| C | 7.63497800  | -3.60524300 | 0.46525500  |
| C | -7.39999400 | -5.74335800 | 0.86658100  |
| H | -8.01605300 | -5.71700300 | -0.03886600 |
| H | -8.08365700 | -5.73168000 | 1.72353100  |
| H | -6.86661000 | -6.69791800 | 0.88206400  |

|   |             |             |             |
|---|-------------|-------------|-------------|
| C | 9.72318600  | -4.46632200 | 2.18009700  |
| H | 10.53973600 | -4.79846600 | 2.81281500  |
| C | 8.95827400  | -3.83097400 | -0.04883300 |
| H | 9.14293200  | -3.66949400 | -1.10651300 |
| C | 9.96822800  | -4.24780800 | 0.78041300  |
| H | 10.96454400 | -4.42016200 | 0.38657400  |

**[Rh-2-G]**

2 1

|    |             |             |             |
|----|-------------|-------------|-------------|
| Rh | -1.19319400 | -0.35647200 | -0.31746100 |
| Rh | 1.19320900  | 0.35645500  | -0.31744900 |
| N  | -0.69102700 | -1.62498800 | 1.21538300  |
| N  | 1.60736300  | -1.17736400 | 0.98322500  |
| N  | -1.60739300 | 1.17730700  | 0.98325800  |
| N  | 0.69099400  | 1.62493800  | 1.21542400  |
| N  | -1.62548800 | 0.98554600  | -1.82969500 |
| N  | 0.57184800  | 1.85311800  | -1.70992400 |
| N  | -0.57179600 | -1.85305700 | -1.71000500 |
| N  | 1.62552900  | -0.98546100 | -1.82974300 |
| N  | -3.39605400 | -0.74684000 | -0.73854300 |
| N  | 3.39608600  | 0.74685600  | -0.73847500 |
| C  | -1.98531900 | -3.69471500 | 1.57643700  |
| H  | -1.48817600 | -4.13832800 | 0.71745600  |
| C  | -2.91834900 | -4.43935900 | 2.31120400  |
| H  | -3.14379300 | -5.45962000 | 2.01319900  |
| C  | -3.55089500 | -3.89585300 | 3.44394600  |
| C  | -3.21606900 | -2.57975200 | 3.81806300  |
| H  | -3.67709000 | -2.14447300 | 4.70075600  |
| C  | -2.28320200 | -1.83190000 | 3.09021600  |
| H  | -2.01209400 | -0.82891100 | 3.40376300  |
| C  | -1.66492900 | -2.38099900 | 1.95612700  |
| C  | -4.52347800 | -4.71082900 | 4.26407400  |
| H  | -4.02716100 | -5.13549500 | 5.14503700  |
| H  | -4.93799000 | -5.54483100 | 3.68999600  |
| H  | -5.35685000 | -4.10029800 | 4.62639500  |
| C  | 0.58321500  | -1.84464800 | 1.51194300  |
| H  | 0.80966200  | -2.62968400 | 2.23746600  |
| C  | 2.91140200  | -1.76270900 | 1.15208500  |
| C  | 3.15334600  | -3.07028300 | 0.69430700  |
| H  | 2.35356500  | -3.62147200 | 0.20440600  |
| C  | 4.40609300  | -3.67266300 | 0.87184400  |
| H  | 4.56508400  | -4.69013500 | 0.52479100  |
| C  | 5.45610400  | -2.98700600 | 1.50406100  |
| C  | 5.20712400  | -1.67356700 | 1.94751800  |
| H  | 5.99936400  | -1.12525600 | 2.45117600  |

|   |             |             |             |
|---|-------------|-------------|-------------|
| C | 3.95761700  | -1.06991300 | 1.78110600  |
| H | 3.78358700  | -0.06950800 | 2.15723100  |
| C | 6.79658100  | -3.64484300 | 1.73575400  |
| H | 7.62233000  | -2.93918600 | 1.59721400  |
| H | 6.95498100  | -4.48896600 | 1.05789200  |
| H | 6.86930200  | -4.03061800 | 2.75988500  |
| C | -3.95763400 | 1.06976900  | 1.78112600  |
| H | -3.78360300 | 0.06934300  | 2.15719700  |
| C | -5.20717100 | 1.67338000  | 1.94755800  |
| H | -5.99938200 | 1.12499600  | 2.45118400  |
| C | -5.45618700 | 2.98682200  | 1.50417400  |
| C | -4.40617300 | 3.67255400  | 0.87201400  |
| H | -4.56519900 | 4.69004600  | 0.52503800  |
| C | -3.15341600 | 3.07022500  | 0.69445600  |
| H | -2.35364100 | 3.62145700  | 0.20459300  |
| C | -2.91143600 | 1.76261800  | 1.15216500  |
| C | -6.79668500 | 3.64462200  | 1.73585700  |
| H | -7.62235000 | 2.93861900  | 1.59858200  |
| H | -6.95563600 | 4.48792900  | 1.05711300  |
| H | -6.86895200 | 4.03154800  | 2.75958800  |
| C | -0.58324500 | 1.84460700  | 1.51196200  |
| H | -0.80969900 | 2.62965800  | 2.23746900  |
| C | 1.66490500  | 2.38093200  | 1.95616400  |
| C | 2.28321100  | 1.83179500  | 3.09021900  |
| H | 2.01209900  | 0.82880000  | 3.40374000  |
| C | 3.21610000  | 2.57961700  | 3.81806600  |
| H | 3.67714200  | 2.14430800  | 4.70073200  |
| C | 3.55092200  | 3.89573000  | 3.44398200  |
| C | 2.91834800  | 4.43927300  | 2.31127500  |
| H | 3.14378900  | 5.45954200  | 2.01329300  |
| C | 1.98529300  | 3.69465800  | 1.57650900  |
| H | 1.48814000  | 4.13830600  | 0.71755000  |
| C | 4.52353300  | 4.71068100  | 4.26410200  |
| H | 4.93822700  | 5.54454400  | 3.68995200  |
| H | 5.35677800  | 4.10008300  | 4.62659900  |
| H | 4.02718100  | 5.13554300  | 5.14495100  |
| C | 1.45448900  | 2.78753200  | -2.08091900 |
| H | 2.42569900  | 2.73885000  | -1.61315700 |
| C | 1.18288800  | 3.79992900  | -3.02907600 |
| H | 1.95768900  | 4.51521600  | -3.27592900 |
| C | -0.06398000 | 3.84457000  | -3.61377900 |
| H | -0.31750900 | 4.59952500  | -4.35130600 |
| C | -1.03661400 | 2.88662500  | -3.22439700 |
| C | -0.69326100 | 1.89879300  | -2.25788900 |
| C | -2.35769100 | 2.88635900  | -3.75003700 |
| H | -2.63540100 | 3.62293200  | -4.49724800 |

|   |             |             |             |
|---|-------------|-------------|-------------|
| C | -3.27098700 | 1.97013700  | -3.29140000 |
| H | -4.28215800 | 1.97965900  | -3.67100800 |
| C | -2.88402300 | 1.02682300  | -2.29946300 |
| C | -3.86210800 | 0.07556500  | -1.71582500 |
| C | -5.20483600 | 0.03729400  | -2.11533400 |
| H | -5.58198900 | 0.69211600  | -2.88915900 |
| C | -6.08135900 | -0.86036900 | -1.49488600 |
| H | -7.12371100 | -0.89925100 | -1.79183800 |
| C | -5.59285800 | -1.69643700 | -0.48650700 |
| H | -6.23656600 | -2.40141100 | 0.02627800  |
| C | -4.24063800 | -1.60682500 | -0.13616900 |
| H | -3.82304000 | -2.23144900 | 0.64240400  |
| C | -1.45443300 | -2.78744800 | -2.08105800 |
| H | -2.42561100 | -2.73886700 | -1.61321200 |
| C | -1.18287500 | -3.79969800 | -3.02938800 |
| H | -1.95767200 | -4.51497500 | -3.27627800 |
| C | 0.06394200  | -3.84419900 | -3.61421100 |
| H | 0.31743300  | -4.59902100 | -4.35188700 |
| C | 1.03658200  | -2.88628800 | -3.22475300 |
| C | 0.69328200  | -1.89862800 | -2.25805400 |
| C | 2.35761800  | -2.88589100 | -3.75050100 |
| H | 2.63527500  | -3.62229700 | -4.49789600 |
| C | 3.27093800  | -1.96975100 | -3.29174400 |
| H | 4.28206900  | -1.97914900 | -3.67146500 |
| C | 2.88404500  | -1.02665900 | -2.29956900 |
| C | 3.86215900  | -0.07552400 | -1.71577400 |
| C | 5.20492800  | -0.03734800 | -2.11514600 |
| H | 5.58211800  | -0.69220400 | -2.88892500 |
| C | 6.08145600  | 0.86024300  | -1.49459700 |
| H | 7.12384000  | 0.89905000  | -1.79144800 |
| C | 5.59291900  | 1.69633600  | -0.48625900 |
| H | 6.23662300  | 2.40126700  | 0.02659100  |
| C | 4.24066600  | 1.60678700  | -0.13602300 |
| H | 3.82305000  | 2.23140800  | 0.64254300  |

**[Rh-2-H]**

|     |             |             |             |
|-----|-------------|-------------|-------------|
| 2 1 |             |             |             |
| Rh  | -1.21952800 | 0.02200100  | 0.48166900  |
| Rh  | 1.21948800  | 0.02198200  | 0.48171300  |
| N   | -1.16859000 | 1.81604800  | -0.47356400 |
| N   | 1.16860900  | 1.81601100  | -0.47354200 |
| N   | -1.16649200 | -0.97193300 | -1.28524600 |
| N   | 1.16647500  | -0.97194200 | -1.28521200 |
| N   | -1.18348300 | -1.86138400 | 1.42649700  |
| N   | 1.18338700  | -1.86139000 | 1.42657600  |



|   |             |             |             |
|---|-------------|-------------|-------------|
| N | -1.18325900 | 0.99472400  | 2.34014000  |
| N | 1.18322100  | 0.99472600  | 2.34015900  |
| C | -3.33161000 | 2.94636600  | -0.12024700 |
| H | -3.12940000 | 2.98313500  | 0.94536100  |
| C | -4.51358800 | 3.50097300  | -0.62753500 |
| H | -5.23902200 | 3.93271100  | 0.05629800  |
| C | -4.76519200 | 3.53870400  | -2.01067800 |
| C | -3.79538600 | 2.99088200  | -2.87297800 |
| H | -3.96709000 | 3.00672900  | -3.94564400 |
| C | -2.62052300 | 2.42177900  | -2.37454600 |
| H | -1.89708100 | 1.97861600  | -3.05303100 |
| C | -2.37582500 | 2.39782900  | -0.98985700 |
| C | -6.02002400 | 4.17299800  | -2.56163600 |
| H | -6.43490400 | 3.58922600  | -3.38964700 |
| H | -5.81054100 | 5.17796400  | -2.94753100 |
| H | -6.79415500 | 4.27109900  | -1.79521400 |
| C | 0.00002200  | 2.33678000  | -0.83002700 |
| H | 0.00004400  | 3.25150700  | -1.42508800 |
| C | 2.37587400  | 2.39771900  | -0.98985500 |
| C | 2.62062600  | 2.42151000  | -2.37452500 |
| H | 1.89721000  | 1.97828100  | -3.05299600 |
| C | 3.79554000  | 2.99051900  | -2.87297300 |
| H | 3.96728600  | 3.00623300  | -3.94563300 |
| C | 4.76531900  | 3.53839800  | -2.01069700 |
| C | 4.51365800  | 3.50081700  | -0.62754800 |
| H | 5.23908900  | 3.93260000  | 0.05626200  |
| C | 3.33164900  | 2.94630900  | -0.12025400 |
| H | 3.12939200  | 2.98318000  | 0.94534300  |
| C | 6.02017300  | 4.17267300  | -2.56162600 |
| H | 6.43406900  | 3.58987200  | -3.39080400 |
| H | 6.79491900  | 4.26913900  | -1.79561300 |
| H | 5.81106800  | 5.17835800  | -2.94585600 |
| C | -3.59774200 | -0.87370400 | -1.45595700 |
| H | -3.57224700 | 0.14248900  | -1.07550200 |
| C | -4.83043600 | -1.45553800 | -1.77771900 |
| H | -5.74399600 | -0.89813000 | -1.59094000 |
| C | -4.90718500 | -2.72540300 | -2.37241500 |
| C | -3.69784400 | -3.41003900 | -2.60835800 |
| H | -3.72714300 | -4.39966500 | -3.05642200 |
| C | -2.46369800 | -2.85244400 | -2.26772500 |
| H | -1.56114800 | -3.43464800 | -2.42916900 |
| C | -2.39594800 | -1.56174900 | -1.70313600 |
| C | -6.23173300 | -3.33098400 | -2.77129300 |
| H | -7.06642400 | -2.86069100 | -2.24350700 |
| H | -6.26234600 | -4.40574300 | -2.56457700 |
| H | -6.41007100 | -3.20354400 | -3.84588600 |

|   |             |             |             |
|---|-------------|-------------|-------------|
| C | -0.00000100 | -1.31162200 | -1.82919200 |
| H | 0.00000100  | -1.88614600 | -2.75476900 |
| C | 2.39596200  | -1.56169700 | -1.70309600 |
| C | 2.46378100  | -2.85226100 | -2.26796500 |
| H | 1.56126200  | -3.43443700 | -2.42967600 |
| C | 3.69797000  | -3.40978500 | -2.60855800 |
| H | 3.72731100  | -4.39931300 | -3.05683900 |
| C | 4.90728600  | -2.72521600 | -2.37230000 |
| C | 4.83046600  | -1.45547700 | -1.77734600 |
| H | 5.74400600  | -0.89811400 | -1.59034300 |
| C | 3.59773200  | -0.87370900 | -1.45562200 |
| H | 3.57219300  | 0.14241800  | -1.07498800 |
| C | 6.23187300  | -3.33075400 | -2.77111500 |
| H | 6.26291400  | -4.40530600 | -2.56336000 |
| H | 7.06661400  | -2.85968100 | -2.24411500 |
| H | 6.40974000  | -3.20432200 | -3.84590400 |
| C | -2.33928700 | -2.48247400 | 1.68277200  |
| H | -3.24676100 | -1.96065300 | 1.40020300  |
| C | -2.41786500 | -3.76609100 | 2.27124300  |
| H | -3.38967500 | -4.20867700 | 2.45051800  |
| C | -1.24811800 | -4.42241600 | 2.59085700  |
| H | -1.26341300 | -5.41067500 | 3.04003300  |
| C | -0.00008200 | -3.79617500 | 2.31514000  |
| C | -0.00005900 | -2.49974600 | 1.72659900  |
| C | 1.24793000  | -4.42242200 | 2.59094000  |
| H | 1.26319200  | -5.41068200 | 3.04011500  |
| C | 2.41770400  | -3.76610100 | 2.27141100  |
| H | 3.38949800  | -4.20869100 | 2.45075300  |
| C | 2.33917100  | -2.48248200 | 1.68293600  |
| H | 3.24666700  | -1.96066100 | 1.40043800  |
| C | -2.33744600 | 1.29949900  | 2.94039100  |
| H | -3.24560000 | 1.01832500  | 2.41877200  |
| C | -2.41723000 | 1.96058300  | 4.18768600  |
| H | -3.38889300 | 2.17878200  | 4.61308100  |
| C | -1.24713000 | 2.31554900  | 4.82537300  |
| H | -1.26203900 | 2.82819800  | 5.78219200  |
| C | -0.00003700 | 1.99868800  | 4.21785000  |
| C | -0.00002700 | 1.33104800  | 2.95952100  |
| C | 1.24704700  | 2.31556700  | 4.82538600  |
| H | 1.26193700  | 2.82821900  | 5.78220400  |
| C | 2.41715600  | 1.96061900  | 4.18771100  |
| H | 3.38881300  | 2.17883600  | 4.61311100  |
| C | 2.33739400  | 1.29952300  | 2.94041900  |
| H | 3.24555900  | 1.01836000  | 2.41881100  |

[Mo-2-A]

|     |             |              |             |
|-----|-------------|--------------|-------------|
| 0 1 |             |              |             |
| C   | -0.15807300 | 2.80714600   | 0.21096600  |
| C   | -0.26979200 | 4.22735100   | 0.37159900  |
| C   | -0.37599600 | 5.42968500   | 0.53488600  |
| C   | -0.49744200 | 6.84951300   | 0.70017700  |
| C   | -0.65430500 | 7.68258600   | -0.42716000 |
| H   | -0.68499500 | 7.23629800   | -1.41631900 |
| C   | -0.77163100 | 9.06672100   | -0.26642800 |
| H   | -0.89342900 | 9.70282200   | -1.13787600 |
| C   | -0.73377600 | 9.63405500   | 1.01646500  |
| H   | -0.82548000 | 10.70920500  | 1.13875500  |
| C   | -0.57830800 | 8.80955700   | 2.14124000  |
| H   | -0.54955500 | 9.24652000   | 3.13476100  |
| C   | -0.46081000 | 7.42470100   | 1.98709900  |
| H   | -0.34121500 | 6.78139900   | 2.85315900  |
| C   | -0.22987700 | 2.92706400   | -2.21683100 |
| C   | -1.29487100 | 2.66083200   | -3.09340900 |
| H   | -2.05681200 | 1.94457000   | -2.79897000 |
| C   | -1.36684400 | 3.32513100   | -4.32436400 |
| H   | -2.19340400 | 3.11822300   | -4.99774000 |
| C   | -0.37949200 | 4.25261900   | -4.68684400 |
| H   | -0.43520200 | 4.76409300   | -5.64317500 |
| C   | 0.68713100  | 4.50874200   | -3.81165100 |
| H   | 1.46346500  | 5.21471600   | -4.09224600 |
| C   | 0.76681100  | 3.84665300   | -2.58089300 |
| H   | 1.60236700  | 4.02546300   | -1.91149200 |
| C   | 0.15316200  | -2.74550100  | -0.16297200 |
| C   | 0.26467600  | -4.16571900  | -0.32361400 |
| C   | 0.37063600  | -5.36808000  | -0.48687200 |
| C   | 0.49183200  | -6.78794000  | -0.65207600 |
| C   | 0.64853200  | -7.62096500  | 0.47532000  |
| H   | 0.67931600  | -7.17461400  | 1.46444800  |
| C   | 0.76560600  | -9.00513100  | 0.31468500  |
| H   | 0.88727000  | -9.64119500  | 1.18617800  |
| C   | 0.72766200  | -9.57254900  | -0.96817000 |
| H   | 0.81918000  | -10.64772300 | -1.09038400 |
| C   | 0.57235900  | -8.74809900  | -2.09300200 |
| H   | 0.54354500  | -9.18512500  | -3.08649400 |
| C   | 0.45510800  | -7.36321000  | -1.93895900 |
| H   | 0.33562700  | -6.71995000  | -2.80506600 |
| C   | 0.22520900  | -2.86531200  | 2.26487700  |
| C   | 1.29006700  | -2.59869800  | 3.14151300  |
| H   | 2.05185800  | -1.88227600  | 2.84706700  |
| C   | 1.36213800  | -3.26287900  | 4.37252400  |
| H   | 2.18859900  | -3.05569700  | 5.04593600  |

|   |             |             |             |
|---|-------------|-------------|-------------|
| C | 0.37502100  | -4.19061300 | 4.73502100  |
| H | 0.43082100  | -4.70200000 | 5.69139300  |
| C | -0.69147200 | -4.44710000 | 3.85978200  |
| H | -1.46764300 | -5.15325000 | 4.14038300  |
| C | -0.77125100 | -3.78513900 | 2.62895800  |
| H | -1.60673800 | -3.96423500 | 1.95955800  |
| C | 2.76904400  | 0.20018800  | -0.04172900 |
| C | 4.25275800  | 0.31914500  | -0.06599600 |
| C | 4.86609100  | 1.37288400  | 0.64490200  |
| C | 6.26879300  | 1.45355500  | 0.63347100  |
| H | 6.75722100  | 2.25981100  | 1.17383600  |
| C | 7.05829400  | 0.53197900  | -0.05855800 |
| C | 6.41785100  | -0.49970900 | -0.76499800 |
| H | 7.02060000  | -1.21838000 | -1.30930900 |
| C | 5.02601900  | -0.62908400 | -0.78722700 |
| C | 4.06879300  | 2.42542900  | 1.41402700  |
| H | 3.00963700  | 2.32573300  | 1.16222100  |
| C | 4.49198800  | 3.86157200  | 1.04563300  |
| H | 5.51767700  | 4.08017300  | 1.36442600  |
| H | 3.83154300  | 4.58316900  | 1.54090600  |
| H | 4.43306300  | 4.02948800  | -0.03614700 |
| C | 4.18767900  | 2.18871500  | 2.93405500  |
| H | 3.81567300  | 1.19325900  | 3.19630500  |
| H | 3.59767600  | 2.93193600  | 3.48358400  |
| H | 5.23068100  | 2.26764600  | 3.26526600  |
| C | 8.57626100  | 0.65005300  | -0.04858800 |
| H | 8.83629800  | 1.52458300  | 0.56306200  |
| C | 9.13566400  | 0.88833000  | -1.46633400 |
| H | 10.22418100 | 1.01833800  | -1.43404900 |
| H | 8.69513600  | 1.78263000  | -1.92090400 |
| H | 8.91913100  | 0.03747900  | -2.12319600 |
| C | 9.23707800  | -0.58511100 | 0.59746900  |
| H | 8.86810800  | -0.74438800 | 1.61678800  |
| H | 10.32591100 | -0.46104100 | 0.64039900  |
| H | 9.02604600  | -1.49230800 | 0.01884500  |
| C | 4.36240100  | -1.80885400 | -1.49905400 |
| H | 3.42952000  | -1.45141000 | -1.94332900 |
| C | 5.20780300  | -2.40774300 | -2.63501000 |
| H | 6.10249400  | -2.91749700 | -2.25682100 |
| H | 5.52497900  | -1.64062700 | -3.35066400 |
| H | 4.61508700  | -3.15307900 | -3.17758300 |
| C | 4.00529600  | -2.90886000 | -0.47148200 |
| H | 4.91492800  | -3.31322800 | -0.00987600 |
| H | 3.47206600  | -3.73201100 | -0.96095000 |
| H | 3.36497000  | -2.52562200 | 0.33082700  |
| C | -2.77384200 | -0.13641500 | 0.08982600  |

|    |              |             |             |
|----|--------------|-------------|-------------|
| C  | -4.25792800  | -0.25107500 | 0.11418300  |
| C  | -4.87537900  | -1.30696600 | -0.59610300 |
| C  | -6.27498300  | -1.38546700 | -0.58882900 |
| H  | -6.75663800  | -2.19499200 | -1.12944800 |
| C  | -7.06374900  | -0.45668900 | 0.10058800  |
| C  | -6.42187700  | 0.57253600  | 0.80320100  |
| H  | -7.03118100  | 1.29103100  | 1.34147100  |
| C  | -5.02679000  | 0.70010400  | 0.82971800  |
| C  | -4.07531500  | -2.36082000 | -1.36126400 |
| H  | -3.01897300  | -2.27038900 | -1.09405600 |
| C  | -4.17115000  | -2.11287300 | -2.88119900 |
| H  | -5.21017100  | -2.18227500 | -3.22691200 |
| H  | -3.57872700  | -2.85640000 | -3.42774700 |
| H  | -3.78863500  | -1.11834000 | -3.13114700 |
| C  | -4.51211600  | -3.79695900 | -1.00969700 |
| H  | -4.47477100  | -3.97198600 | 0.07187200  |
| H  | -3.84579300  | -4.51856800 | -1.49701000 |
| H  | -5.53230900  | -4.00931100 | -1.34988300 |
| C  | -8.58310900  | -0.55824300 | 0.09862400  |
| H  | -8.97165800  | 0.27997900  | 0.69252900  |
| C  | -9.15975800  | -0.42832900 | -1.32612500 |
| H  | -8.84872000  | 0.51159400  | -1.79545700 |
| H  | -10.25586700 | -0.45544800 | -1.30187200 |
| H  | -8.81867500  | -1.25116800 | -1.96568100 |
| C  | -9.06397000  | -1.86440900 | 0.76404500  |
| H  | -10.15962700 | -1.89869700 | 0.79852800  |
| H  | -8.68423200  | -1.95025300 | 1.78818800  |
| H  | -8.71844300  | -2.74147400 | 0.20383500  |
| C  | -4.36466300  | 1.88132000  | 1.54007200  |
| H  | -3.42824000  | 1.52713400  | 1.97940200  |
| C  | -5.20774900  | 2.47417400  | 2.68106100  |
| H  | -4.61580200  | 3.22072000  | 3.22282800  |
| H  | -5.51867700  | 1.70396400  | 3.39608300  |
| H  | -6.10633300  | 2.98054300  | 2.30787900  |
| C  | -4.01731800  | 2.98415600  | 0.51224700  |
| H  | -3.37760500  | 2.60457200  | -0.29234500 |
| H  | -3.48700800  | 3.80986800  | 1.00060200  |
| H  | -4.93065600  | 3.38396700  | 0.05400700  |
| Mo | -0.03174600  | 0.07867600  | -1.02780400 |
| Mo | 0.02704200   | -0.01706300 | 1.07575900  |
| N  | -0.15759600  | 2.19651300  | -0.98236500 |
| N  | 0.15285200   | -2.13485300 | 1.03035600  |
| O  | -0.07631400  | 2.05923500  | 1.28641400  |
| O  | 0.07142600   | -1.99758600 | -1.23841400 |
| O  | 2.07238000   | 0.20296600  | -1.13862400 |
| O  | 2.13508400   | 0.09957400  | 1.09239100  |

|   |             |             |             |
|---|-------------|-------------|-------------|
| O | -2.13989600 | -0.03701800 | -1.04439300 |
| O | -2.07711500 | -0.14055600 | 1.18662900  |

**[Mo-2-B]**

0 1

|   |             |             |             |
|---|-------------|-------------|-------------|
| C | -2.12812700 | -2.14788300 | -0.33376800 |
| C | -3.15362100 | -3.13835300 | -0.39629300 |
| C | -4.03607700 | -3.97598500 | -0.48413400 |
| C | -5.07038400 | -4.96495300 | -0.56693500 |
| C | -5.50756900 | -5.43785900 | -1.82174600 |
| H | -5.05339700 | -5.04356800 | -2.72531200 |
| C | -6.51563600 | -6.40394800 | -1.89611800 |
| H | -6.84806700 | -6.76399300 | -2.86497600 |
| C | -7.09806600 | -6.90782300 | -0.72306900 |
| H | -7.88126100 | -7.65766700 | -0.78351400 |
| C | -6.66740600 | -6.44051400 | 0.52810600  |
| H | -7.11792700 | -6.82839300 | 1.43665400  |
| C | -5.65952900 | -5.47485400 | 0.60918500  |
| H | -5.32228200 | -5.10717000 | 1.57339800  |
| C | -2.14221400 | -2.18516000 | 2.08491400  |
| C | -2.82176700 | -1.31208100 | 2.94918400  |
| H | -3.00755200 | -0.28941100 | 2.63429900  |
| C | -3.25535700 | -1.77495400 | 4.19877200  |
| H | -3.78462700 | -1.10072000 | 4.86543400  |
| C | -3.00731800 | -3.09878400 | 4.58805600  |
| H | -3.34032000 | -3.45322900 | 5.55900300  |
| C | -2.31715500 | -3.96211000 | 3.72253200  |
| H | -2.10954200 | -4.98432800 | 4.02483700  |
| C | -1.88114700 | -3.50863800 | 2.47254600  |
| H | -1.33031500 | -4.16402700 | 1.80555000  |
| C | 1.98094500  | -1.94822200 | -0.00617200 |
| C | 3.04236600  | -2.99267800 | -0.01674700 |
| C | 4.16805300  | -2.85882900 | 0.83587700  |
| C | 5.15656600  | -3.84681200 | 0.78387700  |
| H | 6.02427600  | -3.75504200 | 1.42853500  |
| C | 5.05927300  | -4.95049800 | -0.07925400 |
| C | 3.93527700  | -5.05403700 | -0.90376400 |
| H | 3.85057600  | -5.90886400 | -1.56918100 |
| C | 2.91257600  | -4.09130200 | -0.89188100 |
| C | 4.34733700  | -1.62201800 | 1.71563900  |
| H | 3.35803000  | -1.28032500 | 2.03222900  |
| C | 5.16475200  | -1.88124600 | 2.99226100  |
| H | 4.76098600  | -2.72447000 | 3.56413800  |
| H | 5.13666800  | -0.99181300 | 3.63204800  |
| H | 6.21874000  | -2.08887800 | 2.77078800  |

|    |             |             |             |
|----|-------------|-------------|-------------|
| C  | 4.99332900  | -0.48478900 | 0.88997700  |
| H  | 6.00256000  | -0.76844700 | 0.56573200  |
| H  | 5.06663100  | 0.42930200  | 1.49031400  |
| H  | 4.40498400  | -0.25173500 | -0.00481500 |
| C  | 6.14866300  | -6.01362800 | -0.11837200 |
| H  | 5.85229600  | -6.76407500 | -0.86371300 |
| C  | 6.28748500  | -6.73292800 | 1.23921300  |
| H  | 7.04255900  | -7.52611600 | 1.17951500  |
| H  | 5.33768000  | -7.18383100 | 1.54748400  |
| H  | 6.59702600  | -6.03384500 | 2.02520000  |
| C  | 7.50259500  | -5.42303700 | -0.56299100 |
| H  | 7.42058400  | -4.93613100 | -1.54111800 |
| H  | 8.26221000  | -6.21102300 | -0.63274900 |
| H  | 7.86076900  | -4.67542600 | 0.15473600  |
| C  | 1.70933000  | -4.26329500 | -1.81675900 |
| H  | 0.93633800  | -3.54184600 | -1.53631500 |
| C  | 2.10132000  | -3.95025600 | -3.27594000 |
| H  | 2.48243400  | -2.92735900 | -3.35971500 |
| H  | 1.22955600  | -4.04705100 | -3.93388500 |
| H  | 2.87748400  | -4.63908700 | -3.63228200 |
| C  | 1.08116900  | -5.66652700 | -1.70578000 |
| H  | 1.75942200  | -6.44756700 | -2.06868700 |
| H  | 0.16809300  | -5.71414900 | -2.31060800 |
| H  | 0.81729000  | -5.90444200 | -0.66879300 |
| Mo | -0.18336300 | -0.18919400 | 1.02046100  |
| N  | -1.66173600 | -1.67679400 | 0.82088600  |
| O  | 1.29085800  | -1.69992700 | 1.06583700  |
| O  | 1.72101000  | -1.26133000 | -1.08151100 |
| S  | -1.49710400 | -1.52292400 | -1.86510300 |
| C  | 2.12806300  | 2.14778600  | 0.33375700  |
| C  | 3.15356400  | 3.13825200  | 0.39628300  |
| C  | 4.03602200  | 3.97588200  | 0.48412700  |
| C  | 5.07032800  | 4.96485100  | 0.56694300  |
| C  | 5.50750000  | 5.43775400  | 1.82175900  |
| H  | 5.05332100  | 5.04345700  | 2.72532000  |
| C  | 6.51556100  | 6.40384600  | 1.89614400  |
| H  | 6.84798300  | 6.76388800  | 2.86500700  |
| C  | 7.09799800  | 6.90773100  | 0.72310200  |
| H  | 7.88118800  | 7.65757900  | 0.78355700  |
| C  | 6.66734800  | 6.44042700  | -0.52807900 |
| H  | 7.11787400  | 6.82831400  | -1.43662100 |
| C  | 5.65947700  | 5.47476200  | -0.60917000 |
| H  | 5.32223800  | 5.10708300  | -1.57338700 |
| C  | 2.14214300  | 2.18506400  | -2.08492300 |
| C  | 2.82165500  | 1.31196700  | -2.94920800 |
| H  | 3.00741200  | 0.28929000  | -2.63432900 |

|   |             |             |             |
|---|-------------|-------------|-------------|
| C | 3.25524500  | 1.77483200  | -4.19879900 |
| H | 3.78448300  | 1.10058300  | -4.86547100 |
| C | 3.00724800  | 3.09867300  | -4.58807200 |
| H | 3.34025000  | 3.45311400  | -5.55902000 |
| C | 2.31713000  | 3.96201900  | -3.72253100 |
| H | 2.10955200  | 4.98424600  | -4.02482600 |
| C | 1.88112300  | 3.50855500  | -2.47254100 |
| H | 1.33032700  | 4.16396100  | -1.80553600 |
| C | -1.98099500 | 1.94817500  | 0.00620100  |
| C | -3.04235300 | 2.99269900  | 0.01679000  |
| C | -4.16800500 | 2.85898700  | -0.83591300 |
| C | -5.15641400 | 3.84707200  | -0.78395500 |
| H | -6.02407900 | 3.75542300  | -1.42869000 |
| C | -5.05907900 | 4.95071800  | 0.07923000  |
| C | -3.93514000 | 5.05410800  | 0.90382800  |
| H | -3.85039300 | 5.90890500  | 1.56927900  |
| C | -2.91252800 | 4.09127100  | 0.89198000  |
| C | -4.34732200 | 1.62222600  | -1.71574300 |
| H | -3.35802400 | 1.28062300  | -2.03246600 |
| C | -5.16491600 | 1.88146800  | -2.99224400 |
| H | -4.76130600 | 2.72476500  | -3.56412400 |
| H | -5.13683100 | 0.99208000  | -3.63209100 |
| H | -6.21889600 | 2.08898400  | -2.77061900 |
| C | -4.99315400 | 0.48490400  | -0.89008300 |
| H | -6.00237100 | 0.76848600  | -0.56572600 |
| H | -5.06645800 | -0.42915500 | -1.49046900 |
| H | -4.40471700 | 0.25182400  | 0.00463800  |
| C | -6.14836000 | 6.01395900  | 0.11829300  |
| H | -5.85197700 | 6.76434800  | 0.86368500  |
| C | -6.28698900 | 6.73332100  | -1.23927900 |
| H | -7.04198200 | 7.52658800  | -1.17961800 |
| H | -5.33710800 | 7.18413400  | -1.54745400 |
| H | -6.59653900 | 6.03429900  | -2.02531700 |
| C | -7.50239300 | 5.42349600  | 0.56277400  |
| H | -7.42051900 | 4.93655300  | 1.54089500  |
| H | -8.26193100 | 6.21156100  | 0.63248900  |
| H | -7.86058300 | 4.67594500  | -0.15500500 |
| C | -1.70931000 | 4.26319700  | 1.81690200  |
| H | -0.93634400 | 3.54170400  | 1.53650700  |
| C | -2.10137600 | 3.95021300  | 3.27607300  |
| H | -2.48254200 | 2.92733500  | 3.35986000  |
| H | -1.22963600 | 4.04698400  | 3.93405100  |
| H | -2.87752400 | 4.63908300  | 3.63237500  |
| C | -1.08108100 | 5.66640000  | 1.70591600  |
| H | -1.75930900 | 6.44747400  | 2.06880200  |
| H | -0.16801100 | 5.71398500  | 2.31075700  |



|    |             |            |             |
|----|-------------|------------|-------------|
| H  | -0.81717800 | 5.90428700 | 0.66893100  |
| Mo | 0.18327800  | 0.18910500 | -1.02045500 |
| N  | 1.66166600  | 1.67670600 | -0.82089300 |
| O  | -1.29093400 | 1.69986200 | -1.06582100 |
| O  | -1.72107600 | 1.26126700 | 1.08153100  |
| S  | 1.49704200  | 1.52284300 | 1.86510300  |

## 11. References

- (1) Adamo, C.; Jacquemin, D. The calculations of excited-state properties with Time-Dependent Density Functional Theory. *Chemical Society Reviews* **2013**, 42 (3), 845-856.
- (2) Brémond, É. A. G.; Kieffer, J.; Adamo, C. A reliable method for fitting TD-DFT transitions to experimental UV–visible spectra. *Journal of Molecular Structure: THEOCHEM* **2010**, 954 (1), 52-56.
- (3) Guillaumont, D.; Nakamura, S. Calculation of the absorption wavelength of dyes using time-dependent density-functional theory (TD-DFT). *Dyes and Pigments* **2000**, 46 (2), 85-92.
- (4) Martynov, A. G.; Mack, J.; May, A. K.; Nyokong, T.; Gorbunova, Y. G.; Tsivadze, A. Y. Methodological Survey of Simplified TD-DFT Methods for Fast and Accurate Interpretation of UV–Vis–NIR Spectra of Phthalocyanines. *ACS Omega* **2019**, 4 (4), 7265-7284. DOI: 10.1021/acsomega.8b03500.
- (5) Latouche, C.; Skouteris, D.; Palazzetti, F.; Barone, V. TD-DFT Benchmark on Inorganic Pt(II) and Ir(III) Complexes. *Journal of Chemical Theory and Computation* **2015**, 11 (7), 3281-3289. DOI: 10.1021/acs.jctc.5b00257.
- (6) Farshad, M.; Perera, D. C.; Rasaiah, J. C. Theoretical study of the stability, structure, and optical spectra of small silver clusters and their formation using density functional theory. *Physical Chemistry Chemical Physics* **2021**, 23 (45), 25507-25517, 10.1039/D1CP04070G. DOI: 10.1039/D1CP04070G.
- (7) Powers, I. G.; Andjaba, J. M.; Luo, X.; Mei, J.; Uyeda, C. Catalytic Azoarene Synthesis from Aryl Azides Enabled by a Dinuclear Ni Complex. *Journal of the American Chemical Society* **2018**, 140 (11), 4110-4118.
- (8) Shields, D. J.; Elkoush, T.; Miura-Stempel, E.; Mak, C. L.; Niu, G.-H.; Gudmundsdottir, A. D.; Campbell, M. G. Visible Light Absorption and Long-Lived Excited States in Dinuclear Silver(I) Complexes with Redox-Active Ligands. *Inorganic Chemistry* **2020**, 59 (24), 18338-18344.
- (9) Kataoka, Y.; Imasaki, N.; Yano, N.; Mitsumi, M.; Handa, M. Redox-triggered reversible modulation of intense near-infrared and visible absorption using a paddlewheel-type diruthenium(III) complex. *Dalton Transactions* **2021**, 50 (27), 9547-9553, 10.1039/D1DT01681D.
- (10) Jiang, C.; Young, P. J.; Durr, C. B.; Spilker, T. F.; Chisholm, M. H. Synthesis, Structure, and Photophysical Properties of Mo<sub>2</sub>(NN)<sub>4</sub> and Mo<sub>2</sub>(NN)<sub>2</sub>(TiPB)<sub>2</sub>, Where NN = N,N'-Diphenylphenylpropiolamidinate and TiPB = 2,4,6-Triisopropylbenzoate. *Inorganic Chemistry* **2016**, 55 (12), 5836-5844.

- (11) Huang, J.; Gallucci, J. C.; Turro, C. Panchromatic dirhodium photocatalysts for dihydrogen generation with red light. *Chemical Science* **2020**, 11 (36), 9775-9783.
- (12) Millet, A.; Xue, C.; Song, E.; Turro, C.; Dunbar, K. R. Synthetic Strategies for Trapping the Elusive trans-Dirhodium(II,II) Formamidinate Isomer: Effects of Cis versus Trans Geometry on the Photophysical Properties. *Inorganic Chemistry* **2020**, 59 (4), 2255-2265.
- (13) Whittemore, T. J.; Millet, A.; Sayre, H. J.; Xue, C.; Dolinar, B. S.; White, E. G.; Dunbar, K. R.; Turro, C. Tunable Rh<sub>2</sub> (II, II) light absorbers as excited-state electron donors and acceptors accessible with red/near-infrared irradiation. *Journal of the American Chemical Society* **2018**, 140 (15), 5161-5170.
- (14) Li, Z.; Leed, N. A.; Dickson-Karn, N. M.; Dunbar, K. R.; Turro, C. Directional charge transfer and highly reducing and oxidizing excited states of new dirhodium(ii,ii) complexes: potential applications in solar energy conversion. *Chemical Science* **2014**, 5 (2), 727-737, 10.1039/C3SC52366G.
- (15) Jiang, C.; Young, P. J.; Brown-Xu, S.; Gallucci, J. C.; Chisholm, M. H. Femtosecond Study of Dimolybdenum Paddlewheel Compounds with Amide/Thioamide Ligands: Symmetry, Electronic Structure, and Charge Distribution in the 1MLCT S<sub>1</sub> State. *Inorganic Chemistry* **2017**, 56 (3), 1433-1445. DOI: 10.1021/acs.inorgchem.6b02517.
- (16) GaussView, Version 6, Dennington, Roy; Keith, Todd A.; Millam, John M. Semichem Inc., Shawnee Mission, KS, 2016.
